# Supplementary material for: Synthesis of nitrogen-rich imidazole, 1,2,4-triazole and tetrazole-based compounds
Source: Royal Society of Chemistry journal article supplement (doi:10.1039/c3ra47227b), 2013-12-18
Supplement: c3ra47227b.pdf [file c3ra47227b.pdf]

## Supporting Information

- 1 *1H*-Tetrazol-5-amine (**1**)  
a. <sup>1</sup>HNMR, b. <sup>13</sup>CNMR
- 2 2-Azido-1*H*-imidazole-4,5-dicarbonitrile (**4**)  
a. <sup>1</sup>HNMR, b. <sup>13</sup>CNMR, c. DSC-TGA, d. C, H, N analysis
- 3 4,5-Di(1*H*-tetrazol-5-yl)-1*H*-imidazol-2-amine (**5**)  
a. <sup>1</sup>HNMR, b. <sup>13</sup>CNMR, c. DSC-TGA, d. HRMS, e. C, H, N analysis
- 4 2-(1*H*-Tetrazol-1-yl)-1*H*-imidazole-4,5-dicarbonitrile (**6**)  
a. <sup>1</sup>HNMR, b. <sup>13</sup>CNMR, c. DSC-TGA, d. HRMS, e. C, H, N analysis
- 5 5, 5'-(2-(1*H*-Tetrazol-1-yl)-1*H*-imidazole-4,5-diyl)bis(1*H*-tetrazole (**7**)  
a. <sup>1</sup>HNMR, b. <sup>13</sup>CNMR, c. DSC-TGA, d. HRMS and e. C, H, N analysis
- 6 2-Amino-5-cyano-1*H*-imidazole-4-carboxamide (**8**)  
a. <sup>1</sup>HNMR, b. <sup>13</sup>CNMR, c. DSC-TGA, d. HRMS, e. C, H, N analysis
- 7 1-(1*H*-1,2,4-Triazol-3-yl)-1*H*-tetrazole (**9**)  
a. <sup>1</sup>HNMR, b. <sup>13</sup>CNMR, c. DEPT, d. DSC-TGA, e. HRMS and f. C, H, N analysis
- 8 Diaminomethaniminium 3-(1*H*-tetrazol-1-yl)-1,2,4-triazol-1-ide (**9a**)  
a. <sup>1</sup>HNMR, b. <sup>13</sup>CNMR, c. DEPT, d. DSC-TGA, e. HRMS and f. C, H, N analysis
- 9 (Hydrazinylcarbonyl)hydrazinium 3-(1*H*-tetrazol-1-yl)-1,2,4-triazol-1-ide (**9b**)  
a. <sup>1</sup>HNMR, b. <sup>13</sup>CNMR, c. DEPT, d. DSC-TGA, e. C, H, N analysis

- 10 4-Amino-4*H*-1,2,4-triazol-1-ium 3-(1*H*-tetrazol-1-yl)-1,2,4-triazol-1-ide (**9c**)  
a. <sup>1</sup>HNMR, b. <sup>13</sup>CNMR, c. DEPT, d. DSC-TGA, e. HRMS, f. C, H, N analysis.
- 11 3-Amino-1*H*-1,2,4-triazol-4-ium 3-(1*H*-tetrazol-1-yl)-1,2,4-triazol-1-ide (**9d**)  
a. <sup>1</sup>HNMR, b. <sup>13</sup>CNMR, c. DEPT, d. DSC-TGA, e. C, H, N analysis
- 12 3,5-Diamino-1*H*-1,2,4-triazol-4-ium 3-(1*H*-tetrazol-1-yl)-1,2,4-triazol-1-ide (**9e**)  
a. <sup>1</sup>HNMR, b. <sup>13</sup>CNMR, c. DEPT, d. DSC-TGA, e. C, H, N analysis
- 13 5-(1*H*-Tetrazol-1-yl)-1*H*-1,2,4-triazol-3-amine (**10**)  
a. <sup>1</sup>HNMR, b. D<sub>2</sub>O exchange <sup>1</sup>H c. <sup>13</sup>CNMR, d. DEPT, e. DSC-TGA, f. HRMS  
and g. C, H, N analysis
- 14 Diaminomethaniminium 3-amino-5-(1*H*-tetrazol-1-yl)-1,2,4-triazol-1-ide (**10a**)  
a. <sup>1</sup>HNMR, b. <sup>13</sup>CNMR, c. DSC-TGA, d. HRMS and e. C, H, N analysis
- 15 (Hydrazinylcarbonyl)hydrazonium 3-amino-5-(1*H*-tetrazol-1-yl)-1,2,4-triazol-1-ide (**10b**)  
a. <sup>1</sup>HNMR, b. <sup>13</sup>CNMR, c. DSC-TGA, d. HRMS, e. C, H, N analysis
- 16 3-Amino-1*H*-1,2,4-triazol-4-ium 3-amino-5-(1*H*-tetrazol-1-yl)-1,2,4-triazol-1-ide (**10d**)  
a. <sup>1</sup>HNMR, b. <sup>13</sup>CNMR, c. DEPT, d. DSC-TGA, e. C, H, N analysis
- 17 3,5-Diamino-1*H*-1,2,4-triazol-4-ium 3-amino-5-(1*H*-tetrazol-1-yl)-1,2,4-triazol-1-ide (**10e**)  
a. <sup>1</sup>HNMR, b. <sup>13</sup>CNMR, c. DEPT, d. DSC-TGA, e. HRMS, f. C, H, N analysis
- 18 1-(3-Azido-1*H*-1,2,4-triazol-5-yl)-1*H*-tetrazole (**11**)  
a. <sup>1</sup>HNMR, b. <sup>13</sup>CNMR, c. DSC-TGA, d. HRMS, e. C, H, N analysis
- 19 3,5-Diamino-1*H*-1,2,4-triazol-4-ium 3-azido-5-(1*H*-tetrazol-1-yl)-1,2,4-triazol-1-ide (**11e**)

a.  $^1\text{H}$ NMR, b.  $^{13}\text{C}$ NMR, c. DEPT, d. DSC-TGA, e. C, H, N analysis

20 3-Azido-1*H*-1,2,4-triazol-5-amine (**12**)

a.  $^1\text{H}$ NMR, b.  $^{13}\text{C}$ NMR, c. DSC-TGA, d. HRMS, e. C, H, N analysis

21 Diaminomethaniminium 5-amino-3-azido-1,2,4-triazol-1-ide (**12a**)

a.  $^1\text{H}$ NMR, b.  $^{13}\text{C}$ NMR, c. DSC-TGA, d. HRMS and e. C, H, N analysis

22 3,5-Diamino-1*H*-1,2,4-triazol-4-ium 5-amino-3-azido-1,2,4-triazol-1-ide (**12e**)

a.  $^1\text{H}$ NMR, b.  $^{13}\text{C}$ NMR, c. DSC-TGA, d. HRMS, e. C, H, N analysis

## 1. 1*H*-Tetrazol-5-amine (1)

### a. <sup>1</sup>H NMR

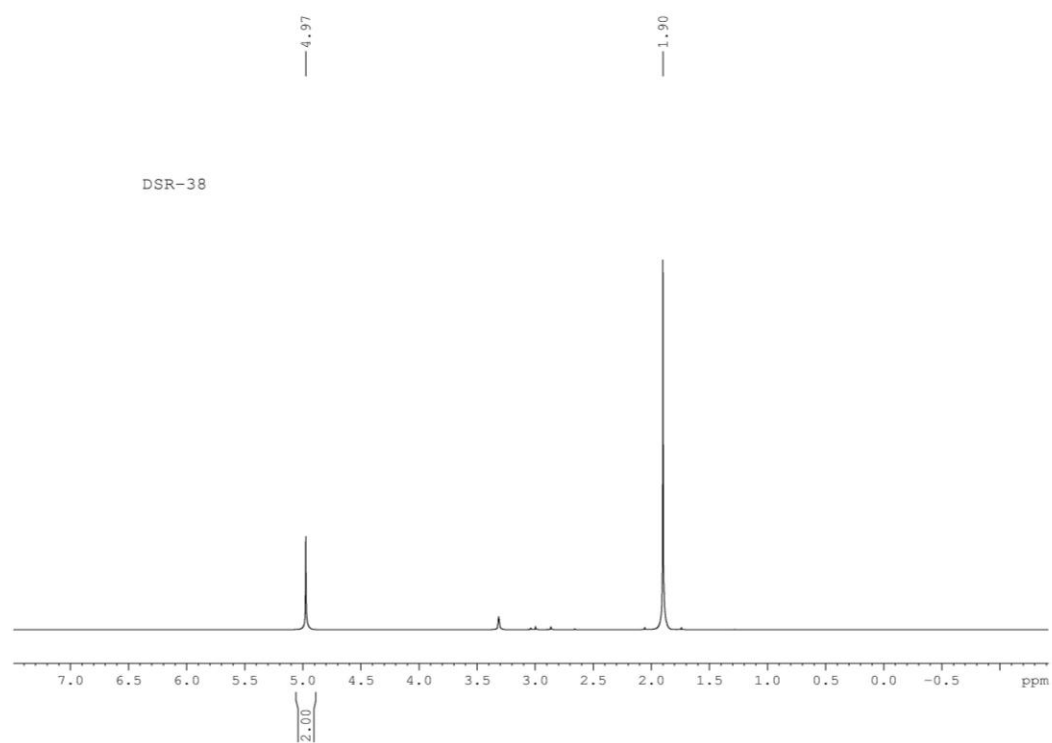

### b. <sup>13</sup>C NMR

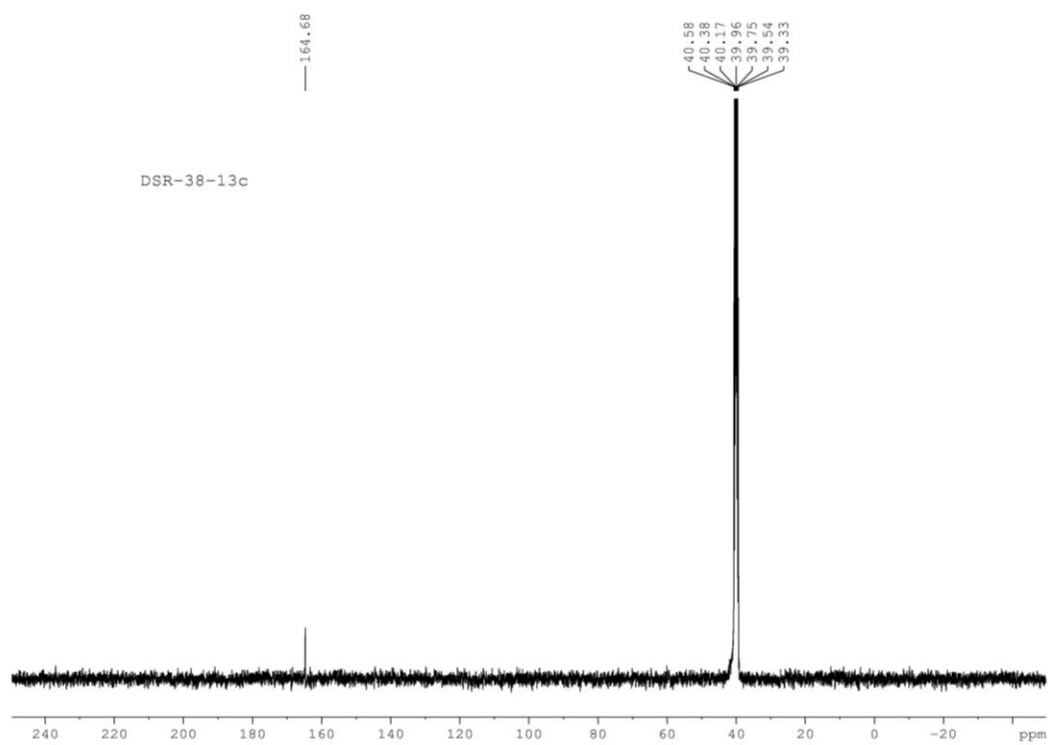

## 2. 2-Azido-1*H*-imidazole-4,5-dicarbonitrile (4)

### a. <sup>13</sup>C NMR

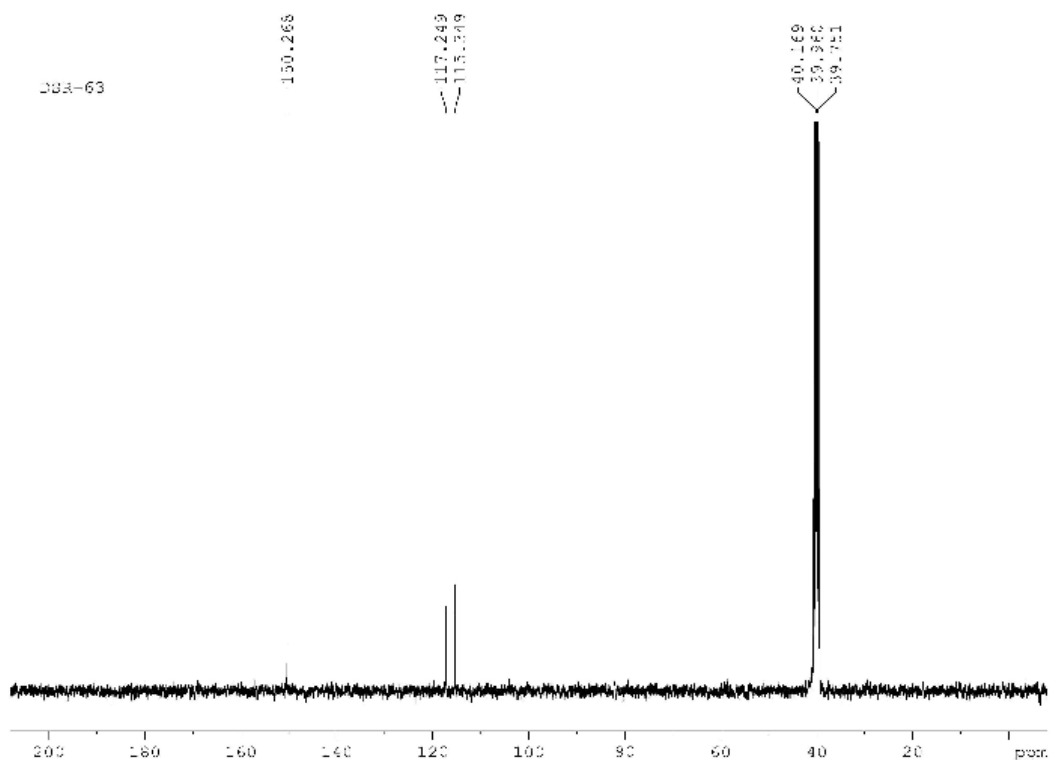

### b. TG-DTA measurement

Sample: dsr-63  
Size: 4.3040 mg  
Method: Ramp

DSC-TGA

File: C:\TAData\SDT\srinivasanna\dsr-63.001  
Operator: gsreddy  
Run Date: 15-Dec-12 10:02  
Instrument: SDT Q600 V20.9 Build 20

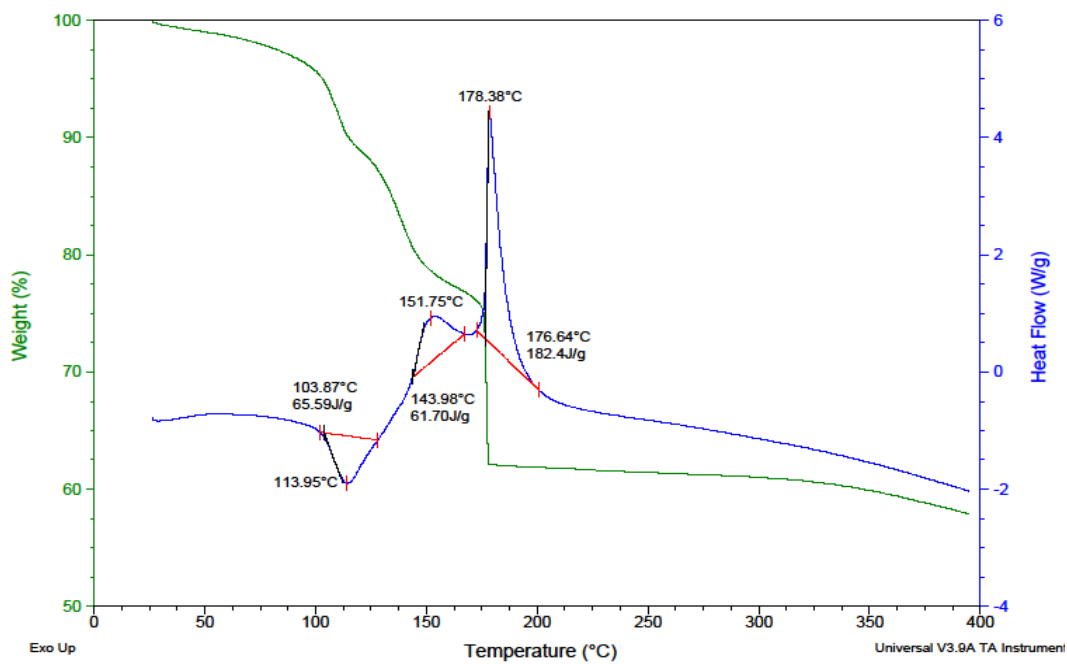

c. C H N analysis

FLASH EA 1112 SERIES CHN REPORT  
SCHOOL OF CHEMISTRY  
UNIVERSITY OF HYDERABAD

Method filename: E:\Program Files\Thermo Finnigan\Eager 300 for EA1112\DATA\Sys\_data\_ex  
Sample ID: DSR-63 (# 75)  
Analysis type: UnkNown  
Chromatogram filename: UNK-15022013-5.dat  
Sample weight: 1.136

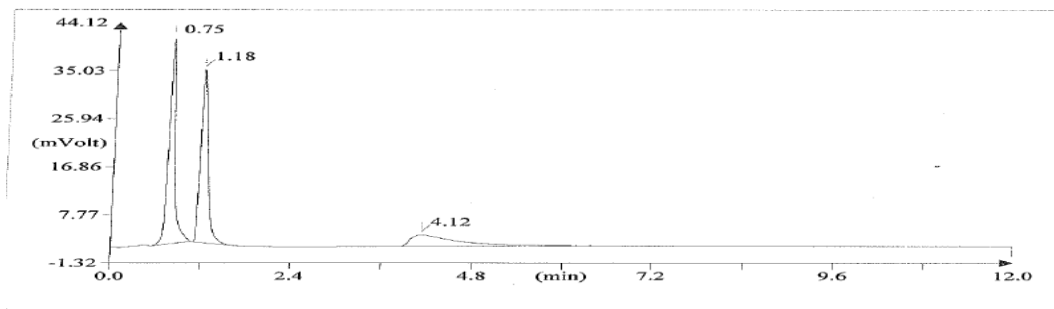

| Element Name | Element % | Ret. Time |
|--------------|-----------|-----------|
| Nitrogen     | 61.52     | 0.75      |
| Carbon       | 37.62     | 1.18      |
| Hydrogen     | 0.71      | 4.12      |

*CSA*

### 3. 4,5-Di(1*H*-tetrazol-5-yl)-1*H*-imidazol-2-amine(5)

#### a. <sup>1</sup>H NMR

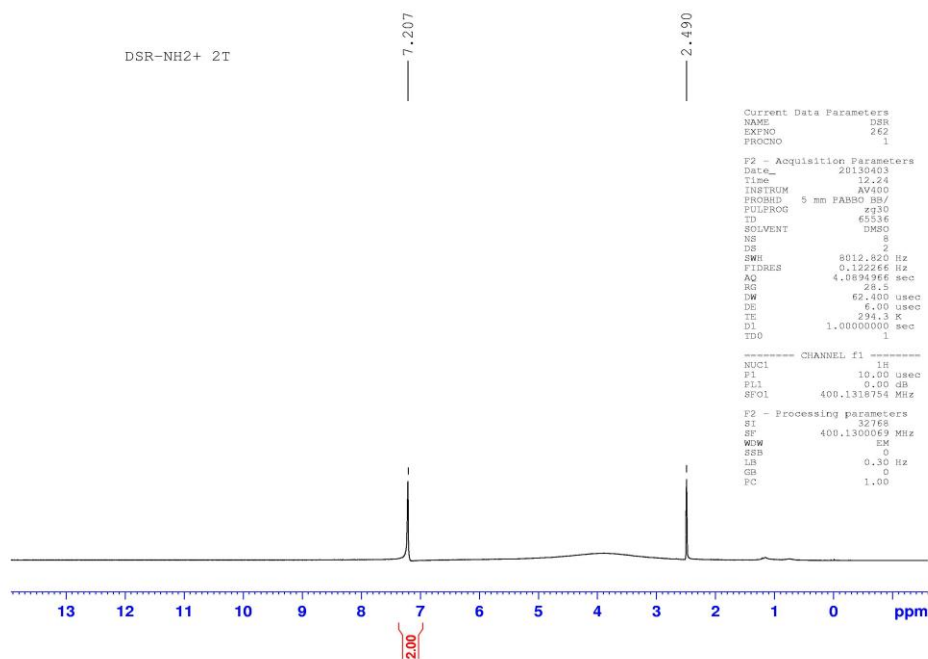

#### b. <sup>13</sup>C NMR

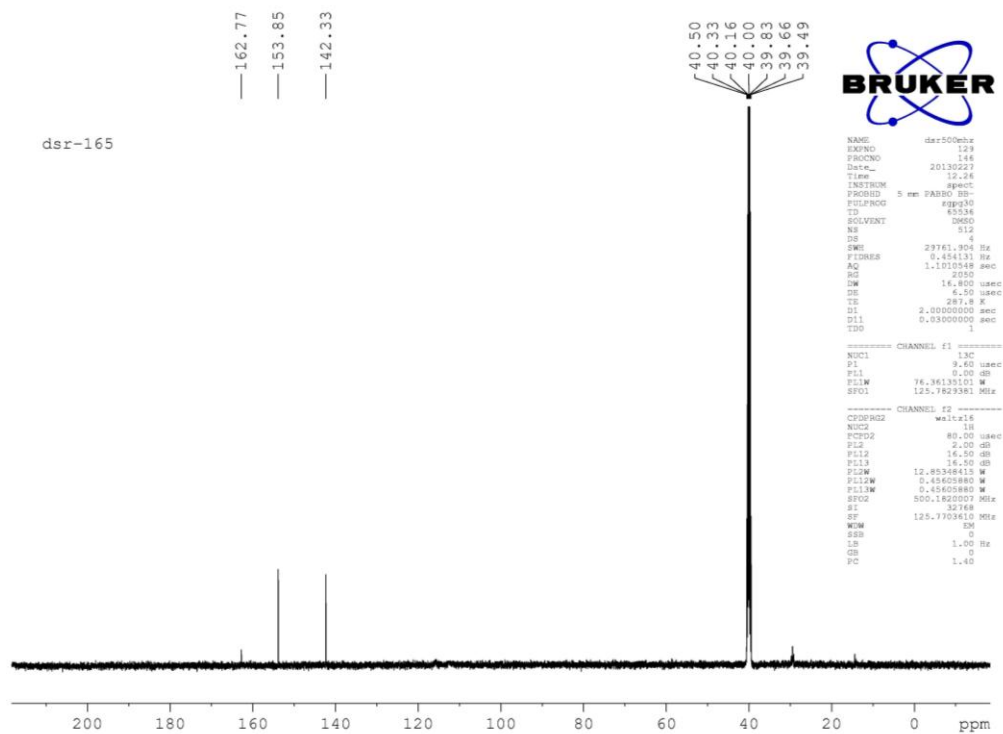

### c. TG-DTA measurement

Sample: dsf-21+NH<sub>2</sub>  
Size: 1.8120 mg  
Method: Ramp

DSC-TGA

File: C:\...SDU\srinivasanna\dsf-21-NH<sub>2</sub>.001  
Operator: gsreddy  
Run Date: 04-Mar-13 12:11  
Instrument: SDT Q600 V20.9 Build 20

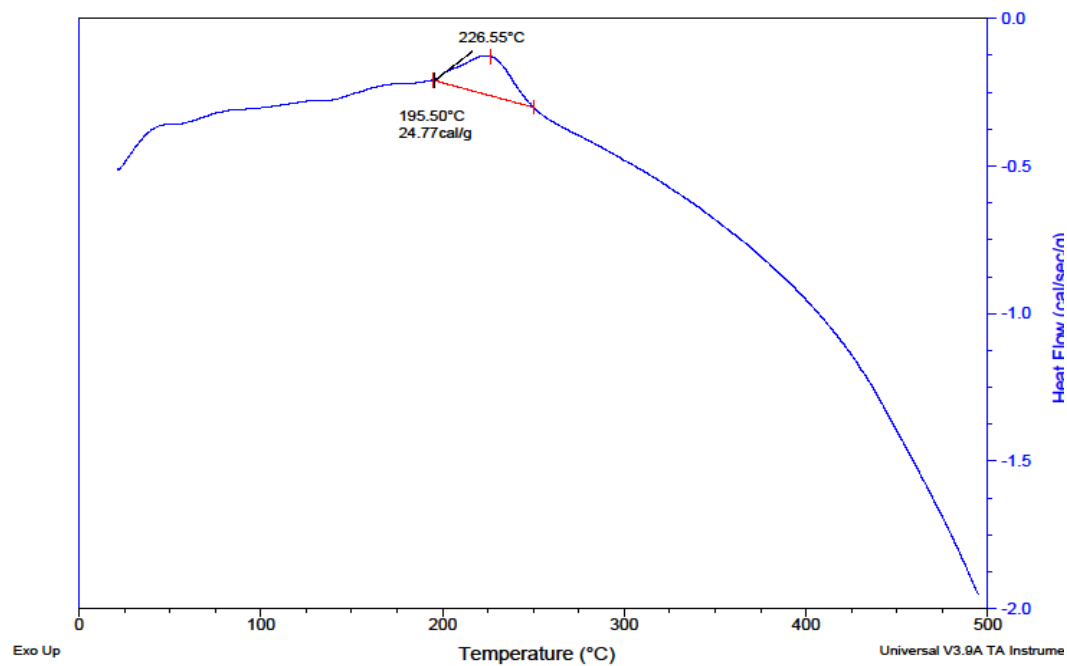



d.HRMS

BRUKER MAXIS HRMS REPORT

School of Chemistry  
University of Hyderabad

|                      |                                             |                  |                      |
|----------------------|---------------------------------------------|------------------|----------------------|
| <b>Analysis Info</b> |                                             |                  |                      |
| Analysis Name        | D:\Data\2013\Dr.K.MURLIDHARAN\JULY\DSR-2T.d | Acquisition Date | 7/17/2013 3:42:37 PM |
| Method               | tune_low_Pos.m                              | Operator         | Ramu Sridhar         |
| Sample Name          | DSR-2T-MEOH                                 | Instrument       | maXis 10138          |
| Comment              |                                             |                  |                      |

|                              |            |                       |           |                  |           |
|------------------------------|------------|-----------------------|-----------|------------------|-----------|
| <b>Acquisition Parameter</b> |            |                       |           |                  |           |
| Source Type                  | ESI        | Ion Polarity          | Positive  | Set Nebulizer    | 4.4 psi   |
| Focus                        | Not active | Set Capillary         | 4200 V    | Set Dry Heater   | 180 °C    |
| Scan Begin                   | 50 m/z     | Set End Plate Offset  | -500 V    | Set Dry Gas      | 4.0 l/min |
| Scan End                     | 1500 m/z   | Set Collision Cell RF | 350.0 Vpp | Set Divert Valve | Waste     |

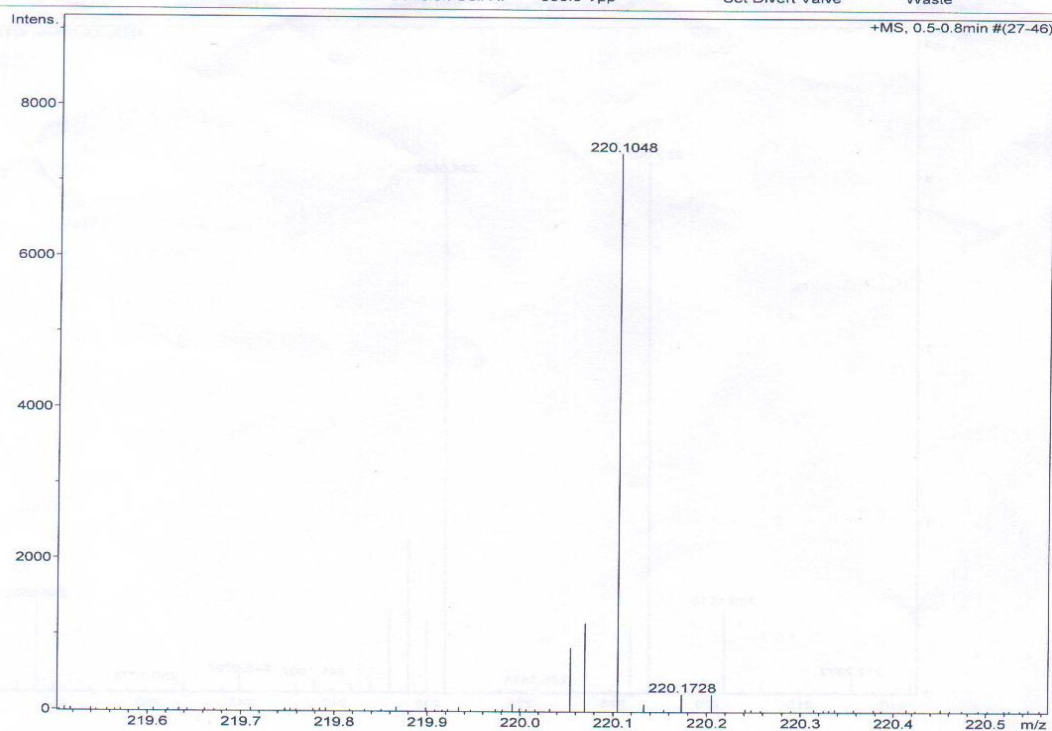

e. C H N analysis

FLASH EA 1112 SERIES CHN REPORT  
SCHOOL OF CHEMISTRY  
UNIVERSITY OF HYDERABAD

Method filename: E:\Program Files\Thermo Finnigan\Eager 300 for EA1112\DATA\Sys\_data\_ex  
Sample ID: DSR-34 (# 77)  
Analysis type: UnkNown  
Chromatogram filename: UNK-15022013-7.dat  
Sample weight: 1.615

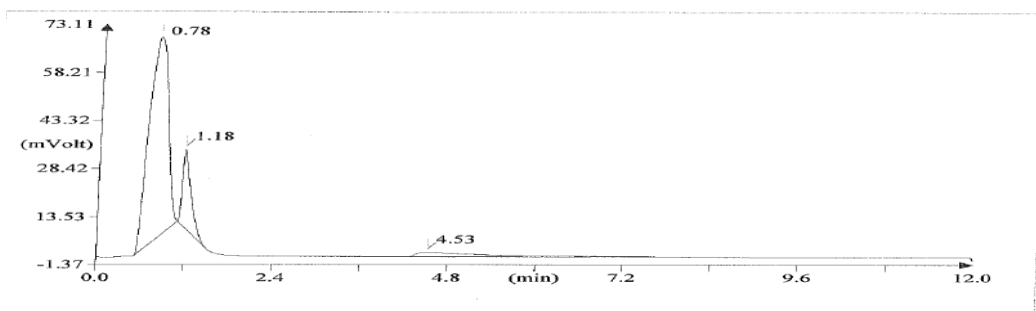

| Element Name | Element % | Ret. Time |
|--------------|-----------|-----------|
| Nitrogen     | 70.21     | 0.78      |
| Carbon       | 27.51     | 1.18      |
| Hydrogen     | 2.36      | 4.53      |

*032*

## 4. 2-(1*H*-Tetrazol-1-yl)-1*H*-imidazole-4,5-dicarbonitrile(6)

### a. <sup>1</sup>H NMR

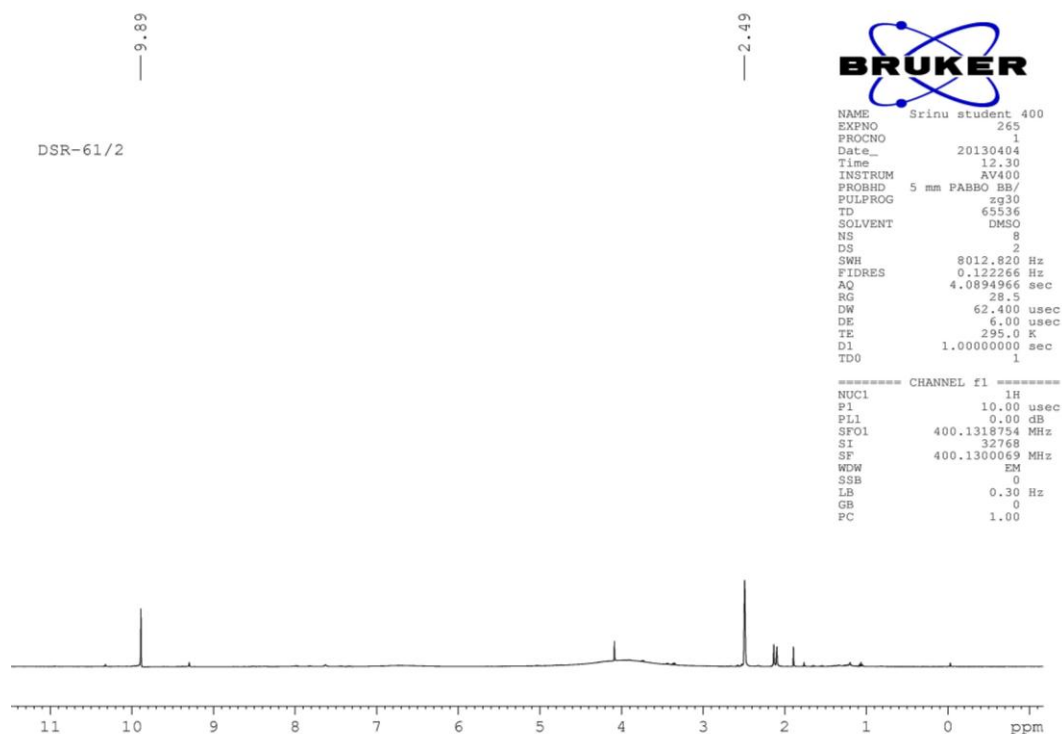

### b. <sup>13</sup>C NMR

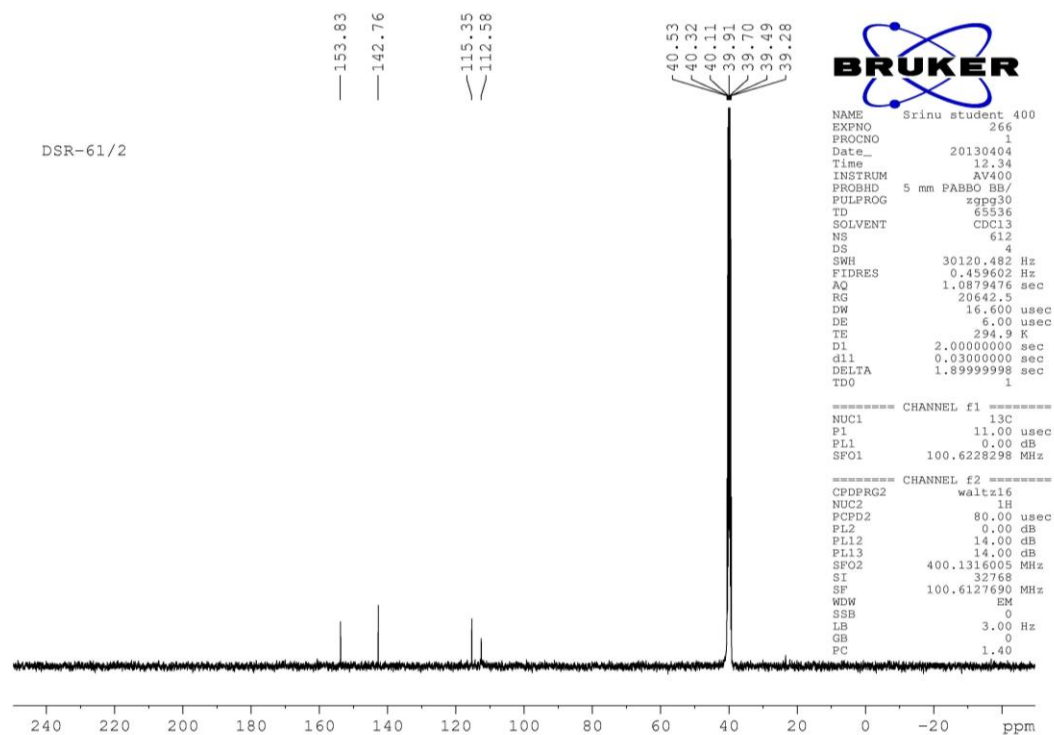

### c. TG-DTA measurement

Sample: dsr-91  
Size: 1.6120 mg  
Method: Ramp

DSC-TGA

File: C:\TA\Data\SDT\srinivasanna\dsr-91.001  
Operator: gsreddy  
Run Date: 14-Dec-12 12:02  
Instrument: SDT Q600 V20.9 Build 20

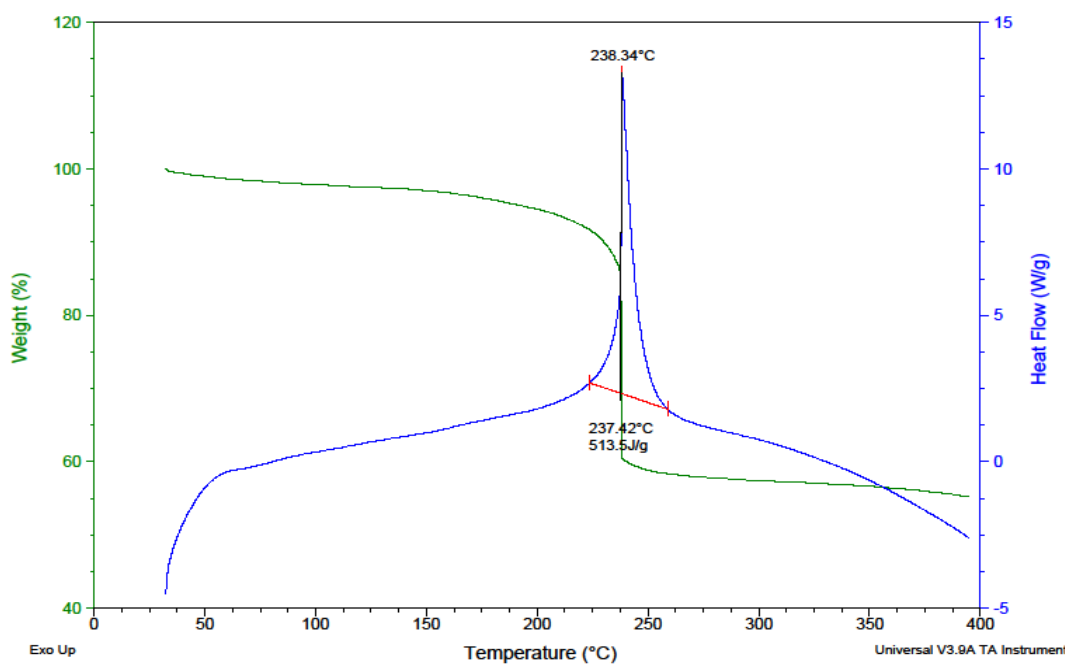

d.HRMS

BRUKER MAXIS HRMS REPORT

School of Chemistry  
University of Hyderabad

Analysis Info

Analysis Name D:\Data\2013\Dr.K.MURLIDHARAN\JULY\DSR-61.d  
Method tune\_low\_Pos.m  
Sample Name DSR-61-MEOH  
Comment

Acquisition Date 7/31/2013 2:33:05 PM

Operator Ramu Sridhar  
Instrument maXis 10138

Acquisition Parameter

|             |            |                       |           |                  |           |
|-------------|------------|-----------------------|-----------|------------------|-----------|
| Source Type | ESI        | Ion Polarity          | Positive  | Set Nebulizer    | 4.4 psi   |
| Focus       | Not active | Set Capillary         | 4200 V    | Set Dry Heater   | 180 °C    |
| Scan Begin  | 50 m/z     | Set End Plate Offset  | -500 V    | Set Dry Gas      | 4.0 l/min |
| Scan End    | 1500 m/z   | Set Collision Cell RF | 350.0 Vpp | Set Divert Valve | Waste     |

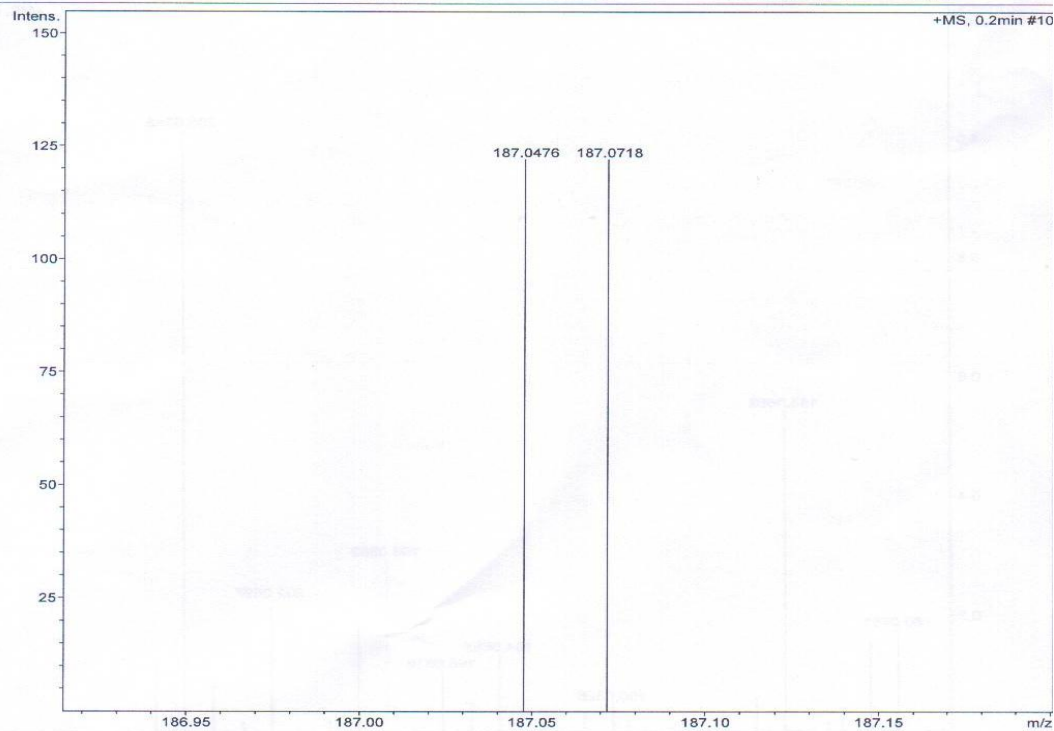

e. C H N analysis

FLASH EA 1112 SERIES CHN REPORT  
SCHOOL OF CHEMISTRY  
UNIVERSITY OF HYDERABAD

Method filename: E:\Program Files\Thermo Finnigan\Eager 300 for EA1112\DATA\Sys\_data\_ex  
Sample ID: DSR-68 (# 84)  
Analysis type: UnkNown  
Chromatogram filename: UNK-15022013-14.dat  
Sample weight: .612

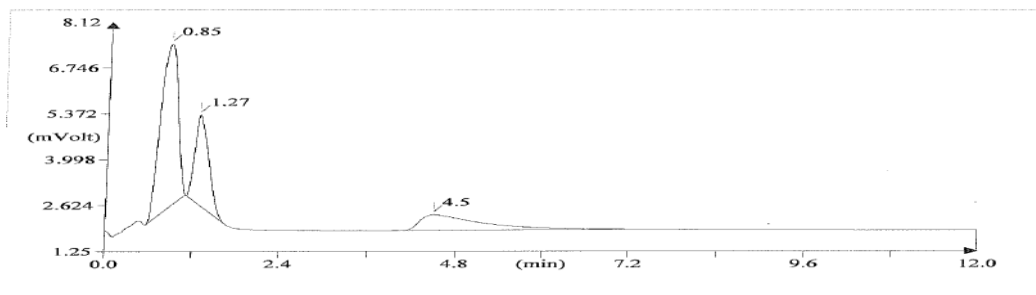

| Element Name | Element % | Ret. Time |
|--------------|-----------|-----------|
| Nitrogen     | 60.36     | 0.85      |
| Carbon       | 38.65     | 1.27      |
| Hydrogen     | 1.16      | 4.50      |

*BA*

## 5, 5'-(2-(1H-Tetrazol-1-yl)-1H-imidazole-4,5-diyl)bis(1H-tetrazole) (7)

### a. <sup>1</sup>H NMR

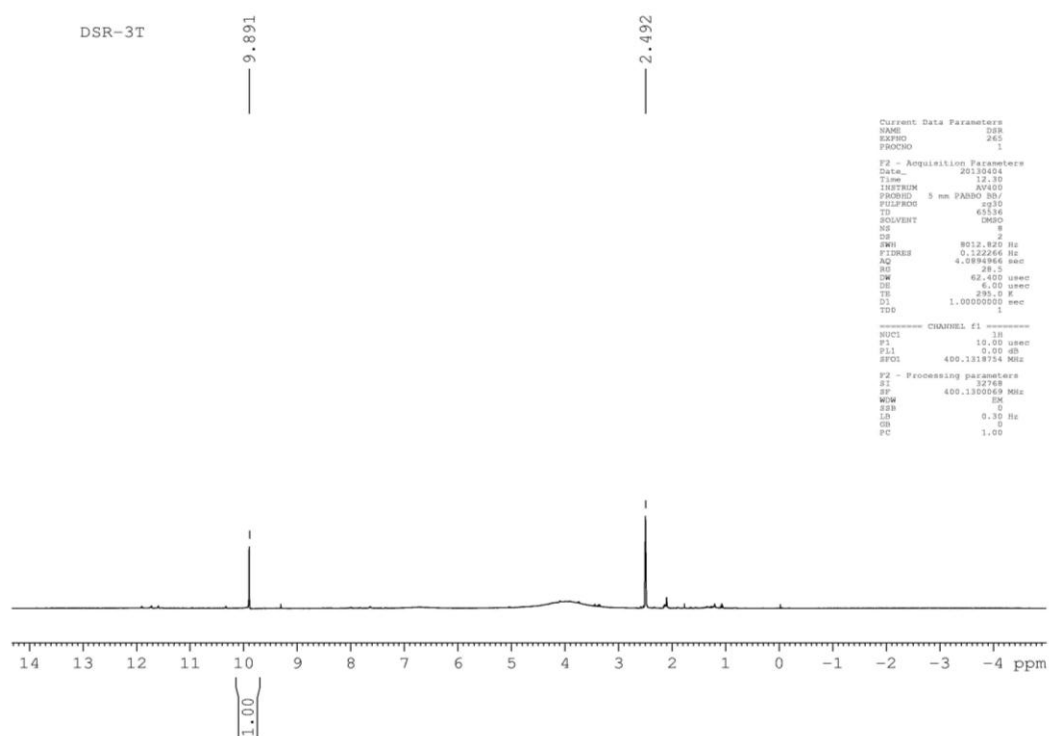

### b. <sup>13</sup>C NMR

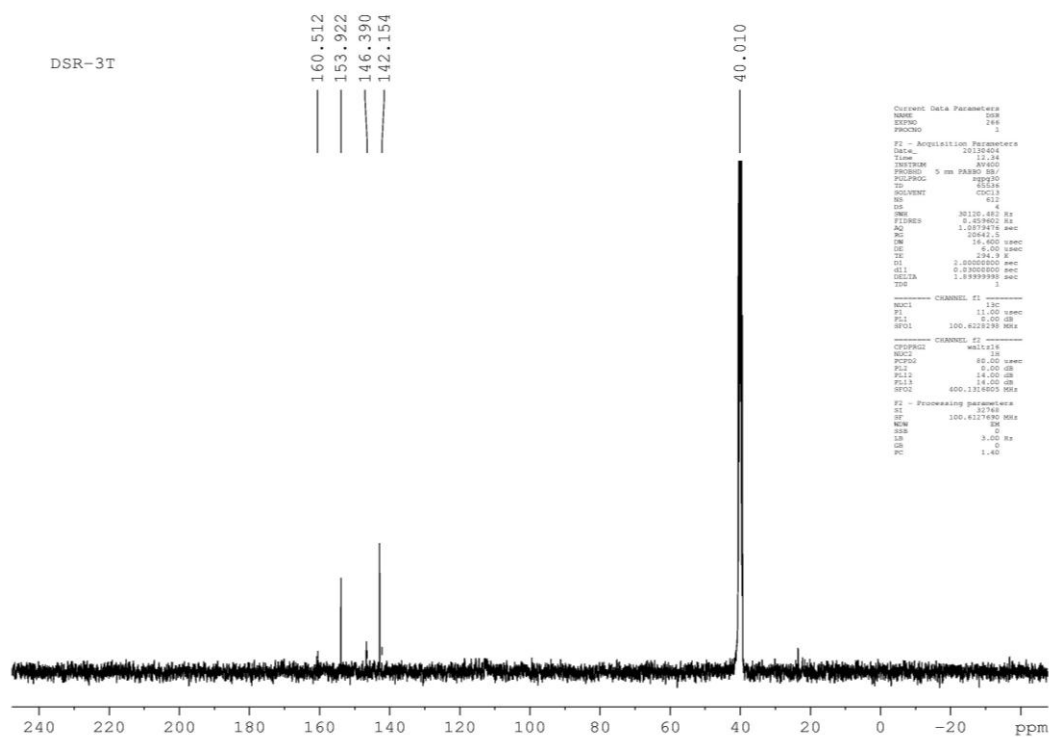

### c. TG-DTA measurement

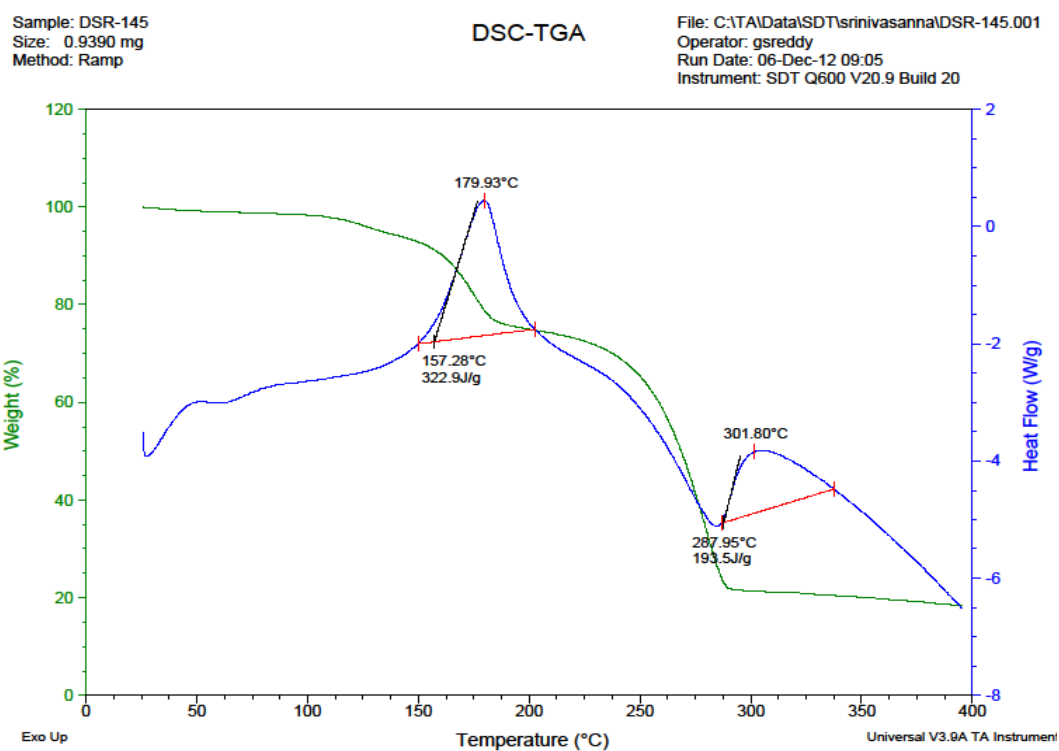



d. HRMS

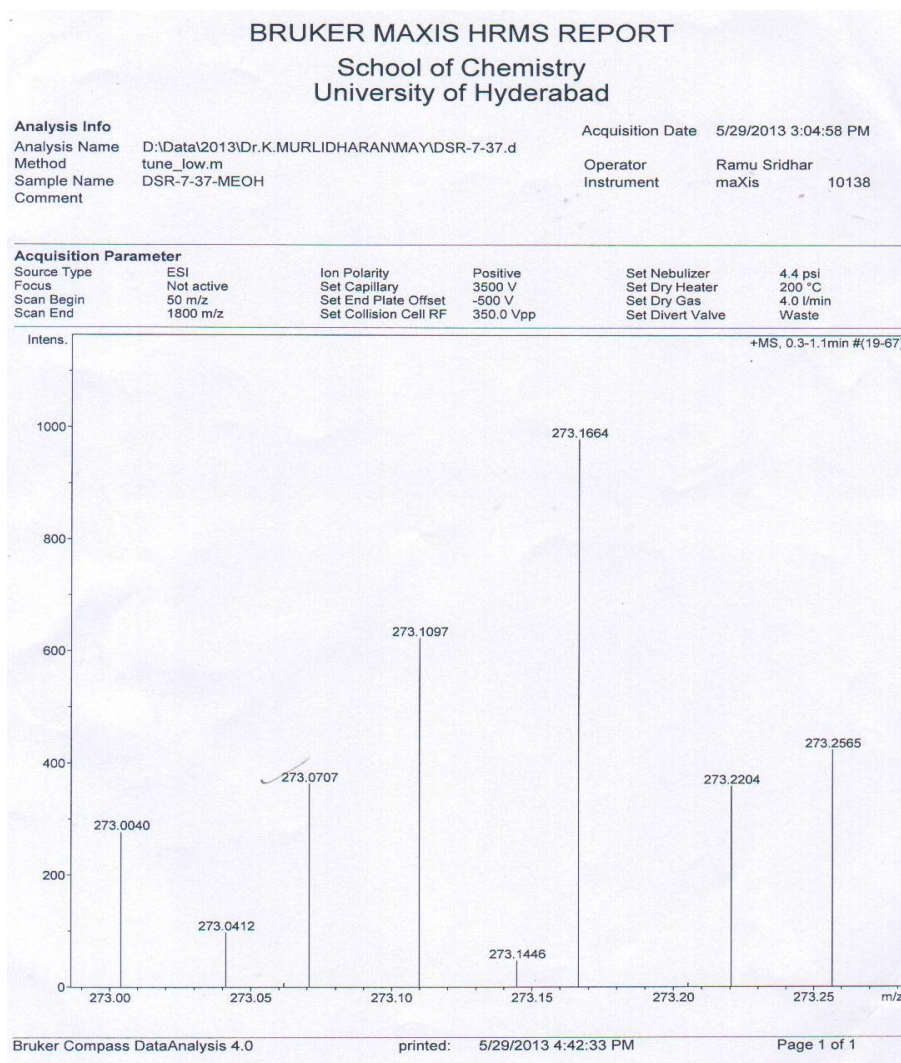

e. CHN analysis

UNIVERSITY OF HYDERABAD

Method filename: E:\Program Files\Thermo Finnigan\Eager 300 for EA1112\DATA\Sys\_data\_ex  
Sample ID: DSR-79 (# 71)  
Analysis type: Unknown  
Chromatogram filename: UNK-15022013-1.dat  
Sample weight: .786

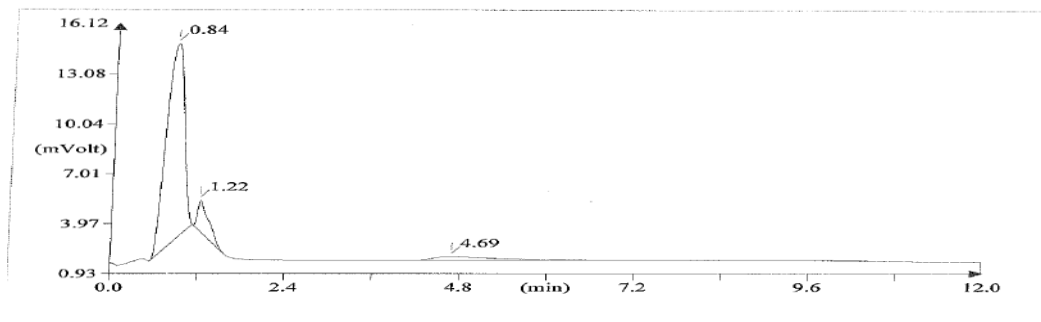

| Element Name | Element % | Ret. Time |
|--------------|-----------|-----------|
| Nitrogen     | 72.15     | 0.84      |
| Carbon       | 26.35     | 1.22      |
| Hydrogen     | 1.41      | 4.69      |

634

## 6. 2-Amino-5-cyano-1*H*-imidazole-4-carboxamide (8)

### a. $^1\text{H}$ NMR

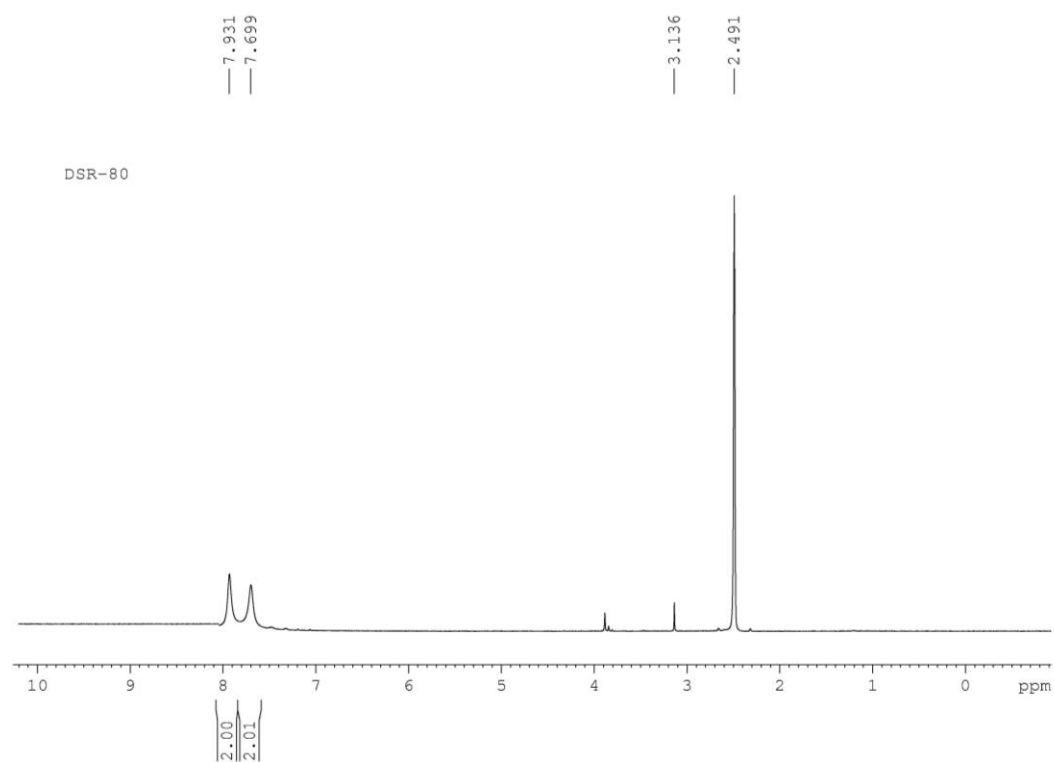

### b. $^{13}\text{C}$ NMR

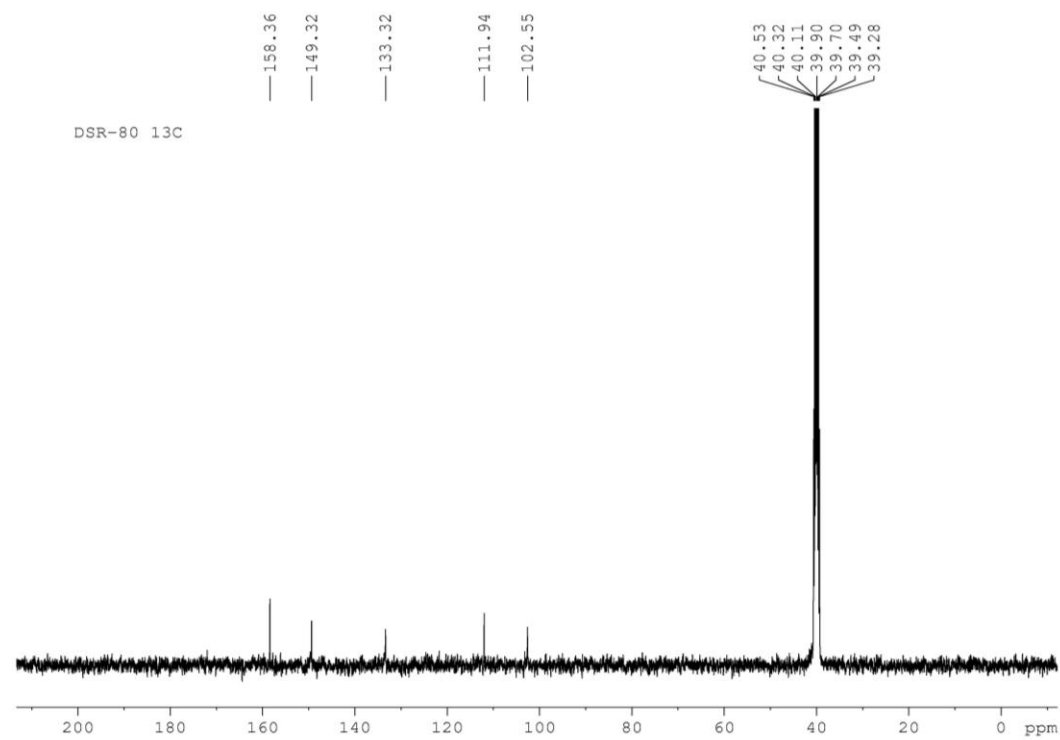

c. TG-DTA measurement

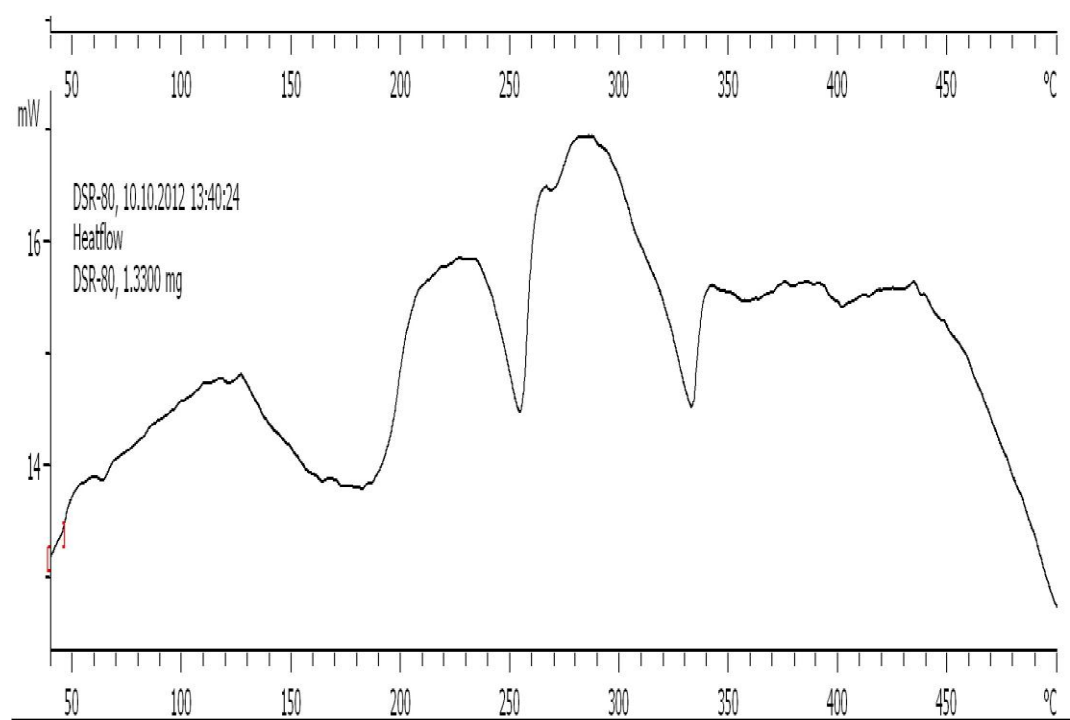

d. HRMS

BRUKER MAXIS HRMS REPORT

School of Chemistry  
University of Hyderabad

|                      |                                            |                  |                     |
|----------------------|--------------------------------------------|------------------|---------------------|
| <b>Analysis Info</b> |                                            | Acquisition Date | 7/9/2013 4:31:32 PM |
| Analysis Name        | D:\Data\2013\Dr.K.MURLIDHARANJULY\DSR-80.d | Operator         | Ramu Sridhar        |
| Method               | tune_low_Pos-R2.m                          | Instrument       | maXis 10138         |
| Sample Name          | DSR-80-MEOH                                |                  |                     |
| Comment              |                                            |                  |                     |

|                              |            |                       |           |                  |           |
|------------------------------|------------|-----------------------|-----------|------------------|-----------|
| <b>Acquisition Parameter</b> |            |                       |           |                  |           |
| Source Type                  | ESI        | Ion Polarity          | Positive  | Set Nebulizer    | 4.4 psi   |
| Focus                        | Not active | Set Capillary         | 3800 V    | Set Dry Heater   | 180 °C    |
| Scan Begin                   | 50 m/z     | Set End Plate Offset  | -500 V    | Set Dry Gas      | 4.0 l/min |
| Scan End                     | 2580 m/z   | Set Collision Cell RF | 350.0 Vpp | Set Divert Valve | Waste     |

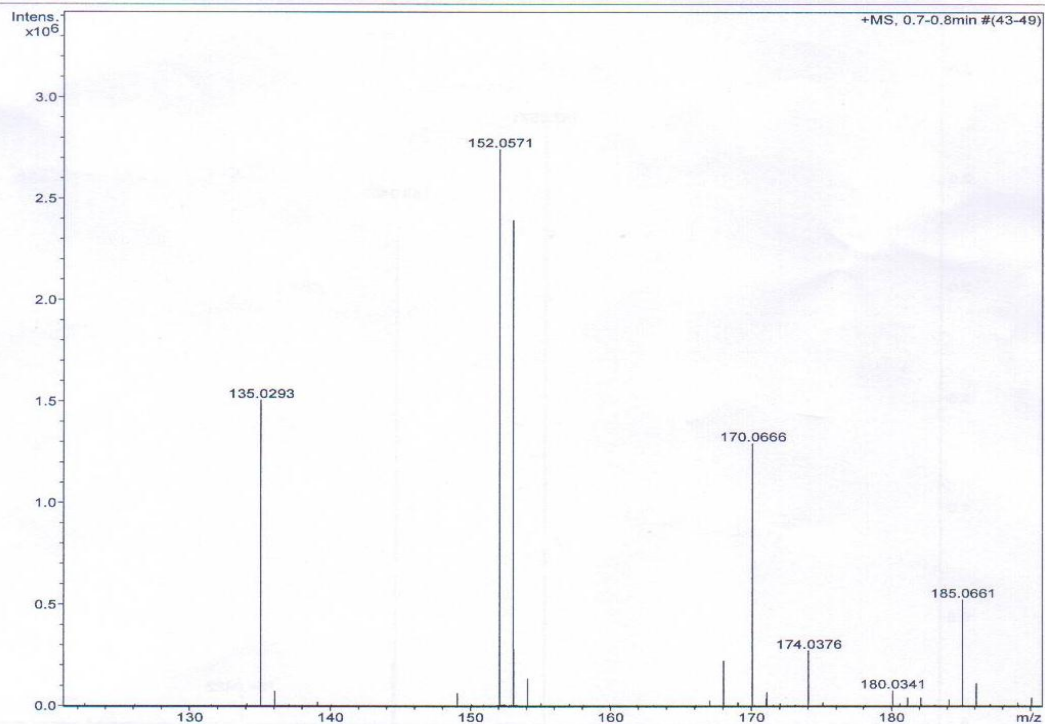

e. C H N analysis

FLASH EA 1112 SERIES CHN REPORT  
SCHOOL OF CHEMISTRY  
UNIVERSITY OF HYDERABAD

Method filename: C:\Program Files\Thermo Finnigan\Eager 300 for EA1112\DATA\Sys\_data\_ex  
Sample ID: DSR-80 (# 31)  
Analysis type: UnkNown  
Chromatogram filename: UNK-11102012-1.dat  
Sample weight: 1.113

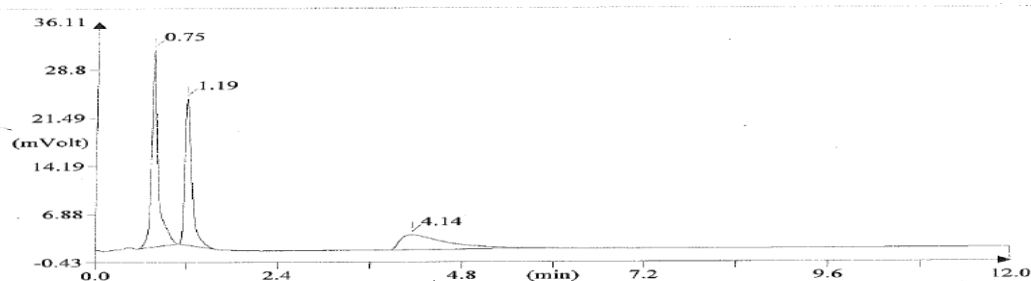

| Element Name | Element % | Ret. Time |
|--------------|-----------|-----------|
| Nitrogen     | 46.23     | 0.75      |
| Carbon       | 39.62     | 1.19      |
| Hydrogen     | 3.38      | 4.14      |

*834*

## 7. 1-(1*H*-1,2,4-Triazol-3-yl)-1*H*-tetrazole (9)

### a. <sup>1</sup>H NMR

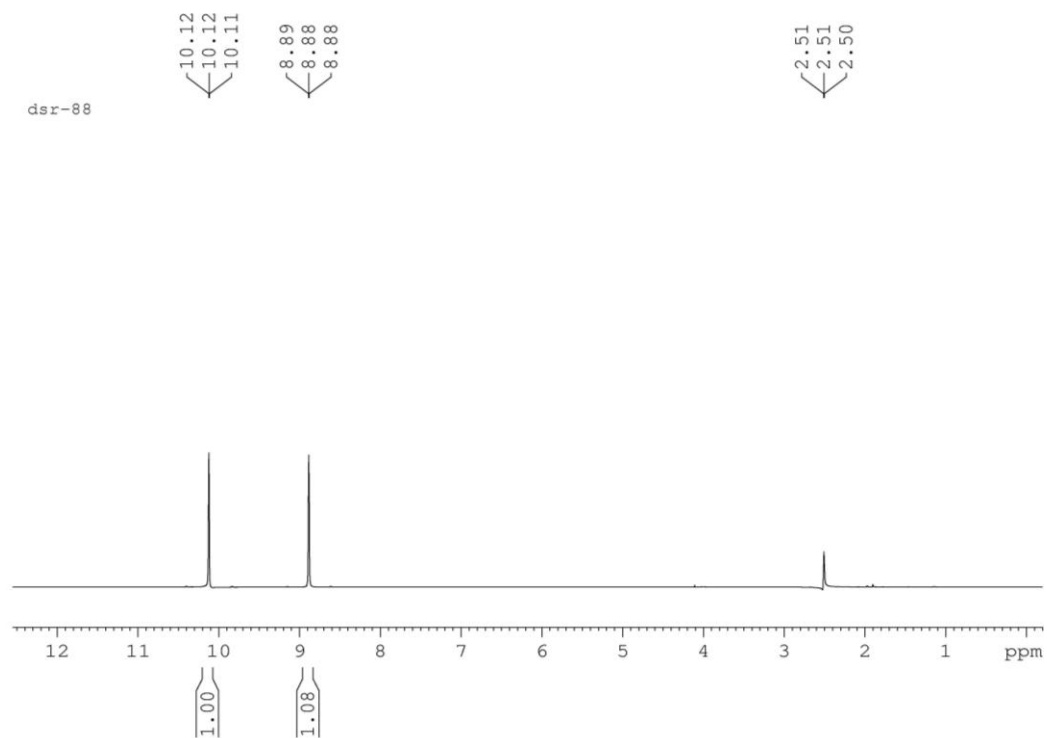

### b. <sup>13</sup>C NMR

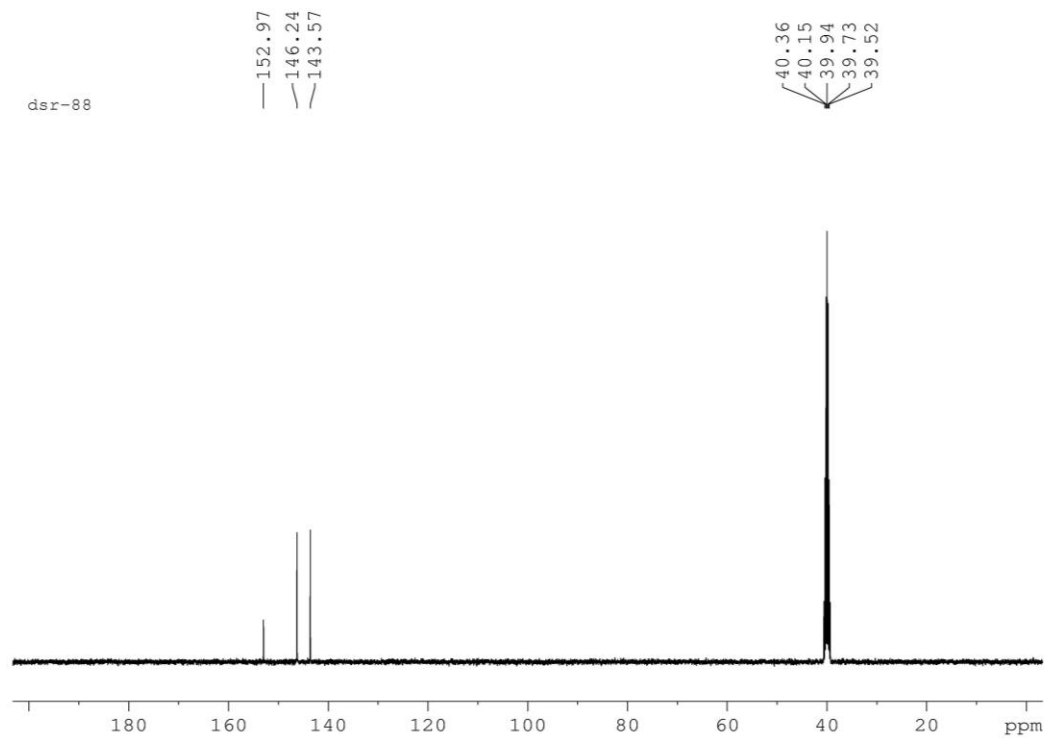

### c. DEPT

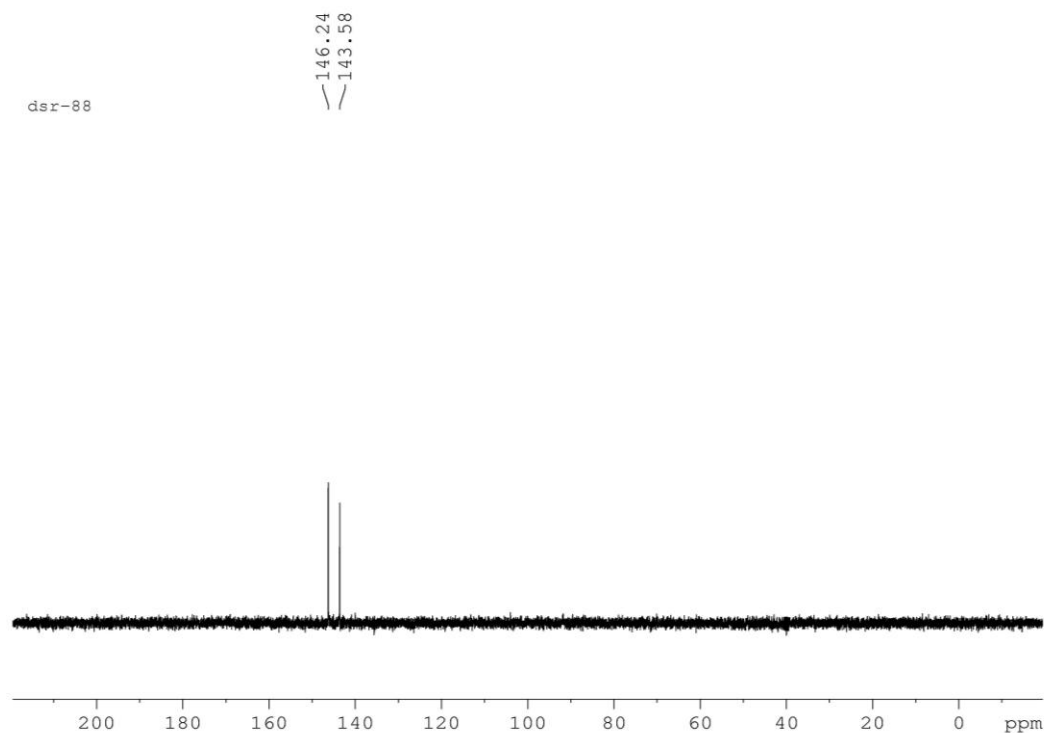

### d. TG-DTA measurement

Sample: dsr-88  
Size: 1.0980 mg  
Method: Ramp

DSC-TGA

File: C:\TA\Data\SDT\srinivasanna\dsr-88.001  
Operator: gsreddy  
Run Date: 02-Nov-12 10:34  
Instrument: SDT Q600 V20.9 Build 20

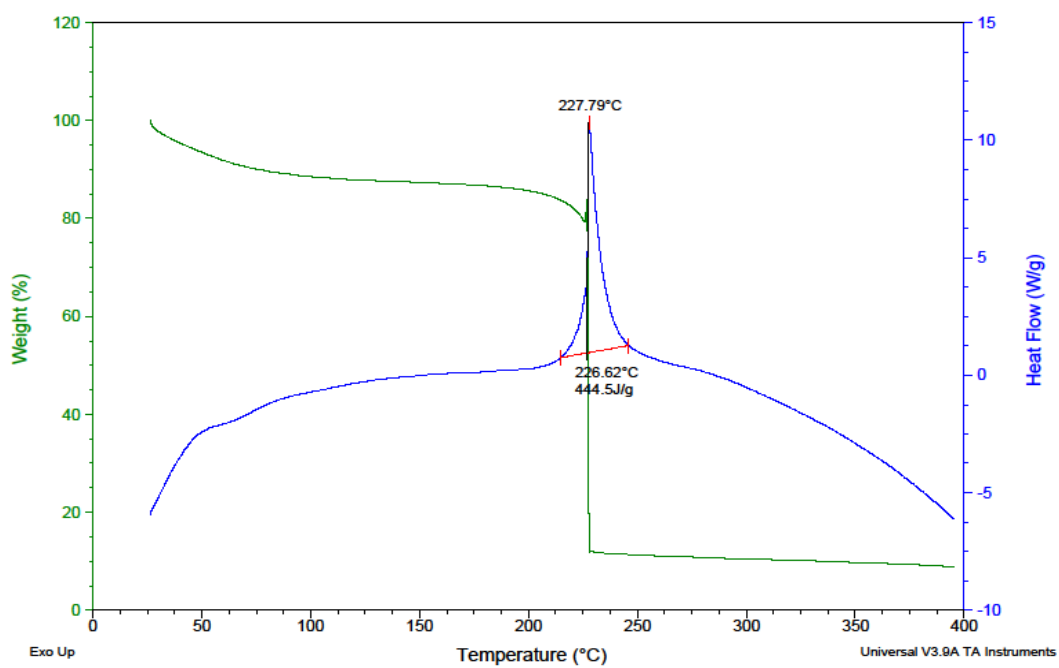



e. HRMS

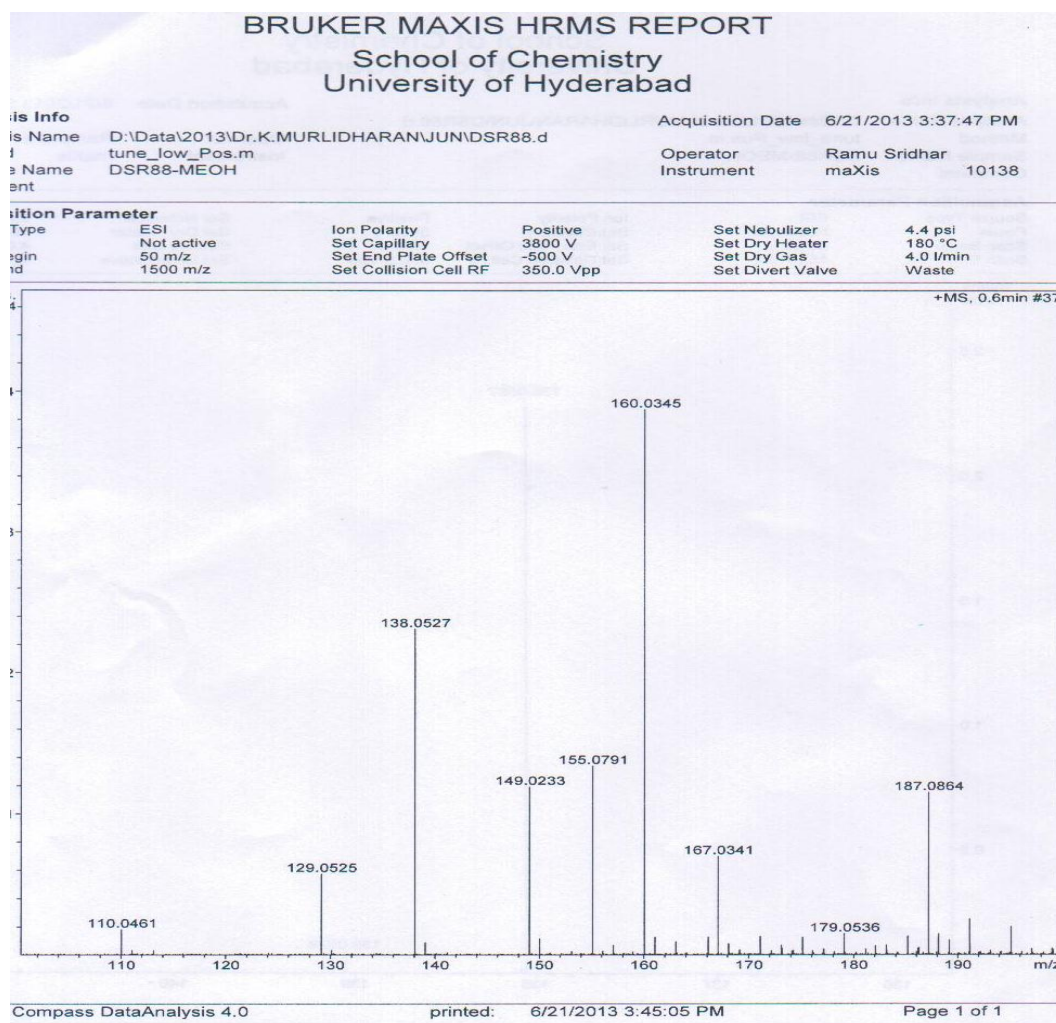

f. CHN analysis

FLASH EA 1112 SERIES CHN REPORT  
SCHOOL OF CHEMISTRY  
UNIVERSITY OF HYDERABAD

Method filename: E:\Program Files\Thermo Finnigan\Eager 300 for EA1112\DATA\Sys\_data\_ex  
Sample ID: DSR-88 (# 103)  
Analysis type: UnkNown  
Chromatogram filename: UNK-20022013-23.dat  
Sample weight: .967

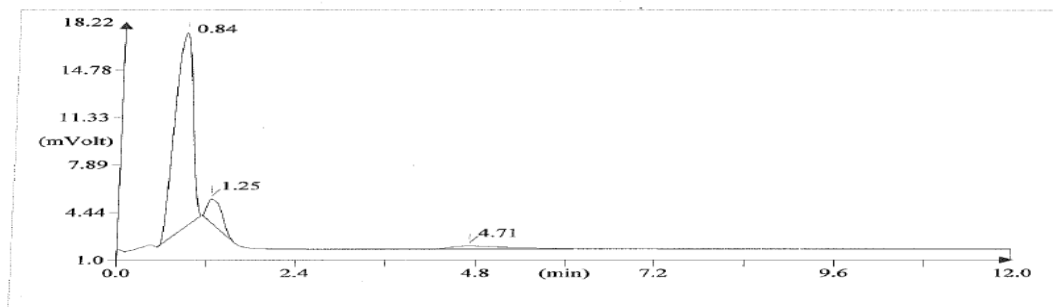

| Element Name | Element % | Ret. Time |
|--------------|-----------|-----------|
| Nitrogen     | 72.21     | 0.84      |
| Carbon       | 26.58     | 1.25      |
| Hydrogen     | 1.42      | 4.71      |

*CBZ*

## 8. Diaminomethaniminium 3-(1H-tetrazol-1-yl)-1,2,4-triazol-1-ide (9a)

### a. $^1\text{H}$ NMR

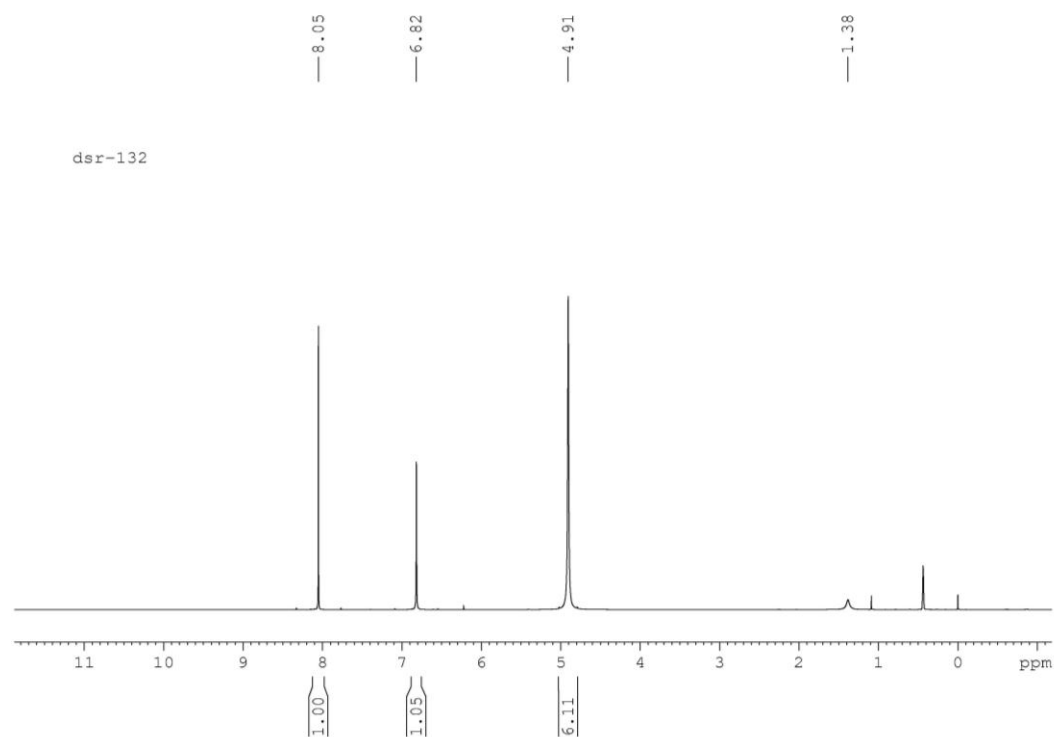

### b. $^{13}\text{C}$ NMR

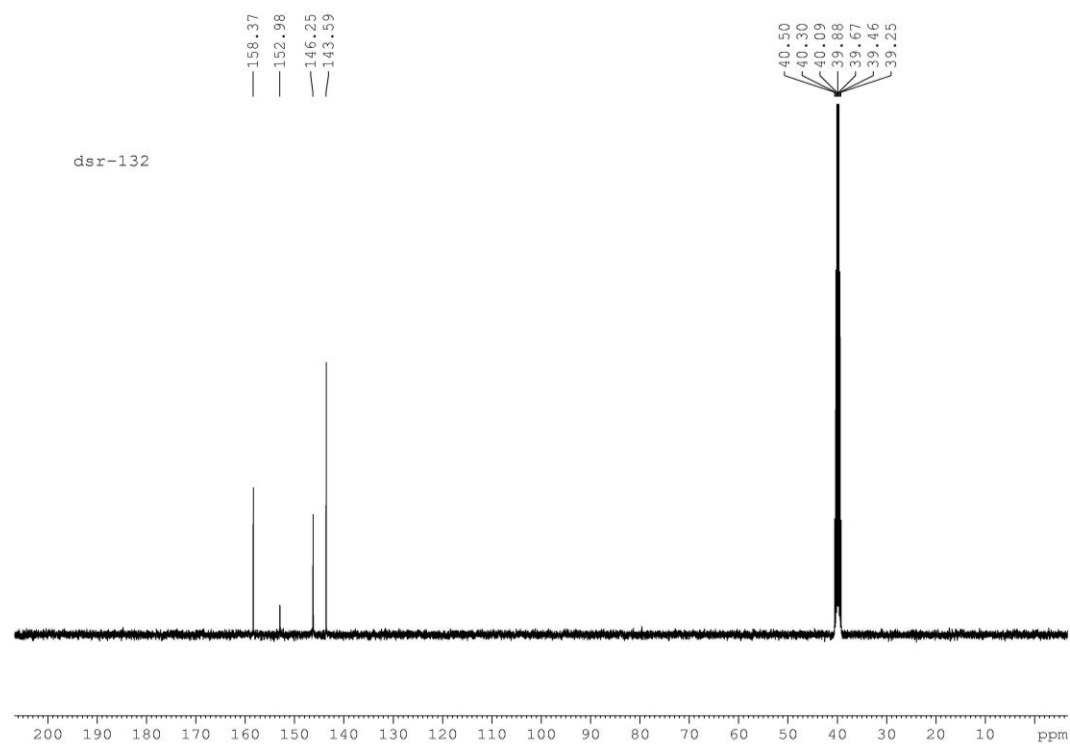

### c. DEPT

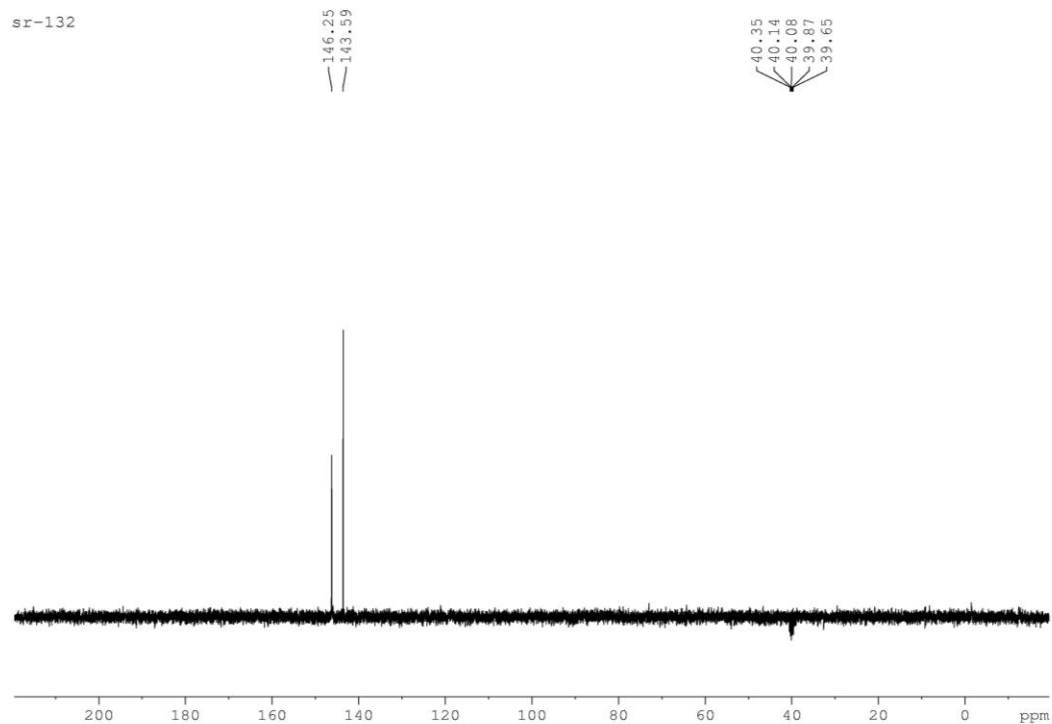

### d. TG-DTA measurement

Sample: DSR-132  
Size: 2.9970 mg  
Method: Ramp

#### DSC-TGA

File: C:\TADData\SDT\srinivasanna\dsr-132.002  
Operator: gsreddy  
Run Date: 03-Nov-12 12:34  
Instrument: SDT Q600 V20.9 Build 20

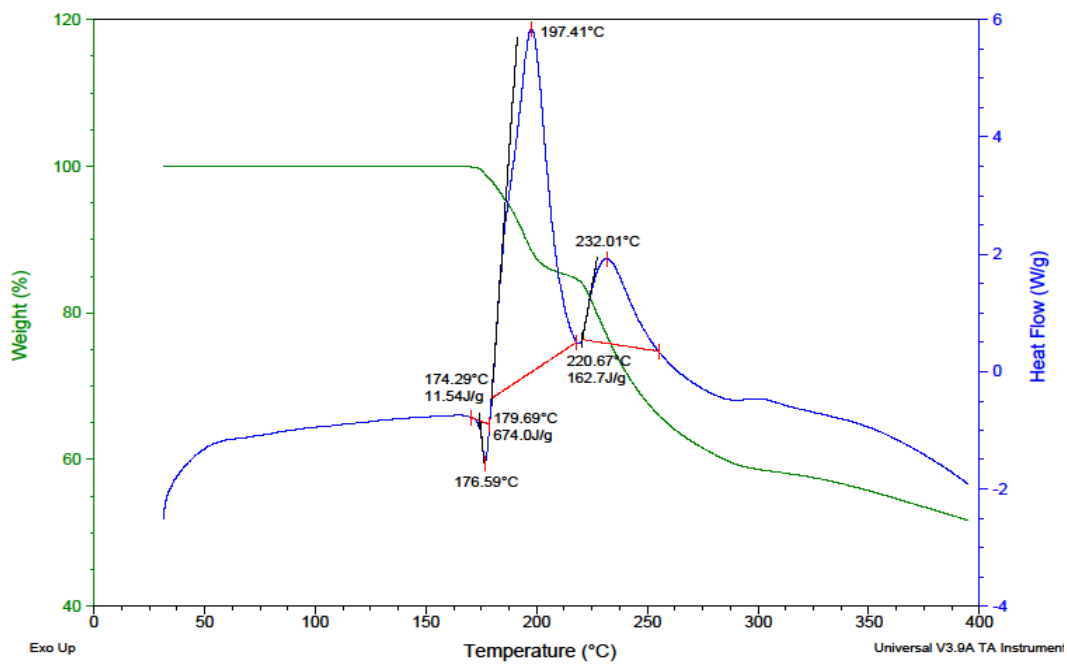

e. HRMS

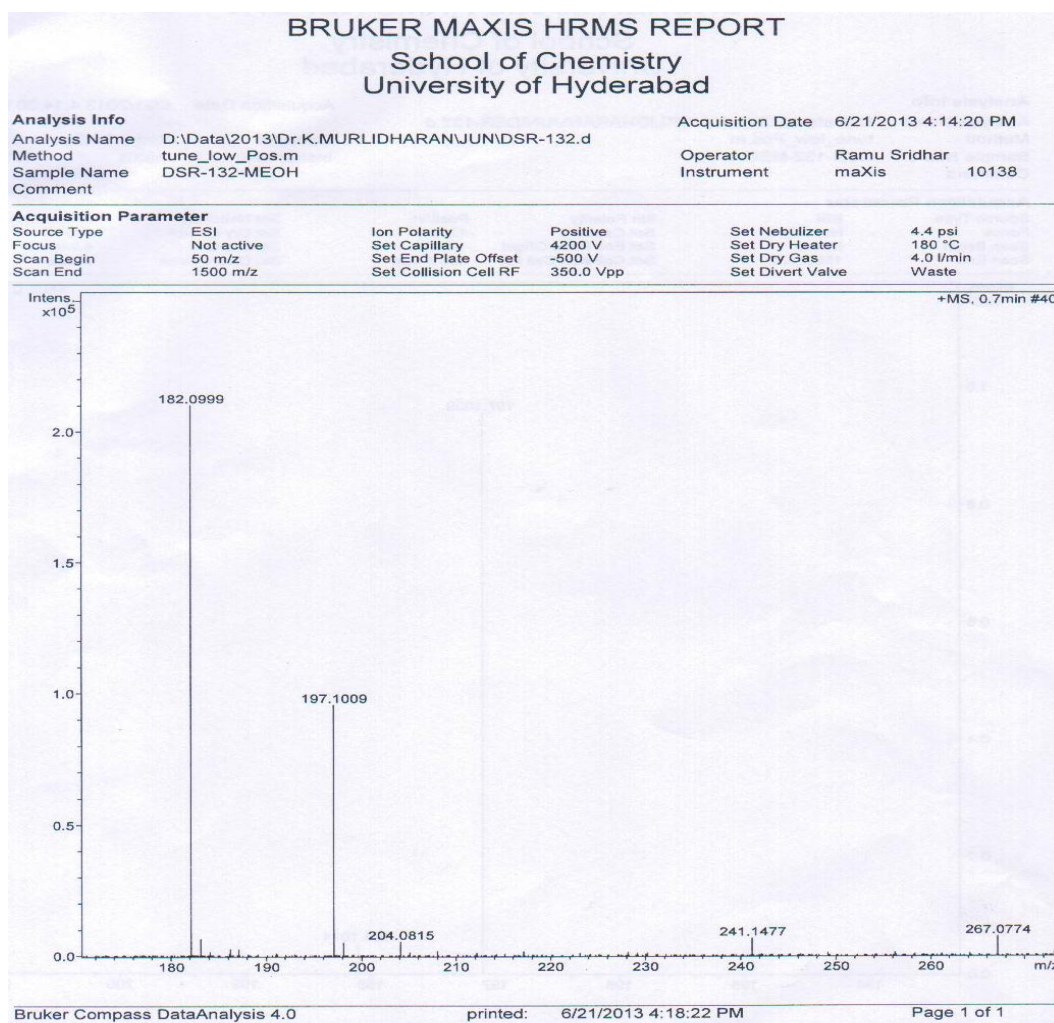

f. CHN analysis

FLASH EA 1112 SERIES CHN REPORT  
SCHOOL OF CHEMISTRY  
UNIVERSITY OF HYDERABAD

Method filename: E:\Program Files\Thermo Finnigan\Eager 300 for EA1112\DATA\Sys\_data\_ex  
Sample ID: DSR-132 (# 97)  
Analysis type: UnkNown  
Chromatogram filename: UNK-20022013-17.dat  
Sample weight: 1.481

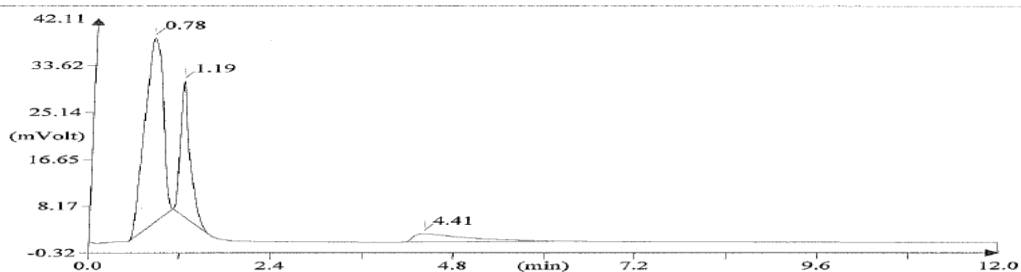

| Element Name | Element % | Ret. Time |
|--------------|-----------|-----------|
| Nitrogen     | 71.52     | 0.78      |
| Carbon       | 24.56     | 1.19      |
| Hydrogen     | 4.06      | 4.41      |

*Handwritten signature*

## 9. (Hydrazinylcarbonyl)hydrazinium 3-(1*H*-tetrazol-1-yl)-1,2,4-triazol-1-ide (9b)

### a. <sup>1</sup>H NMR

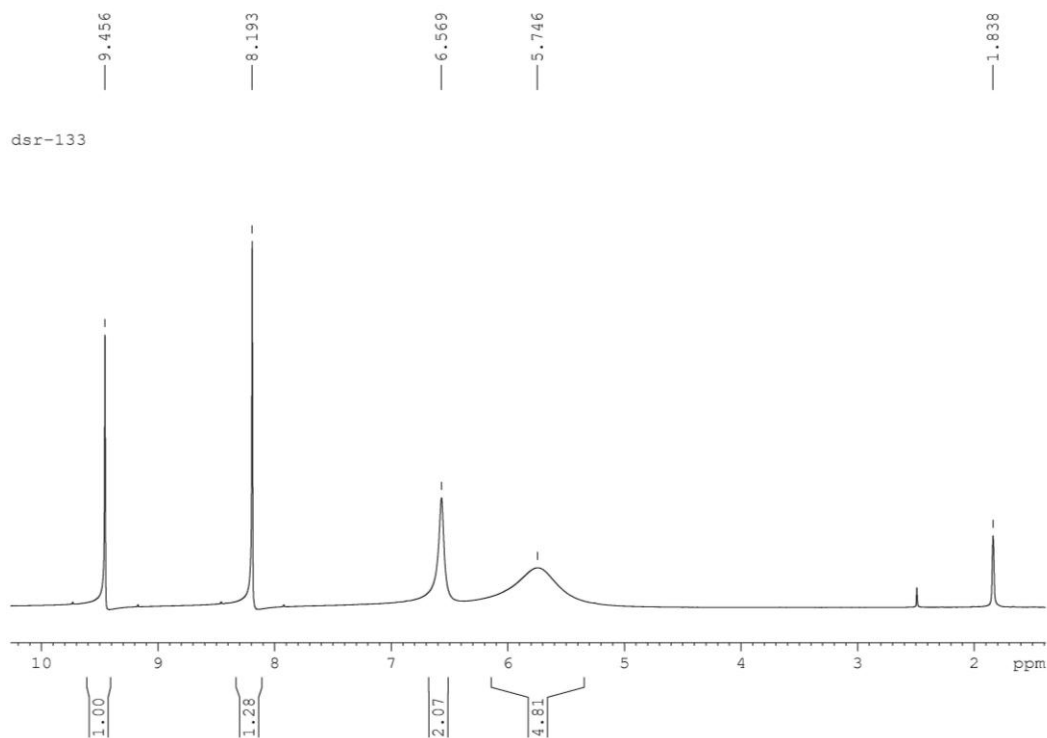

### b. <sup>13</sup>C NMR

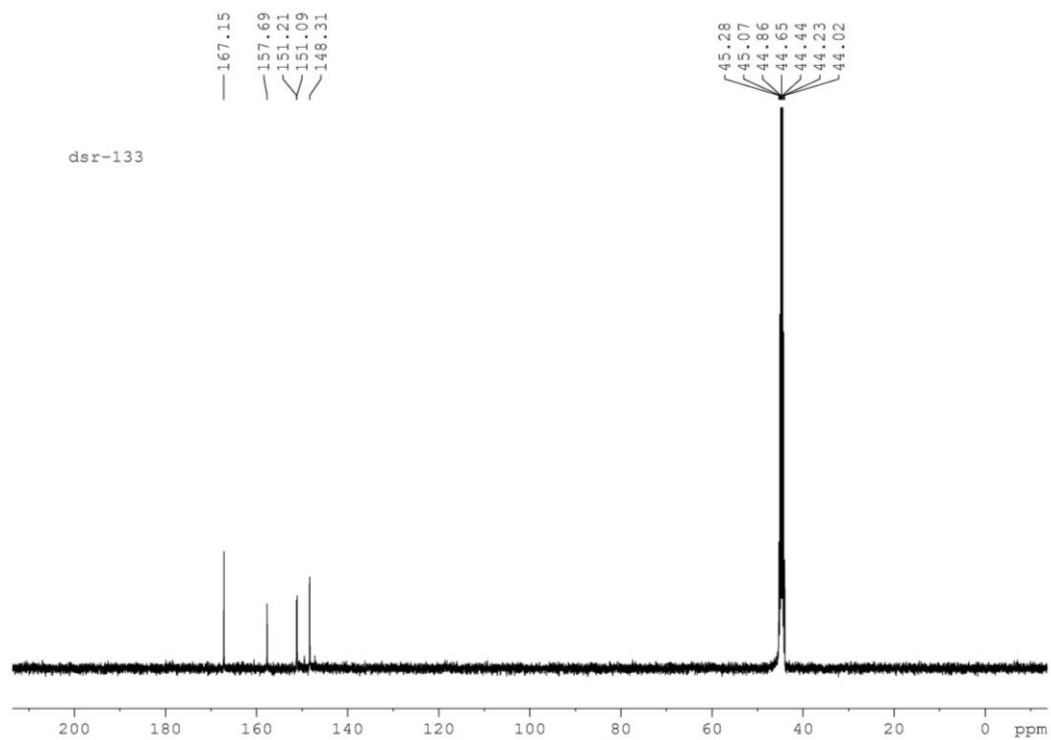

c. DEPT

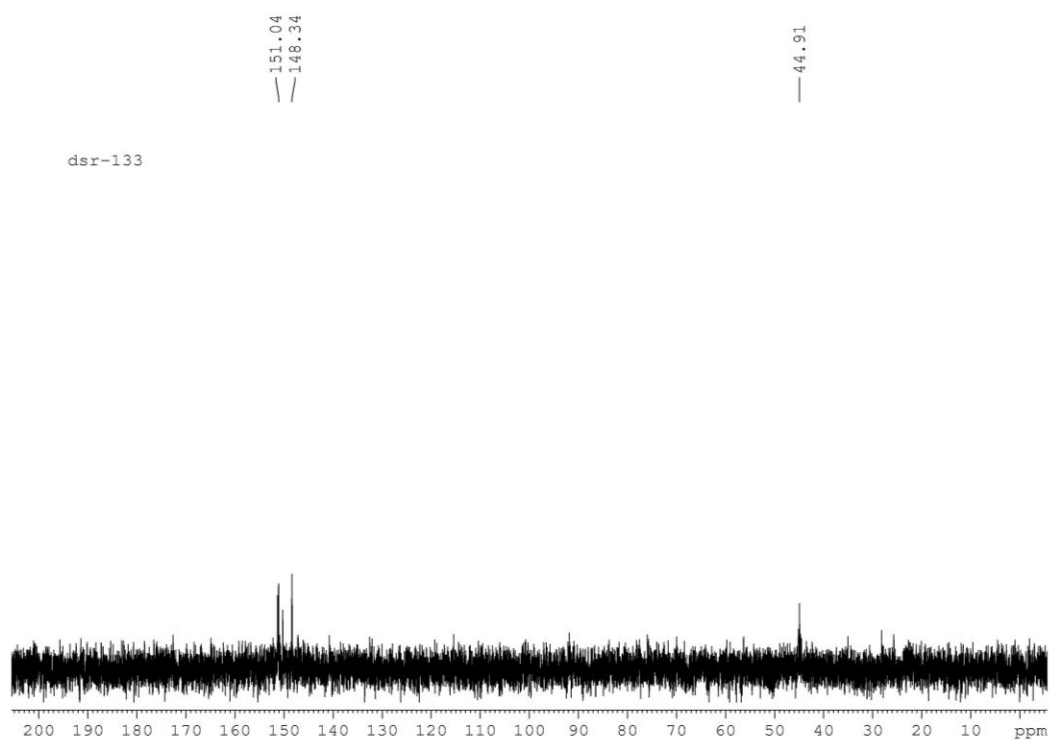

d. TG-DTA measurement

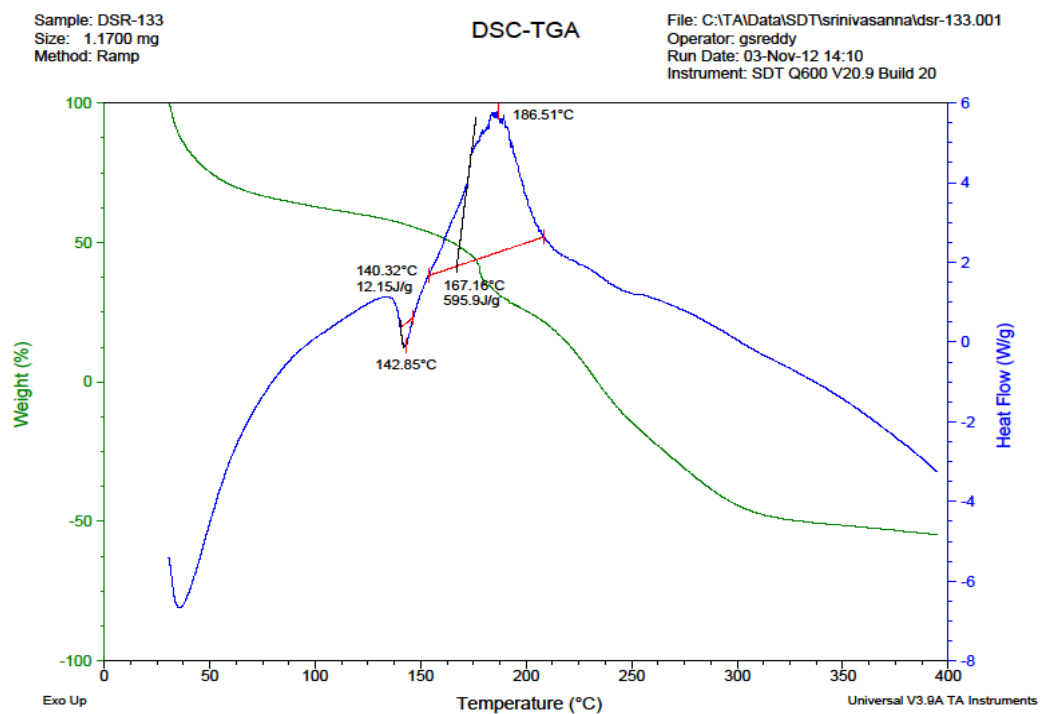



e. C H N analysis

FLASH EA 1112 SERIES CHN REPORT  
SCHOOL OF CHEMISTRY  
UNIVERSITY OF HYDERABAD

Method filename: E:\Program Files\Thermo Finnigan\Eager 300 for EA\1112\DATA\Sys\_data\_ex  
Sample ID: DSR-133 (# 102)  
Analysis type: UnkNown  
Chromatogram filename: UNK-20022013-22.dat  
Sample weight: .973

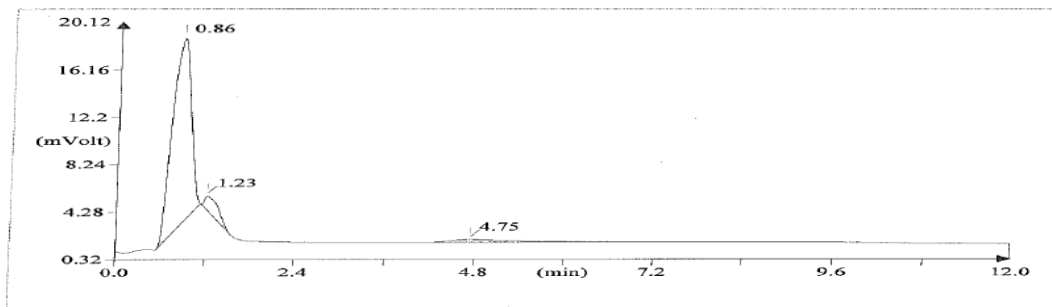

| Element Name | Element % | Ret. Time |
|--------------|-----------|-----------|
| Nitrogen     | 67.72     | 0.86      |
| Carbon       | 21.06     | 1.23      |
| Hydrogen     | 3.91      | 4.75      |

*CSN*

### 10. 4-Amino-4*H*-1,2,4-triazol-1-ium 3-(1*H*-tetrazol-1-yl)-1,2,4-triazol-1-ide (9c)

#### a. $^1\text{H}$ NMR

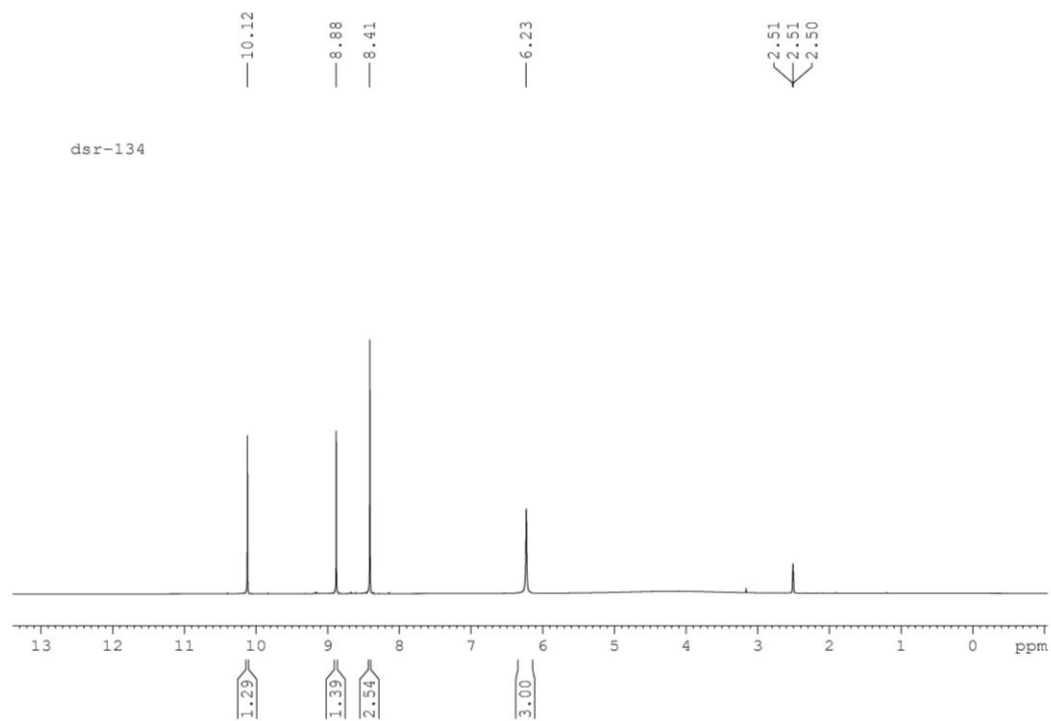

#### b. $^{13}\text{C}$ NMR

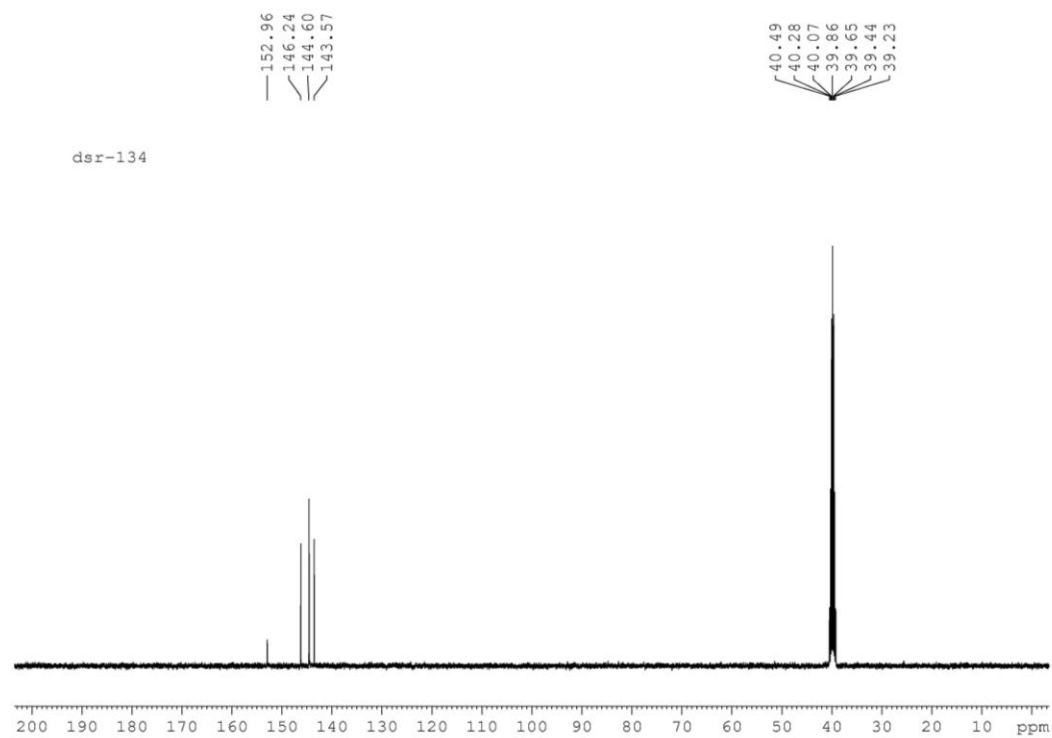

c. DEPT

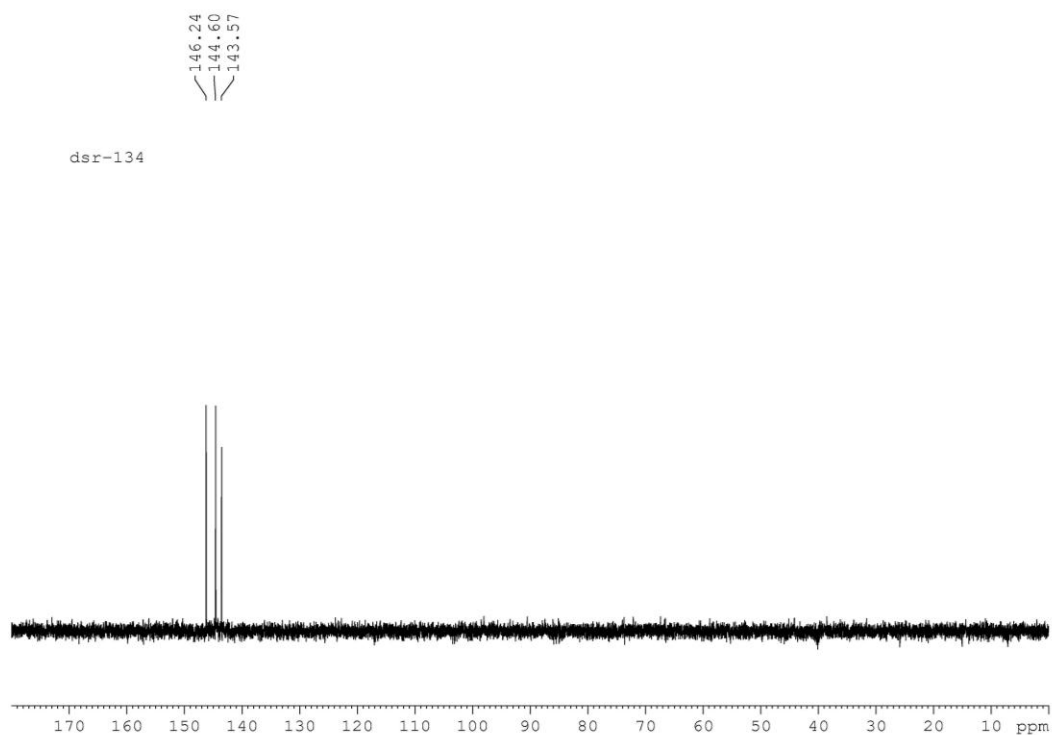

d. TG-DTA measurement

Sample: DSR-134  
Size: 1.7210 mg  
Method: Ramp

DSC-TGA

File: C:\TA\Data\SDT\srinivasanna\dsr-134.001  
Operator: gsreddy  
Run Date: 03-Nov-12 09:17  
Instrument: SDT Q600 V20.9 Build 20

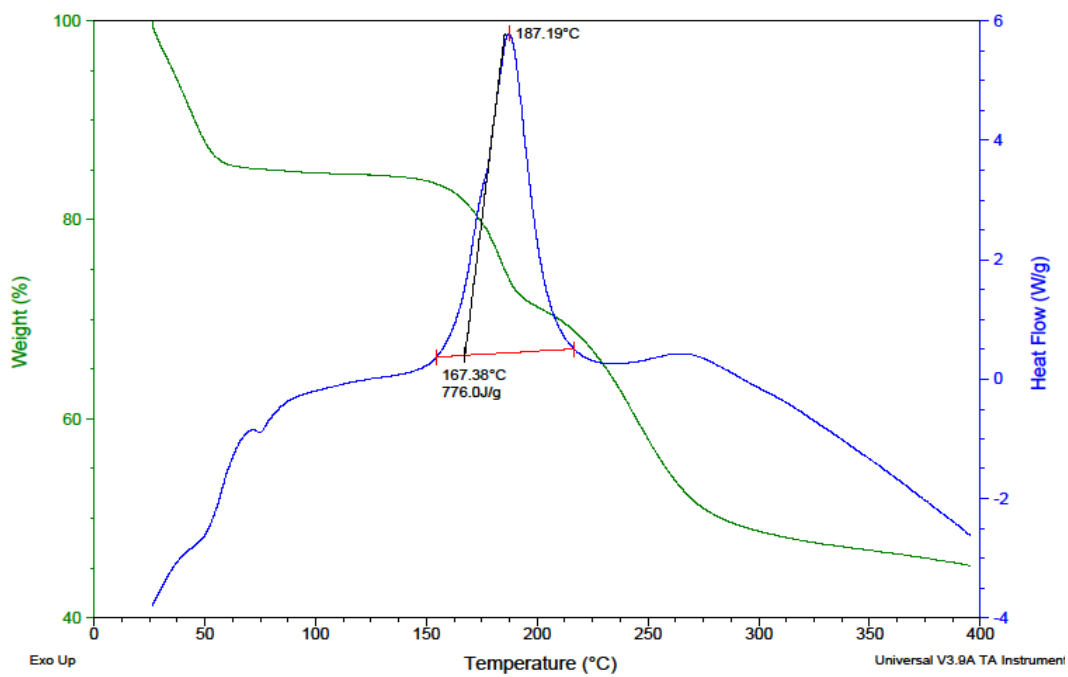

e. HRMS

BRUKER MAXIS HRMS REPORT

School of Chemistry  
University of Hyderabad

|               |                                              |                  |                     |
|---------------|----------------------------------------------|------------------|---------------------|
| Analysis Info |                                              | Acquisition Date | 7/9/2013 4:52:08 PM |
| Analysis Name | D:\Data\2013\Dr.K.MURLIDHARAN\JULY\DSR-134.d | Operator         | Ramu Sridhar        |
| Method        | tune_Low_Pos-R2.m                            | Instrument       | maXis 10138         |
| Sample Name   | DSR-134-MEOH                                 |                  |                     |
| Comment       |                                              |                  |                     |

|                       |            |                       |           |                  |           |
|-----------------------|------------|-----------------------|-----------|------------------|-----------|
| Acquisition Parameter |            |                       |           |                  |           |
| Source Type           | ESI        | Ion Polarity          | Positive  | Set Nebulizer    | 4.4 psi   |
| Source                | Not active | Set Capillary         | 3800 V    | Set Dry Heater   | 180 °C    |
| Scan Begin            | 50 m/z     | Set End Plate Offset  | -500 V    | Set Dry Gas      | 4.0 l/min |
| Scan End              | 2580 m/z   | Set Collision Cell RF | 350.0 Vpp | Set Divert Valve | Waste     |

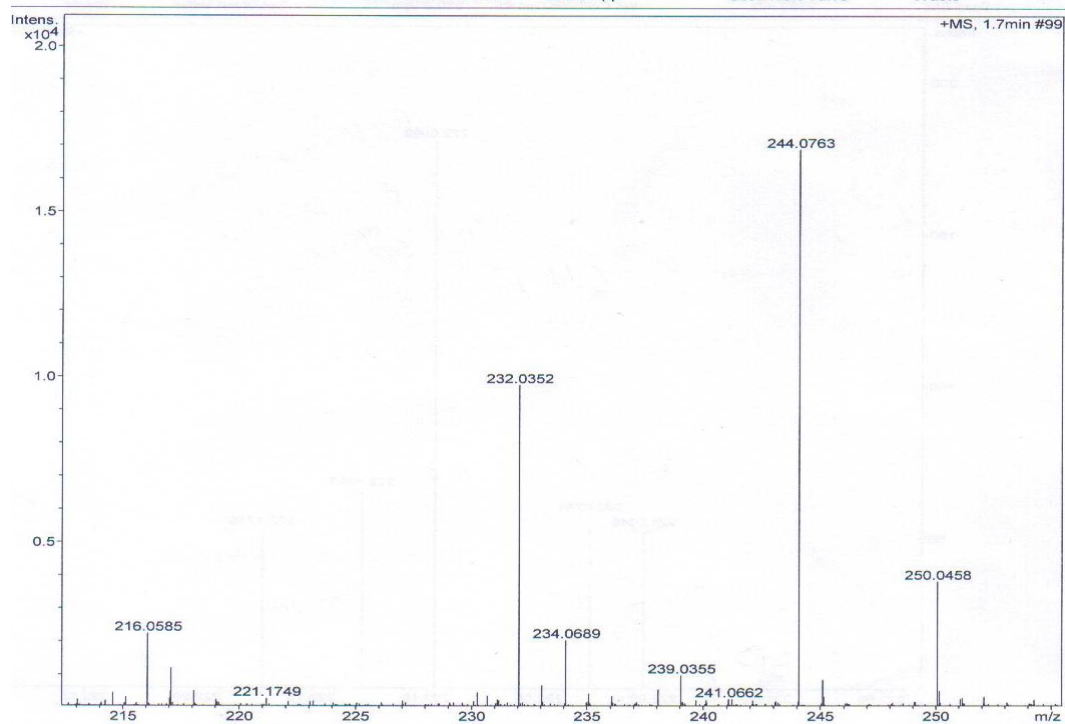

f. C H N analysis

FLASH EA 1112 SERIES CHN REPORT  
SCHOOL OF CHEMISTRY  
UNIVERSITY OF HYDERABAD

Method filename: E:\Program Files\Thermo Finnigan\Eager 300 for EA1112\DATA\Sys\_data\_ex  
Sample ID: DSR-134 (# 104)  
Analysis type: UnkNown  
Chromatogram filename: UNK-20022013-24.dat  
Sample weight: .955

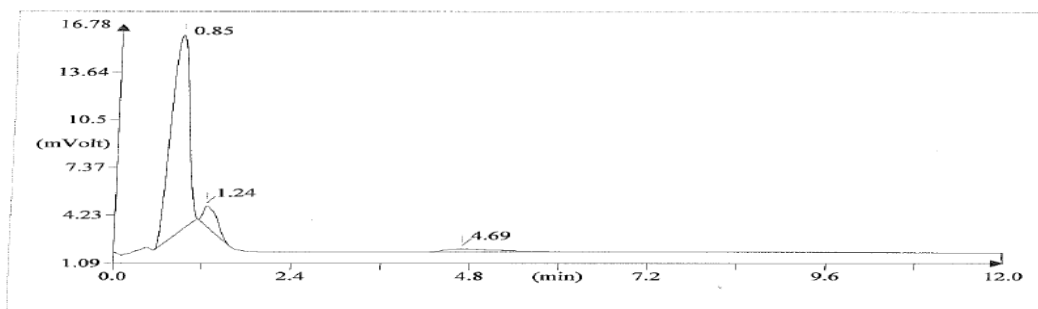

| Element Name | Element % | Ret. Time |
|--------------|-----------|-----------|
| Nitrogen     | 69.51     | 0.85      |
| Carbon       | 27.06     | 1.24      |
| Hydrogen     | 3.25      | 4.89      |

*ask*

### 11. 3-Amino-1*H*-1,2,4-triazol-4-ium 3-(1*H*-tetrazol-1-yl)-1,2,4-triazol-1-ide (9d)

#### a. <sup>1</sup>H NMR

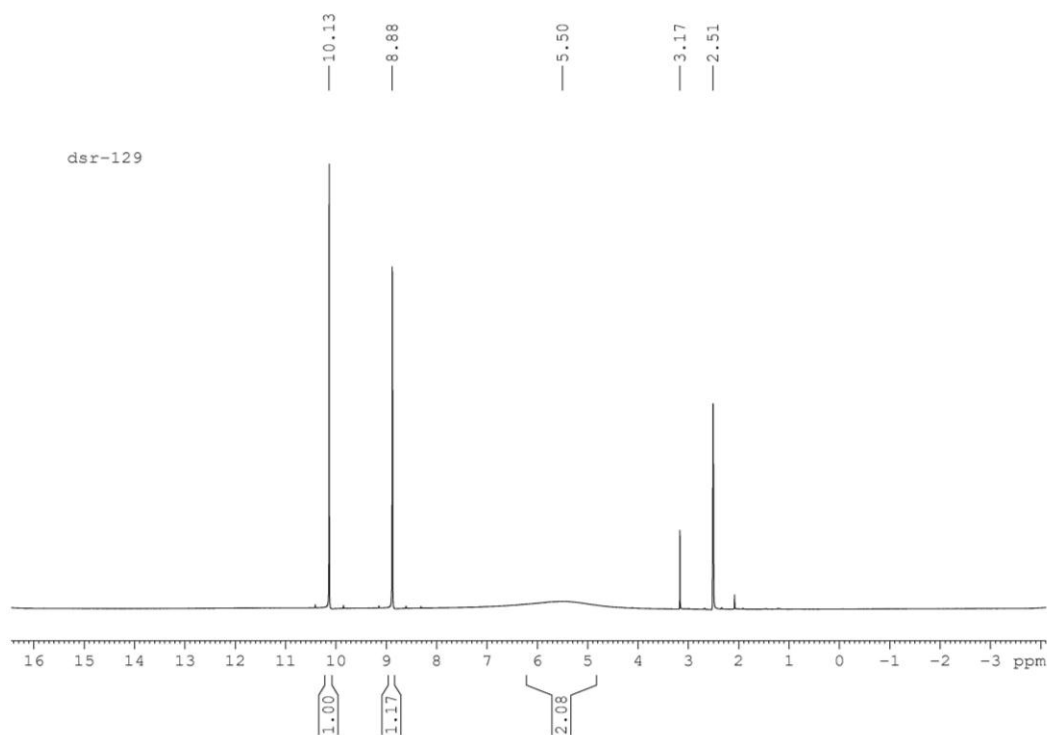

#### b. <sup>13</sup>C NMR

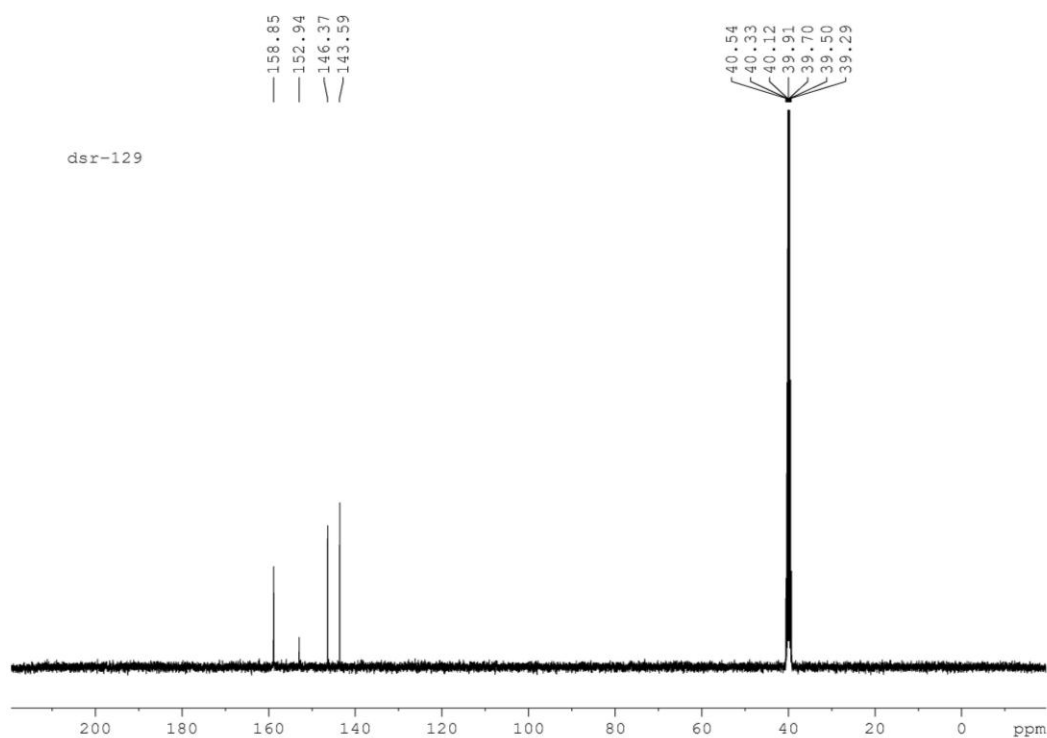

### c. DEPT

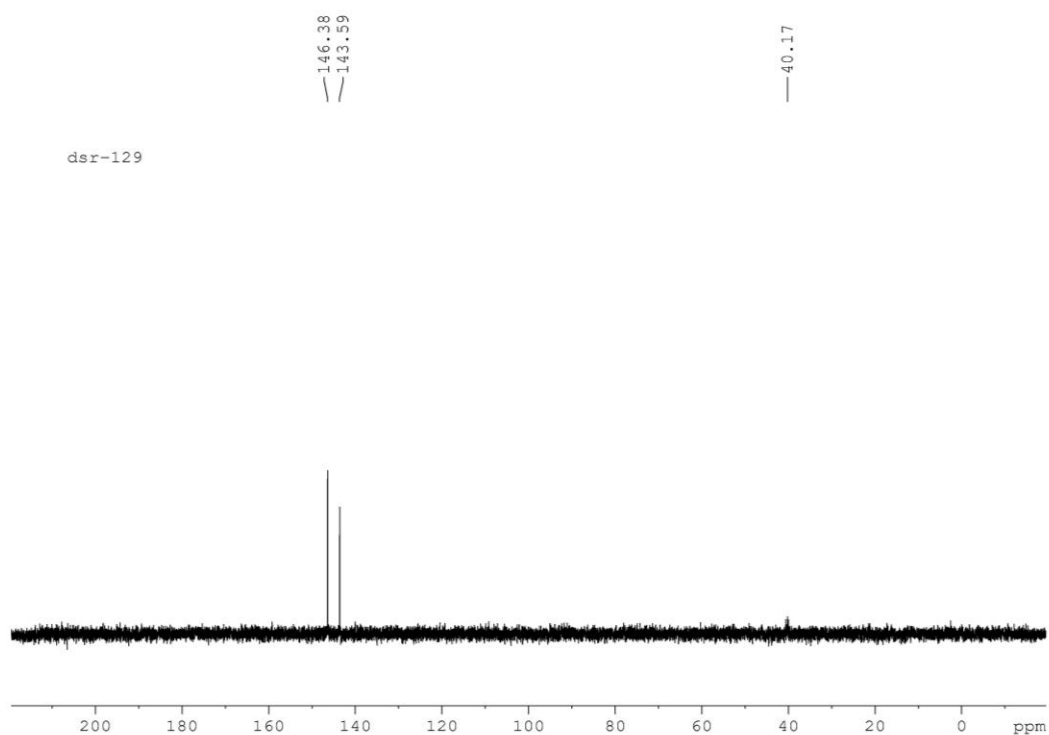

### d. TG-DTA measurement

Sample: dsr-129  
Size: 1.4000 mg  
Method: Ramp

DSC-TGA

File: C:\TAData\SDT\srinivasanna\dsr-129.002  
Operator: gsreddy  
Run Date: 02-Nov-12 14:00  
Instrument: SDT Q600 V20.9 Build 20

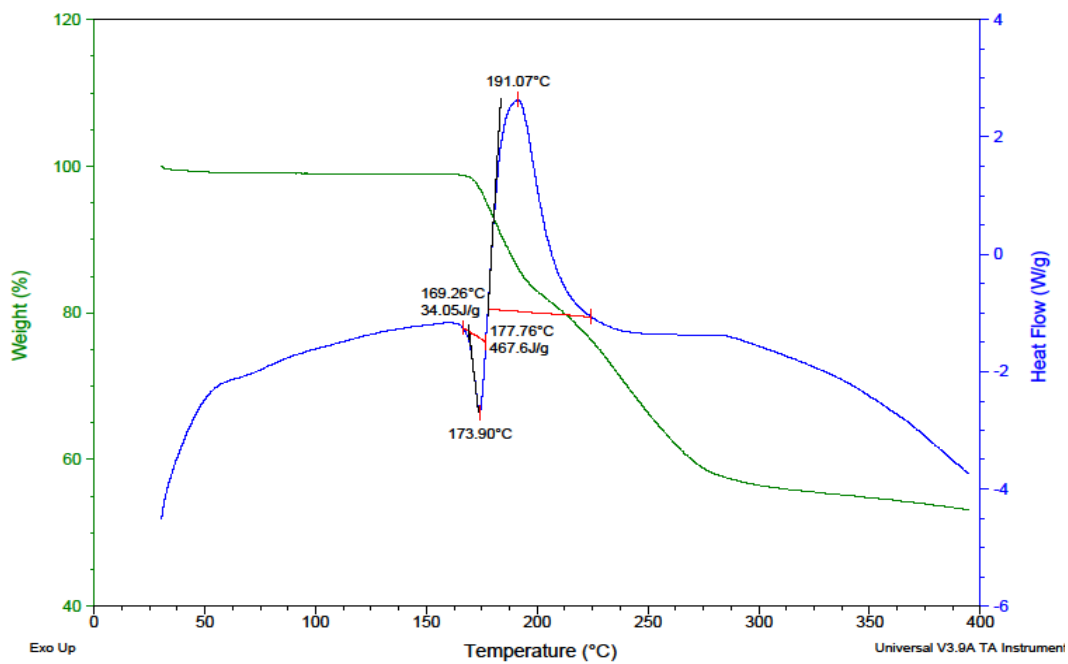

e. C H N analysis

FLASH EA 1112 SERIES CHN REPORT  
SCHOOL OF CHEMISTRY  
UNIVERSITY OF HYDERABAD

Method filename: E:\Program Files\Thermo Finnigan\Eager 300 for EA1112\DATA\Sys\_data\_ex  
Sample ID: DSR-129 (# 96)  
Analysis type: UnKnown  
Chromatogram filename: UNK-20022013-16.dat  
Sample weight: 1.472

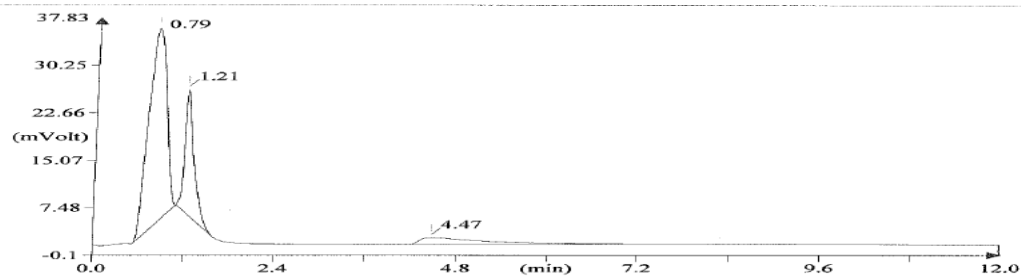

| Element Name | Element % | Ret. Time |
|--------------|-----------|-----------|
| Nitrogen     | 69.52     | 0.79      |
| Carbon       | 27.06     | 1.21      |
| Hydrogen     | 3.24      | 4.47      |

*BL*



## 12. 3,5-Diamino-1*H*-1,2,4-triazol-4-ium 3-(1*H*-tetrazol-1-yl)-1,2,4-triazol-1-ide (9e)

### a. <sup>1</sup>H NMR

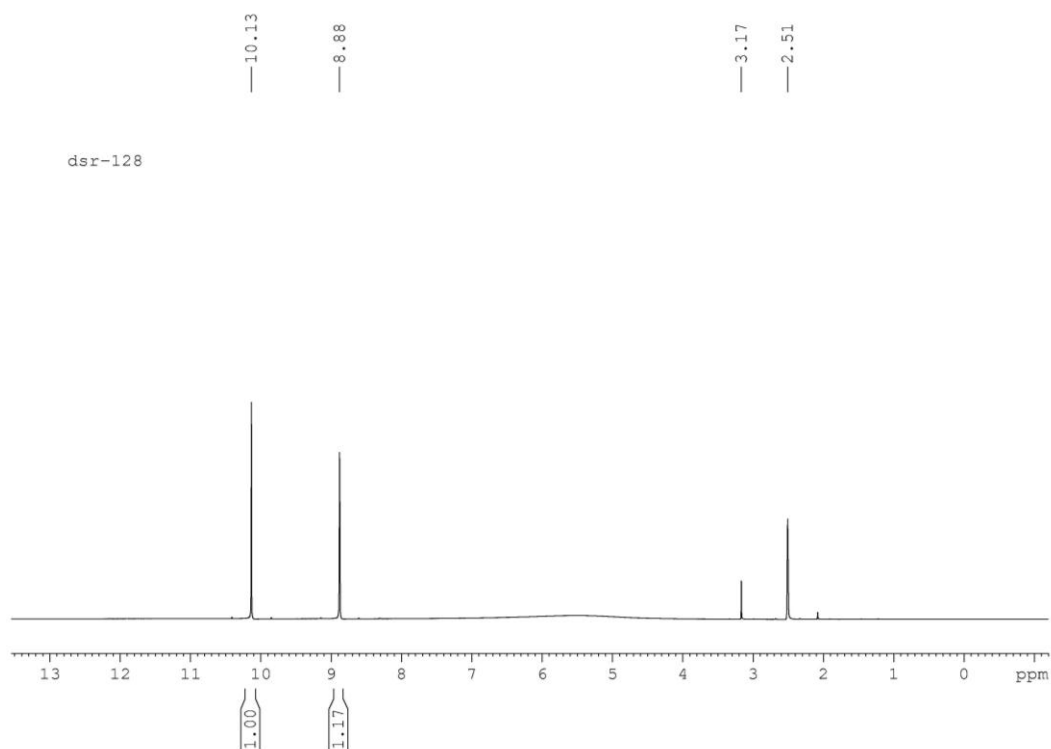

### b. <sup>13</sup>C NMR

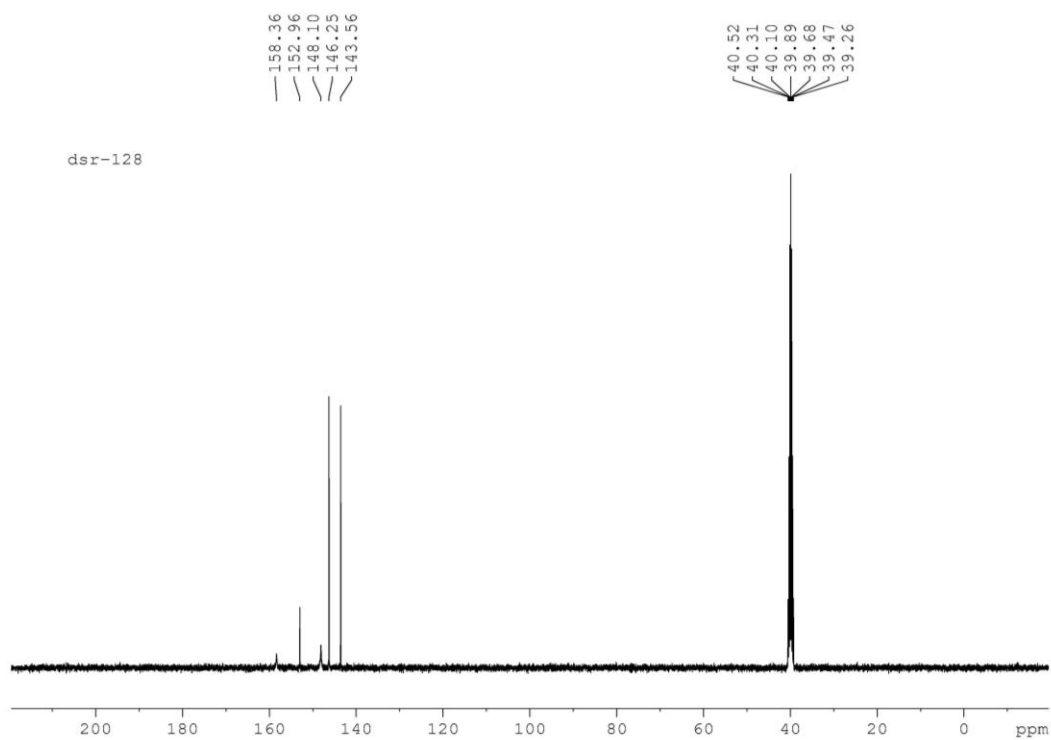

### c. DEPT

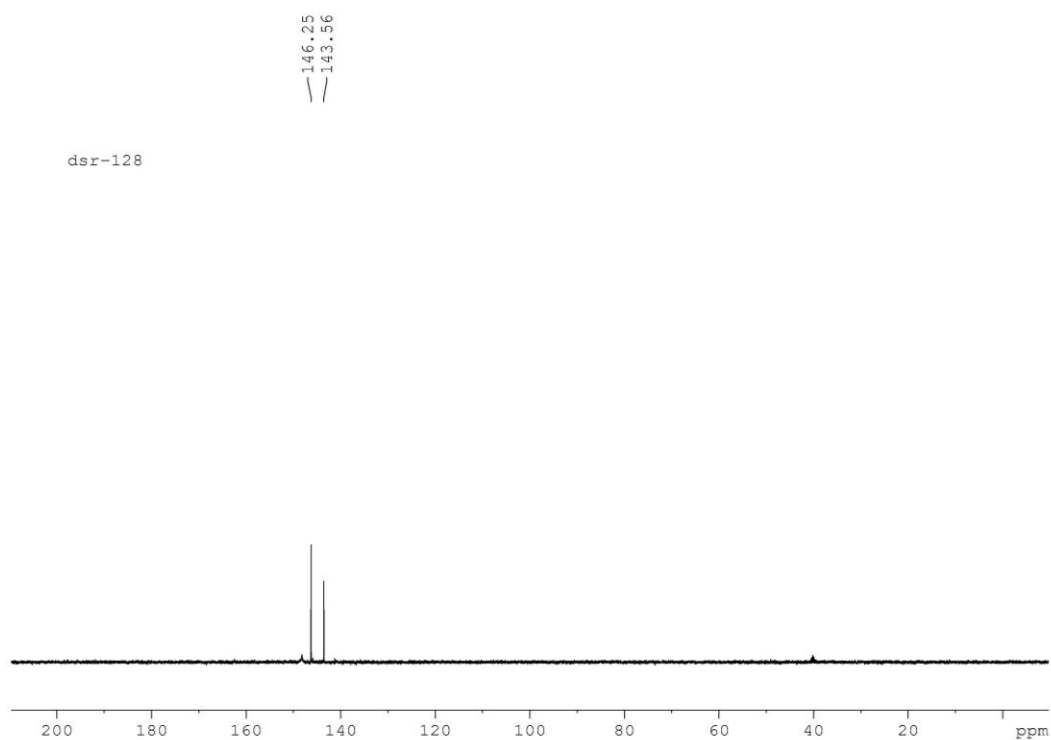

### d. TG-DTA measurement

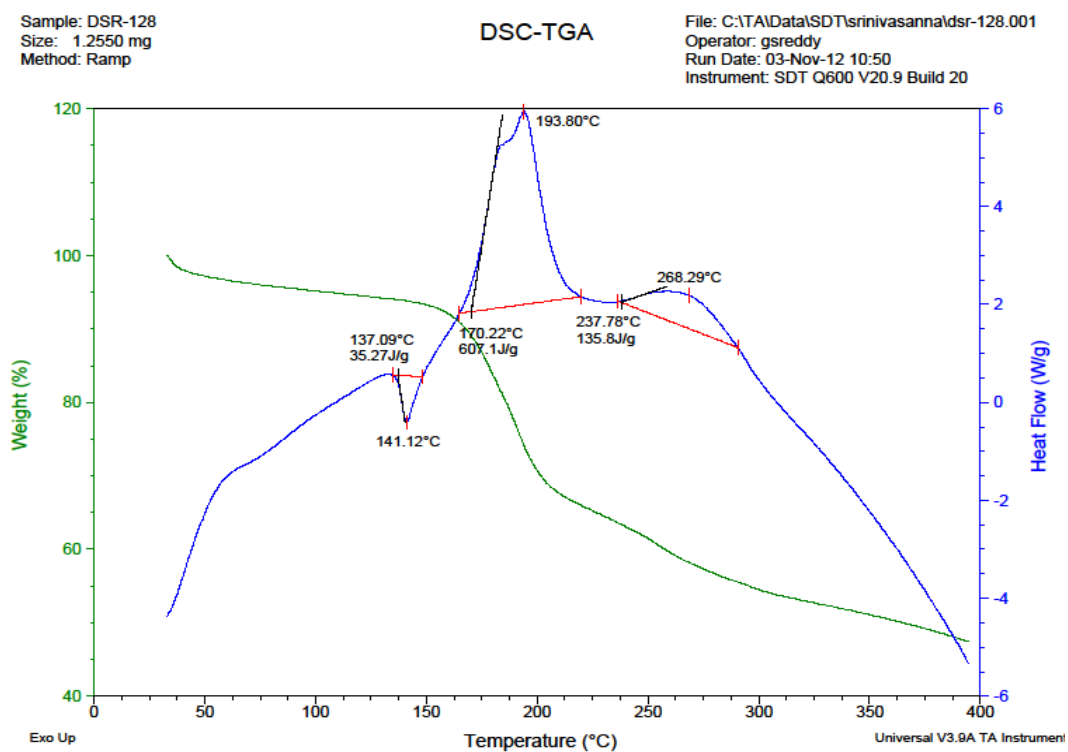

e. C H N analysis

FLASH EA 1112 SERIES CHN REPORT  
SCHOOL OF CHEMISTRY  
UNIVERSITY OF HYDERABAD

ethod filename: E:\Program Files\Thermo Finnigan\Eager 300 for EA1112\DATA\Sys\_data\_ex  
mple ID: DSR-128 (# 107)  
alysis type: UnkNown  
romatogram filename: UNK-20022013-27.dat  
mple weight: .731

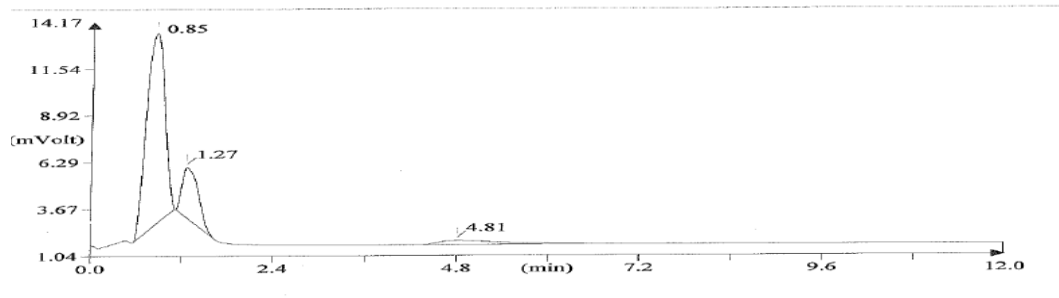

| Element Name | Element % | Ret. Time |
|--------------|-----------|-----------|
| Nitrogen     | 71.32     | 0.85      |
| Carbon       | 25.51     | 1.27      |
| Hydrogen     | 3.36      | 4.81      |

*CSL*

### 13. 5-(1*H*-Tetrazol-1-yl)-1*H*-1,2,4-triazol-3-amine (10)

#### a. <sup>1</sup>H NMR

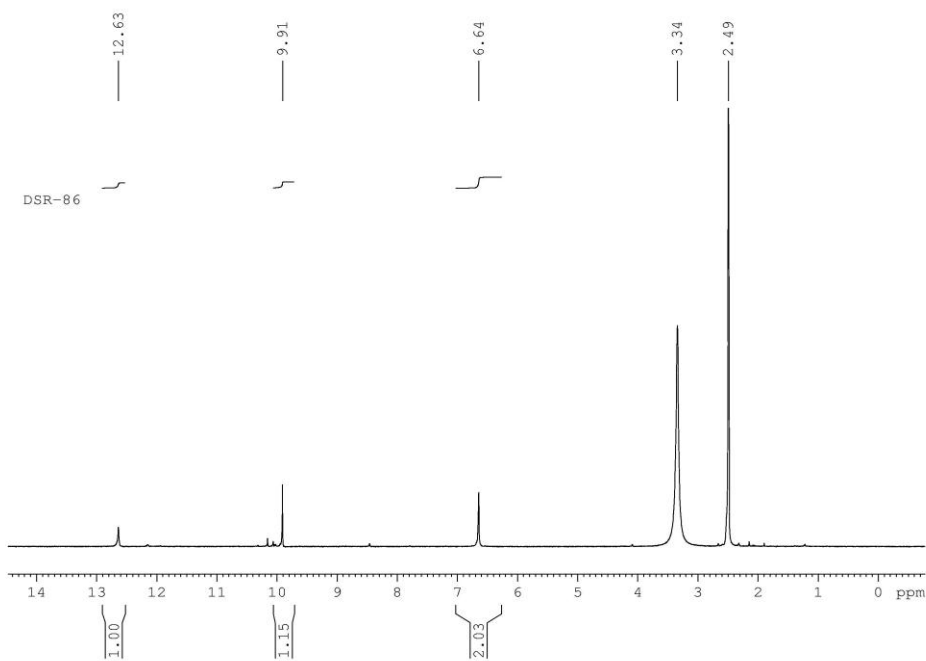

#### b. <sup>1</sup>H NMR (D<sub>2</sub>O exchange)

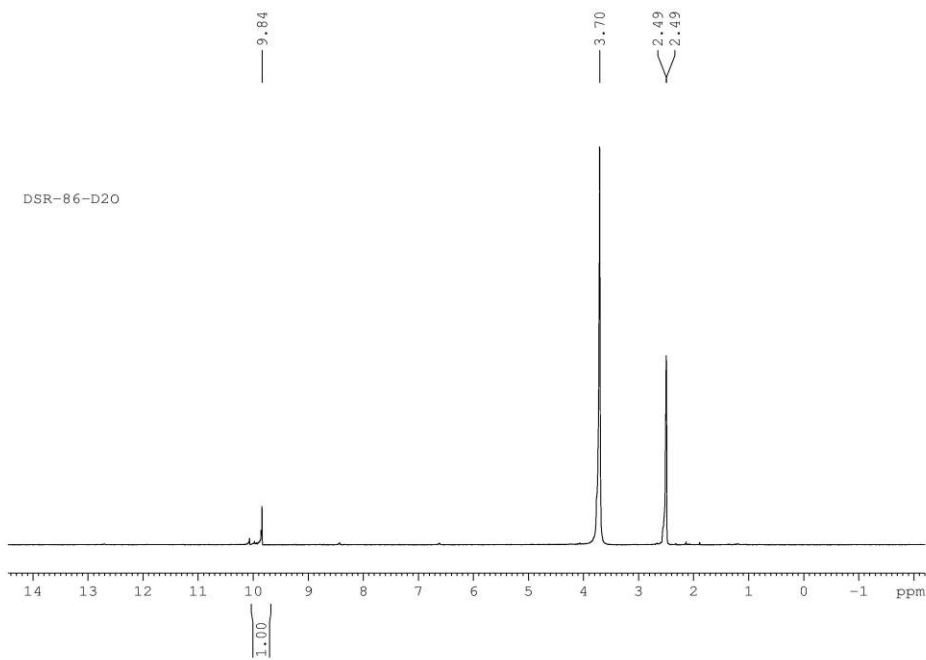

c.  $^{13}\text{C}$  NMR

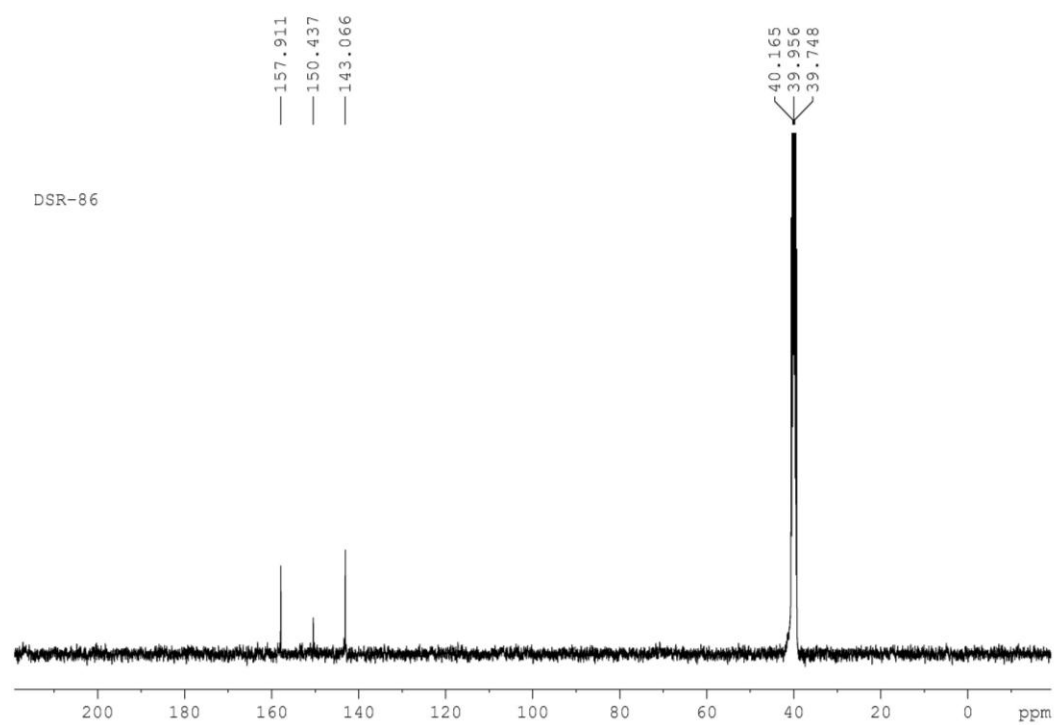

d. DEPT

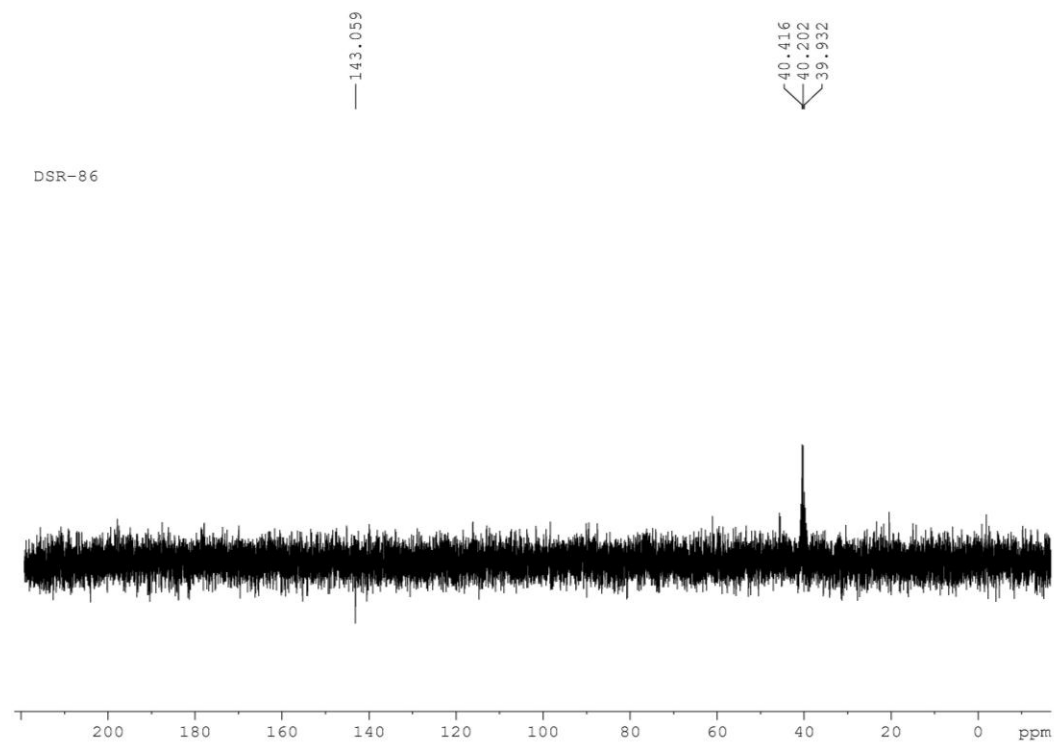

### e. TG-DTA measurement

Sample: DSR-86  
Size: 1.3120 mg  
Method: Ramp

DSC-TGA

File: C:\...SDT\Anuj\New Folder (5)\DSR-86.001  
Operator: AN  
Run Date: 13-Jun-2013 15:55  
Instrument: SDT Q600 V20.9 Build 20

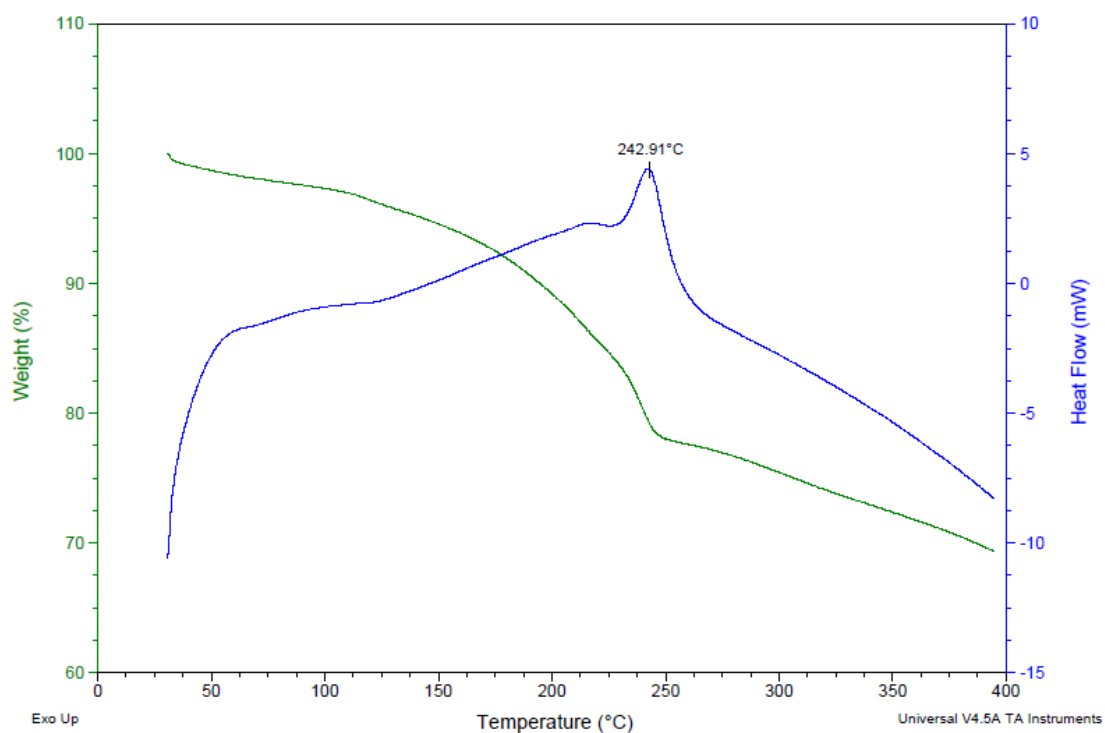

e. HRMS

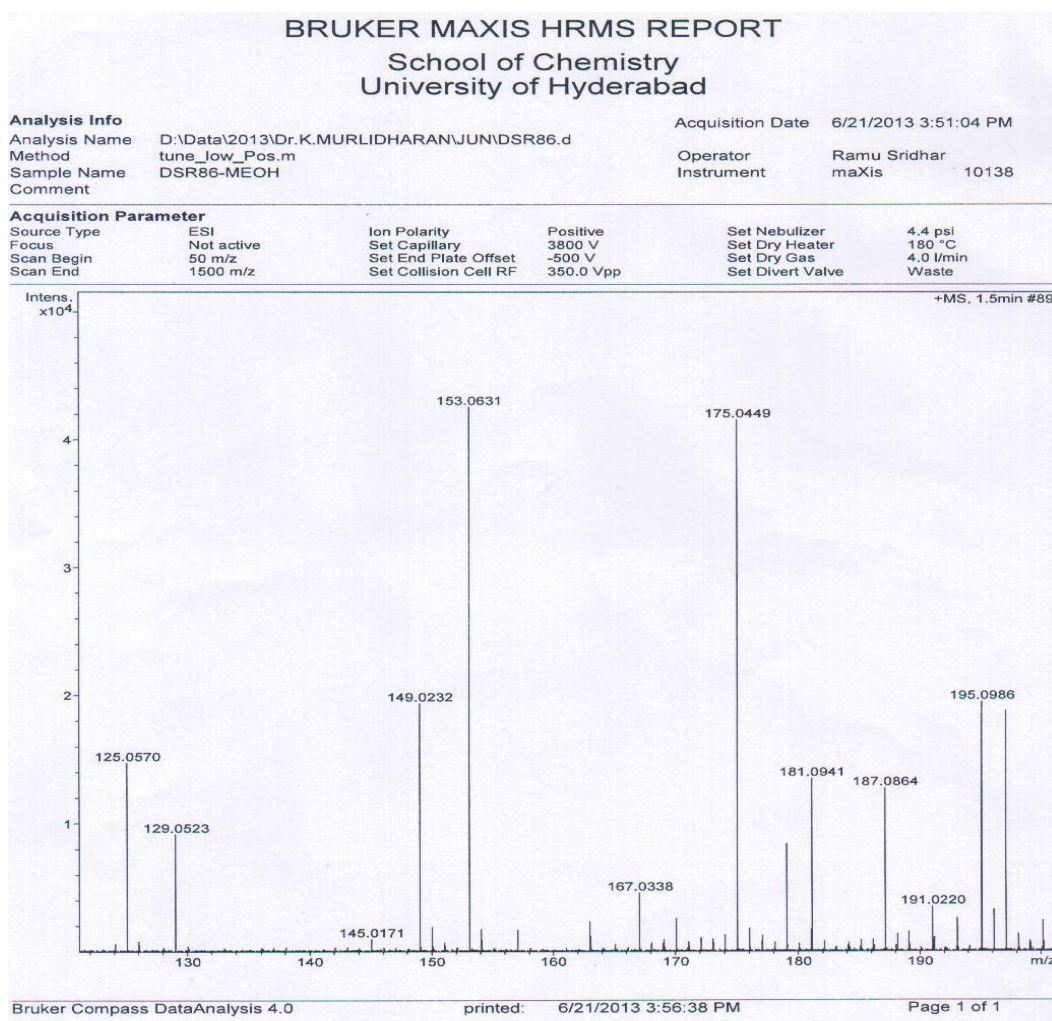

g. C H N analysis

FLASH EA 1112 SERIES CHN REPORT  
SCHOOL OF CHEMISTRY  
UNIVERSITY OF HYDERABAD

Method filename: E:\Program Files\Thermo Finnigan\Eager 300 for EA1112\DATA\Sys\_data\_ex  
Sample ID: DSR-86 (# 13)  
Analysis type: UnKnown  
Chromatogram filename: UNK-15102012-13.dat  
Sample weight: .206

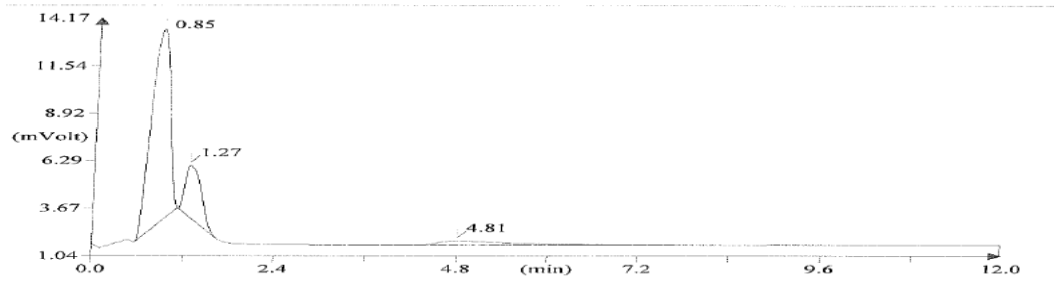

| Element Name | Element % | Ret. Time |
|--------------|-----------|-----------|
| Nitrogen     | 73.45     | 0.85      |
| Carbon       | 23.76     | 1.27      |
| Hydrogen     | 2.58      | 4.81      |

*Handwritten signature*



### 14. Diaminomethaniminium 3-amino-5-(1*H*-tetrazol-1-yl)-1,2,4-triazol-1-ide

(10a)

a.  $^1\text{H}$  NMR

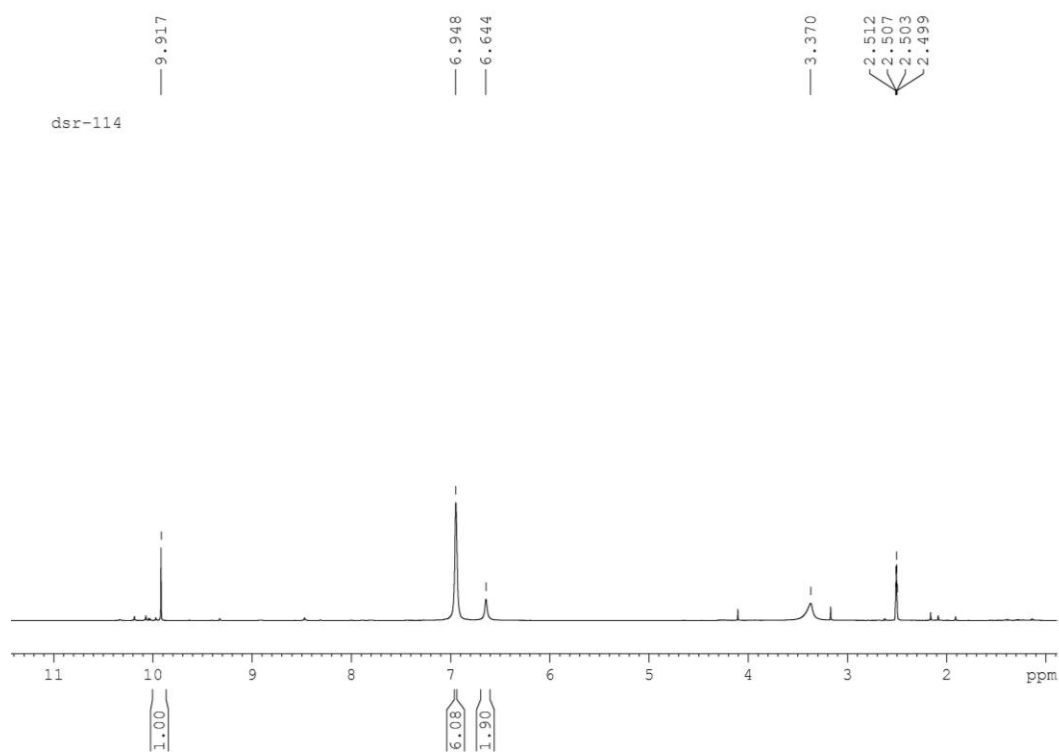

b.  $^{13}\text{C}$  NMR

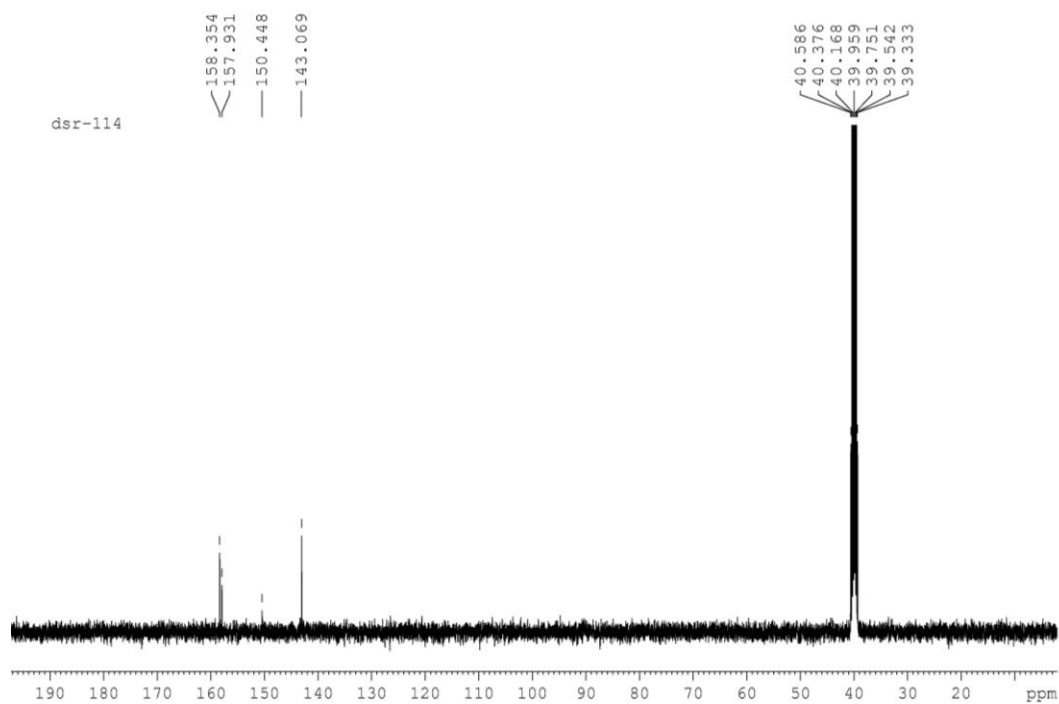

c. TG-DTA measurement

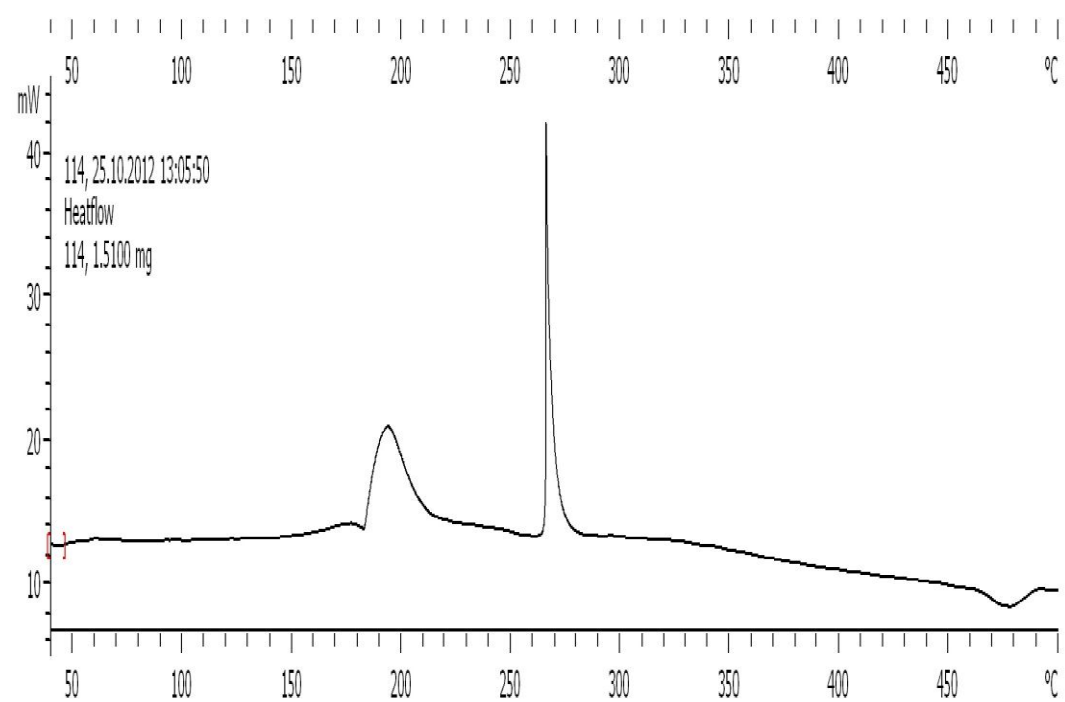

d. HRMS

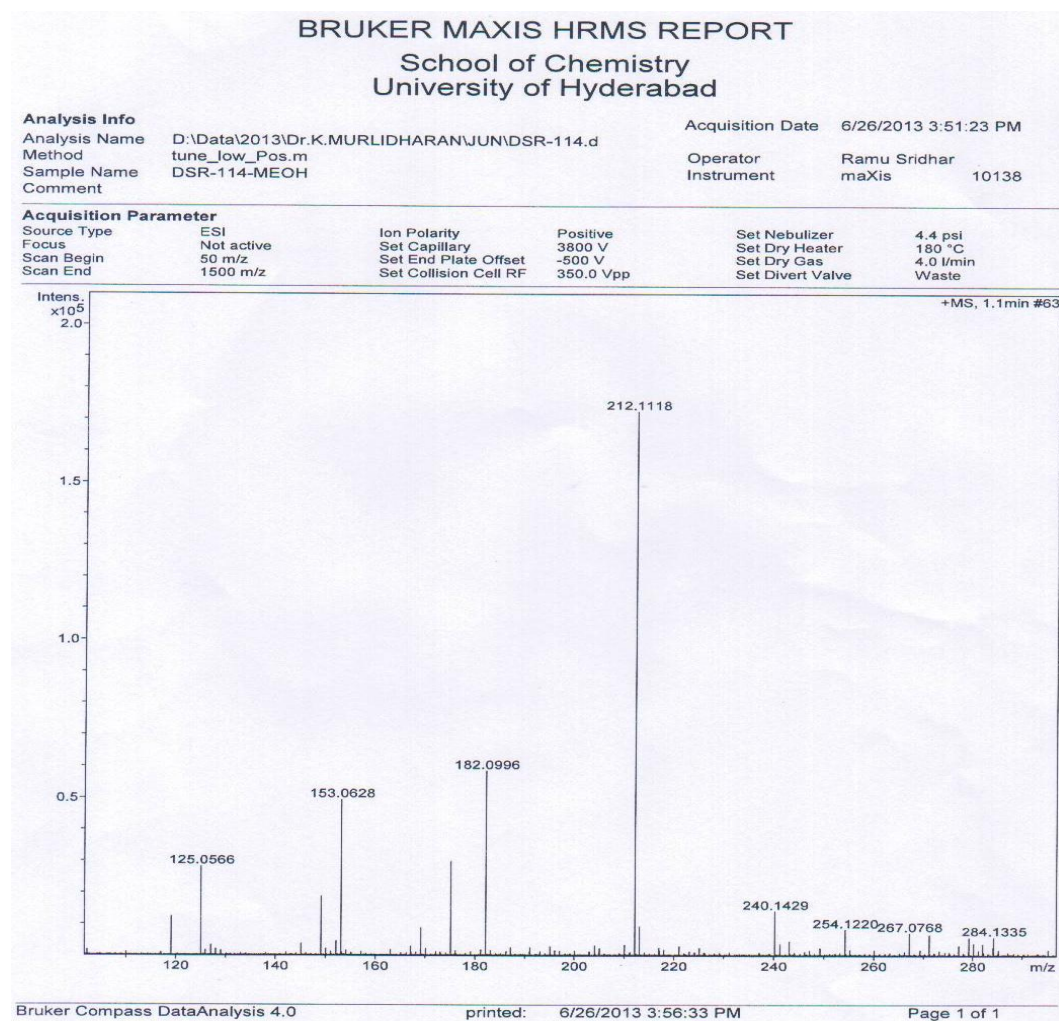

e. C H N analysis

FLASH EA 1112 SERIES CHN REPORT  
SCHOOL OF CHEMISTRY  
UNIVERSITY OF HYDERABAD

Method filename: E:\Program Files\Thermo Finnigan\Eager 300 for EA1112\DATA\Sys\_data\_e:  
Sample ID: DSR-114 (# 31)  
Analysis type: UnkNown  
Chromatogram filename: UNK-15102012-31.dat  
Sample weight: .315

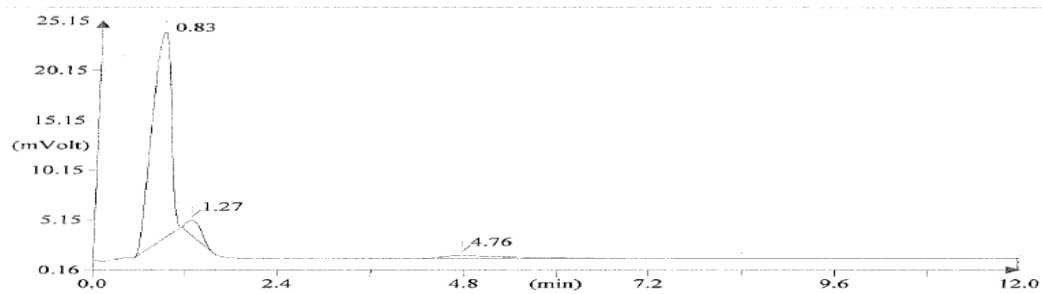

| Element Name | Element % | Ret. Time |
|--------------|-----------|-----------|
| Nitrogen     | 72.85     | 0.83      |
| Carbon       | 22.61     | 1.27      |
| Hydrogen     | 4.41      | 4.76      |

*CB*

## 15. (Hydrazinylcarbonyl)hydrazonium 3-mino-5-(1*H*-tetrazol-1-yl)-1,2,4-triazol-1-ide (10b)

### a. $^1\text{H}$ NMR

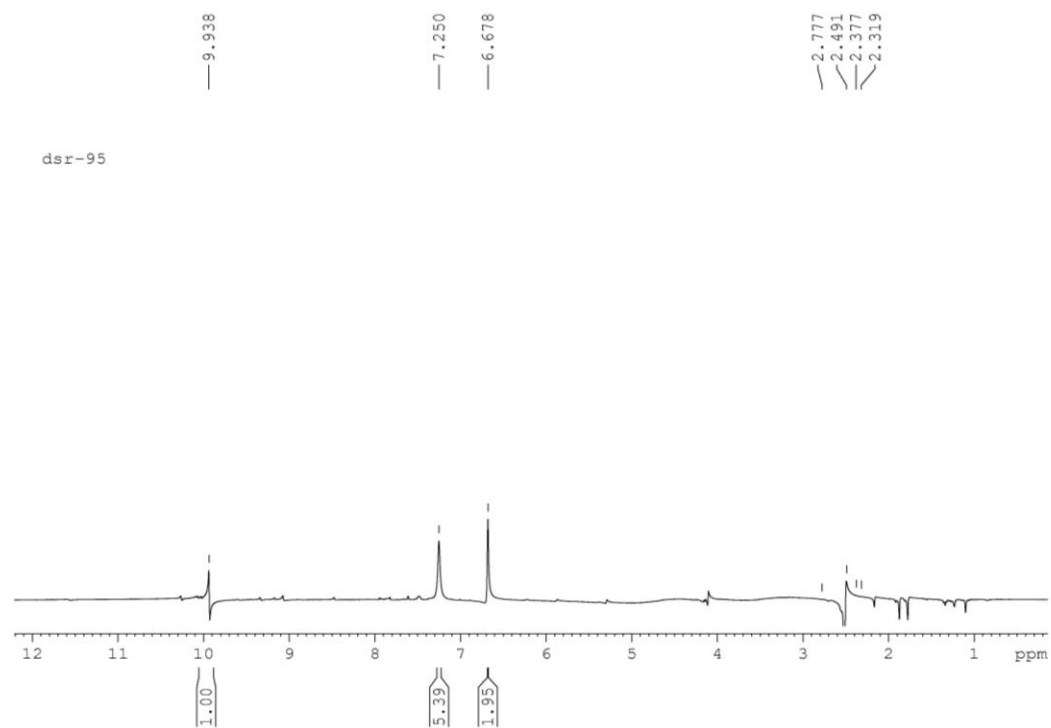

### b. $^{13}\text{C}$ NMR

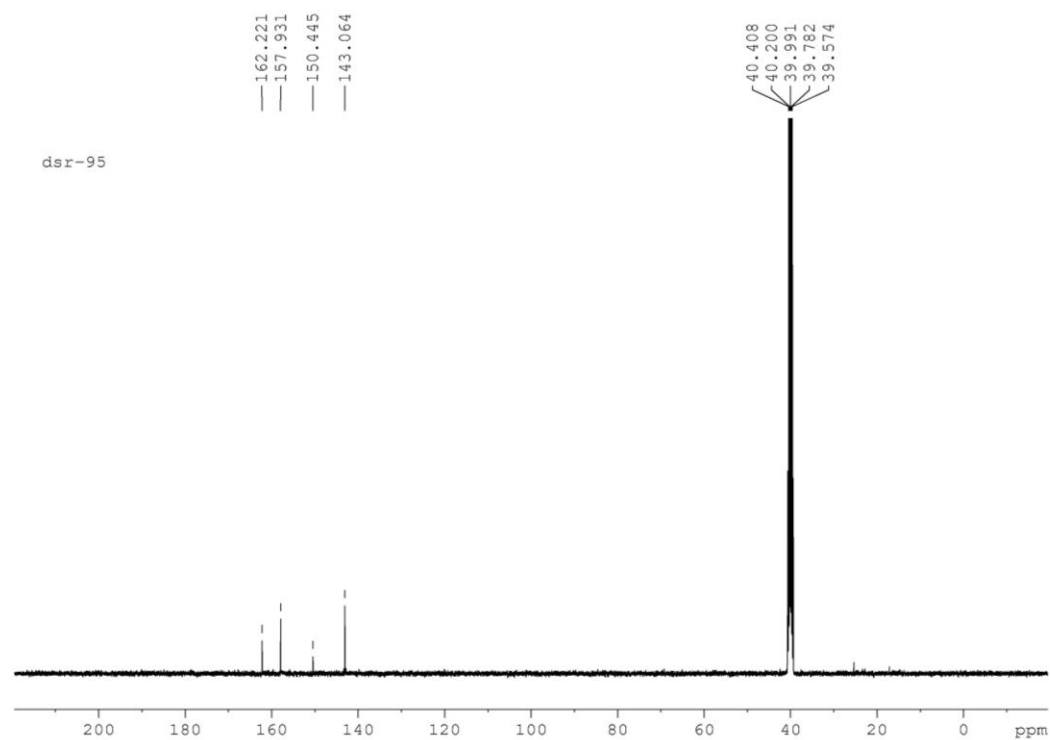

c. TG-DTA measurement

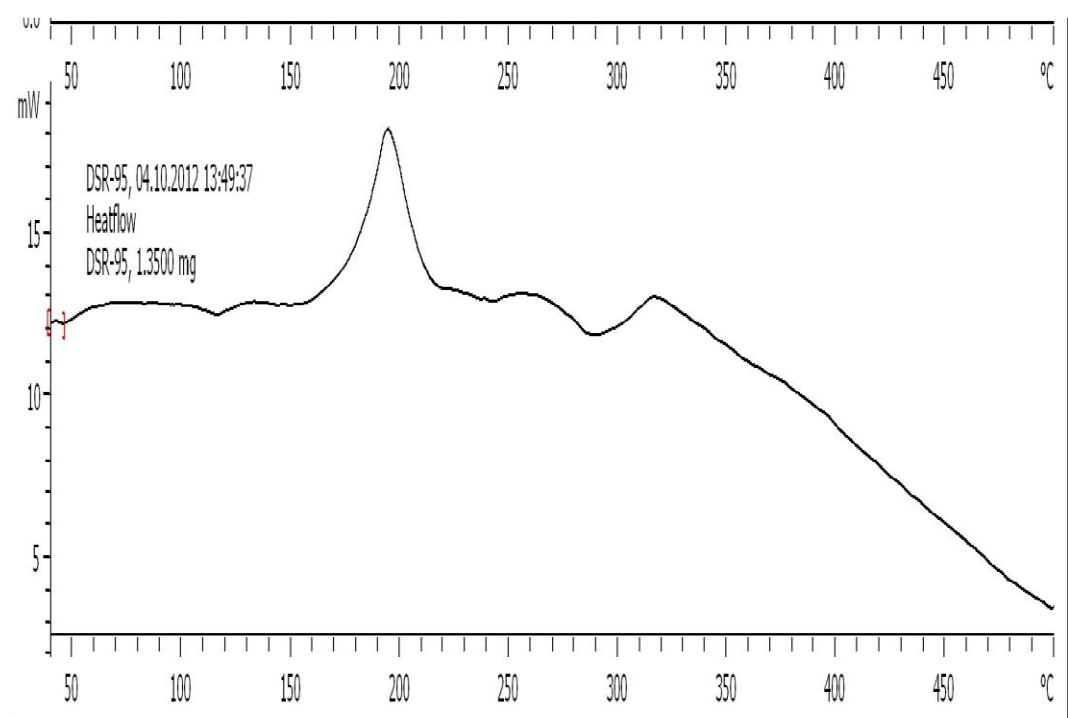

d.HRMS

BRUKER MAXIS HRMS REPORT  
School of Chemistry  
University of Hyderabad

|                      |                                             |                  |                      |
|----------------------|---------------------------------------------|------------------|----------------------|
| <b>Analysis Info</b> |                                             | Acquisition Date | 7/15/2013 1:47:02 PM |
| Analysis Name        | D:\Data\2013\Dr.K.MURLIDHARAN\JULY\DSR-95.d | Operator         | Ramu Sridhar         |
| Method               | tune_low_Pos.m                              | Instrument       | maXis 10138          |
| Sample Name          | DSR-95-MEOH                                 |                  |                      |
| Comment              |                                             |                  |                      |

|                              |            |                       |           |                  |           |
|------------------------------|------------|-----------------------|-----------|------------------|-----------|
| <b>Acquisition Parameter</b> |            |                       |           |                  |           |
| Source Type                  | ESI        | Ion Polarity          | Positive  | Set Nebulizer    | 4.4 psi   |
| Focus                        | Not active | Set Capillary         | 4200 V    | Set Dry Heater   | 180 °C    |
| Scan Begin                   | 50 m/z     | Set End Plate Offset  | -500 V    | Set Dry Gas      | 4.0 l/min |
| Scan End                     | 1500 m/z   | Set Collision Cell RF | 350.0 Vpp | Set Divert Valve | Waste     |

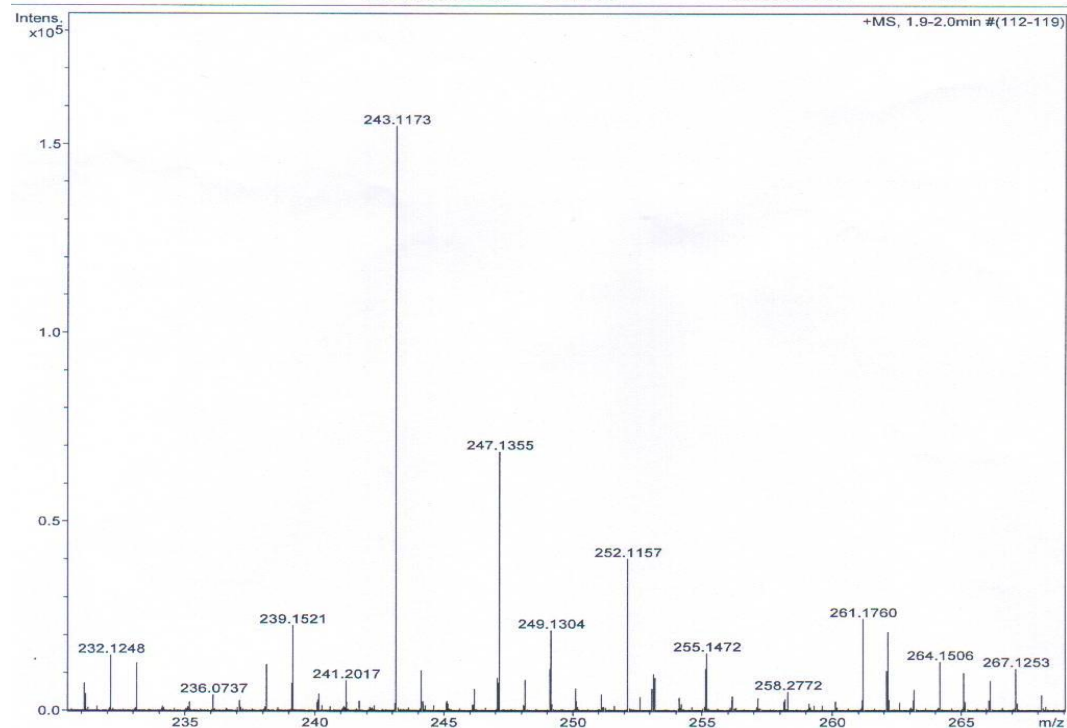

e. C H N analysis

FLASH EA 1112 SERIES CHN REPORT  
SCHOOL OF CHEMISTRY  
UNIVERSITY OF HYDERABAD

Method filename: E:\Program Files\Thermo Finnigan\Eager 300 for EA1112\DATA\Sys\_data\_ex  
Sample ID: DSR-95 (# 24)  
Analysis type: UnkNown  
Chromatogram filename: UNK-15102012-24.dat  
Sample weight: 1.365

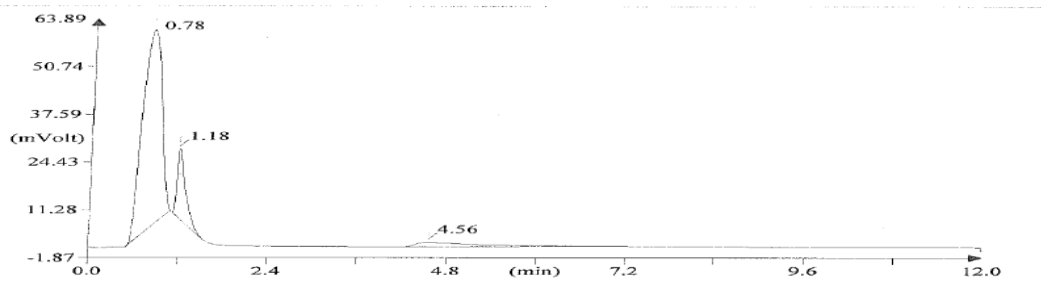

| Element Name | Element % | Ret. Time |
|--------------|-----------|-----------|
| Nitrogen     | 69.28     | 0.78      |
| Carbon       | 19.69     | 1.18      |
| Hydrogen     | 4.23      | 4.56      |

*CSK*



## 16. 3-Amino-1*H*-1,2,4-triazol-4-ium 3-amino-5-(1*H*-tetrazol-1-yl)-1,2,4-triazol-1-ide (10d)

### a. <sup>1</sup>H NMR

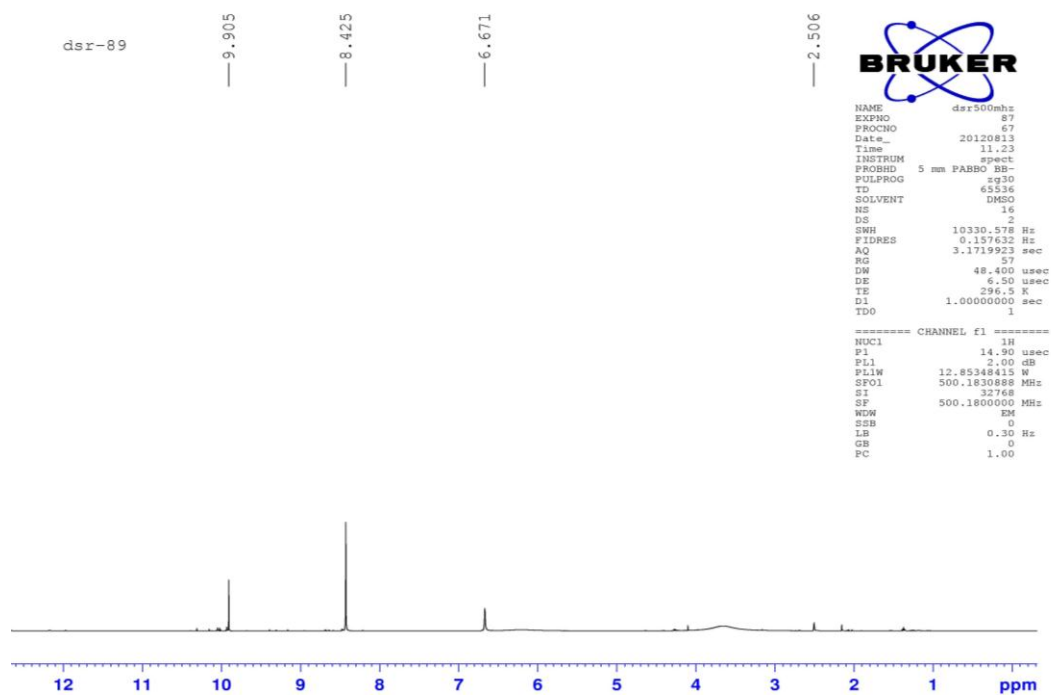

### b. <sup>13</sup>C NMR

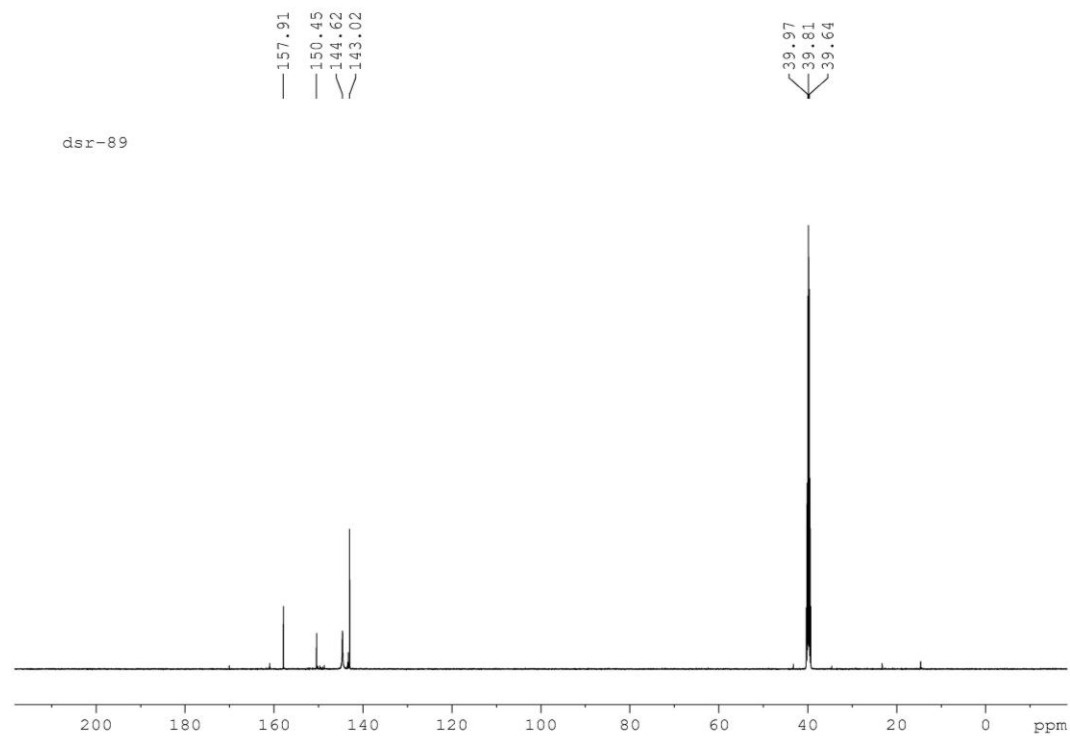

### c. DEPT

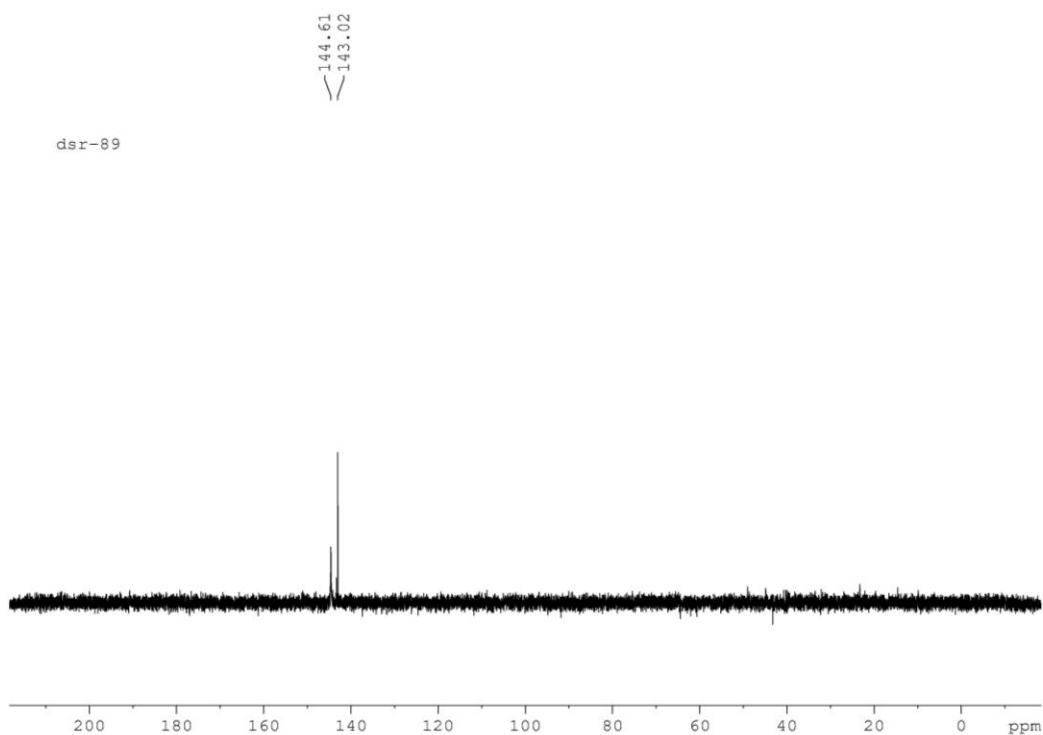

### d. TG-DTA measurement

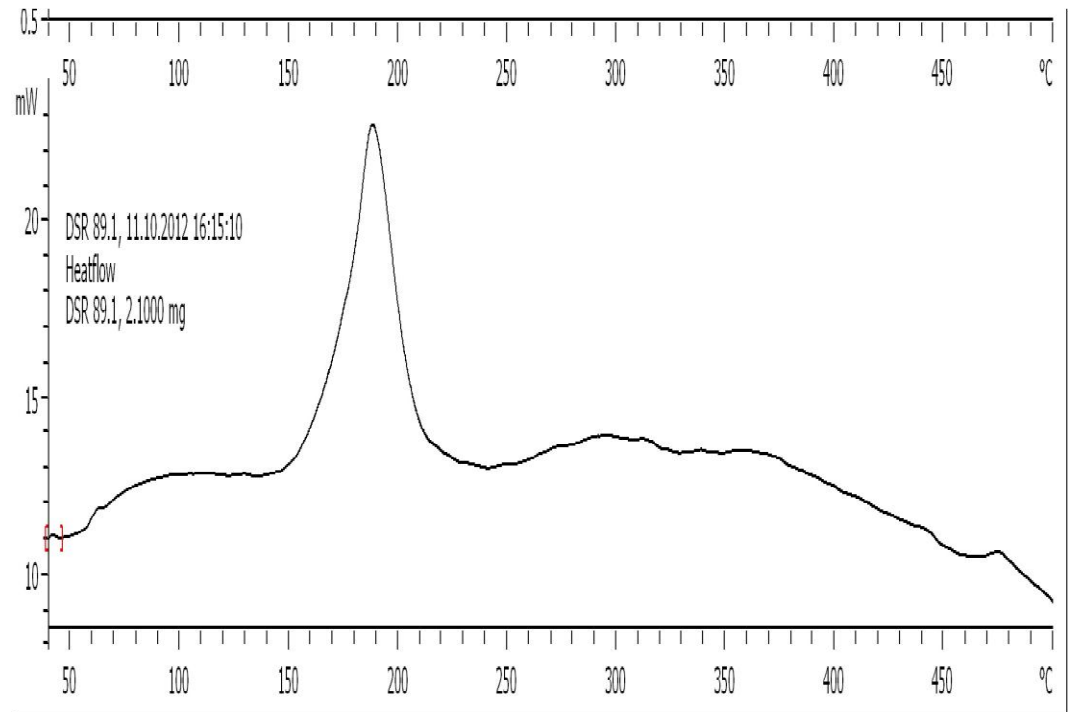

e. C H N analysis

FLASH EA 1112 SERIES CHN REPORT  
SCHOOL OF CHEMISTRY  
UNIVERSITY OF HYDERABAD

Method filename: E:\Program Files\Thermo Finnigan\Eager 300 for EA1112\DATA\Sys\_data\_ex  
Sample ID: DSR-89 (# 16)  
Analysis type: Unknown  
Chromatogram filename: UNK-15102012-16.dat  
Sample weight: .315

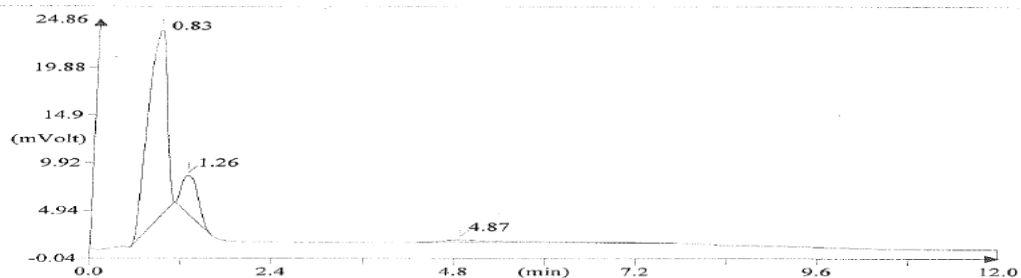

| Element Name | Element % | Ret. Time |
|--------------|-----------|-----------|
| Nitrogen     | 70.69     | 0.83      |
| Carbon       | 25.15     | 1.26      |
| Hydrogen     | 3.76      | 4.87      |

*OSL*

**17. 3,5-Diamino-1*H*-1,2,4-triazol-4-ium 3-amino-5-(1*H*-tetrazol-1-yl)-1,2,4-triazol-1-ide (10e)**

a. <sup>1</sup>H NMR

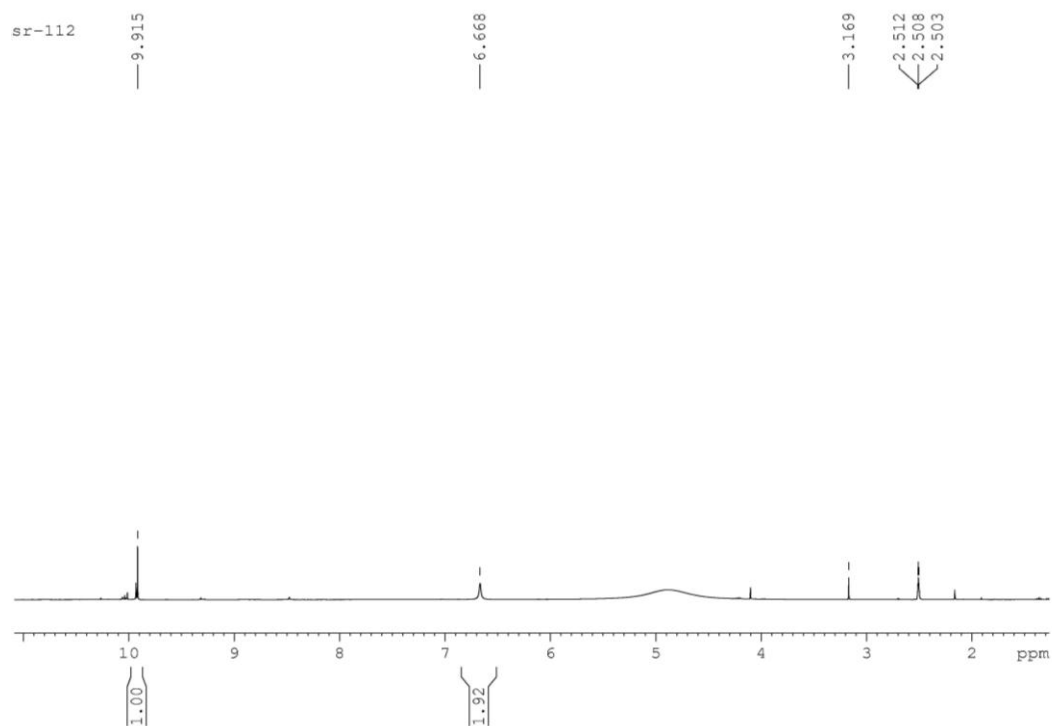

b. <sup>13</sup>C NMR

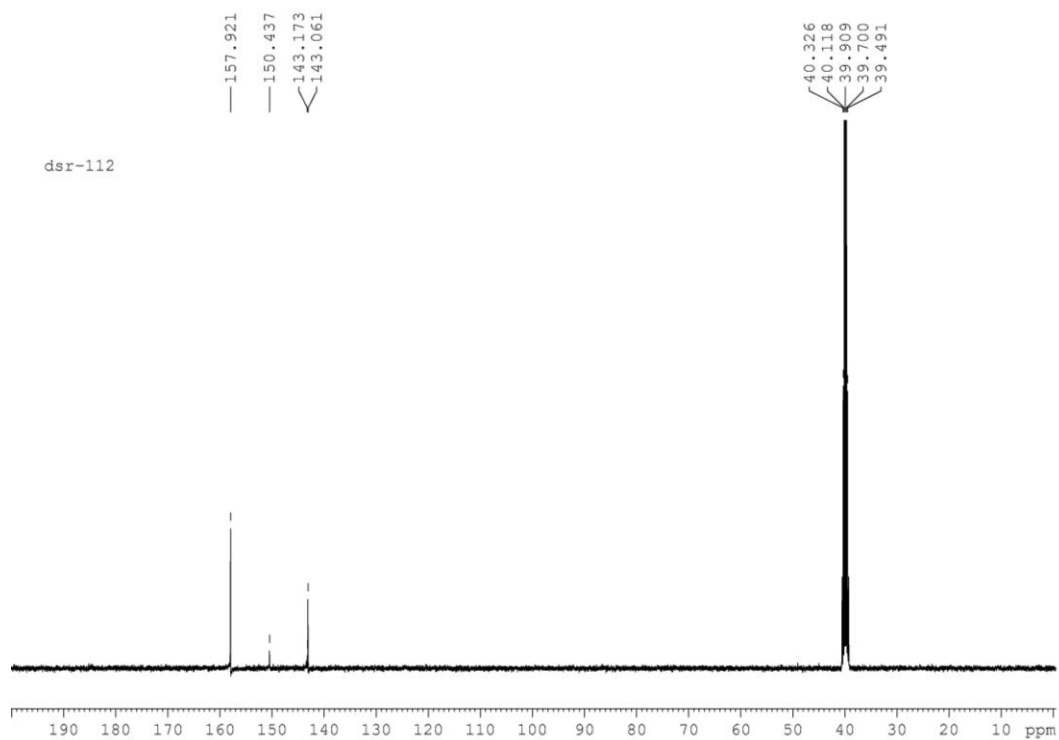

c. DEPT

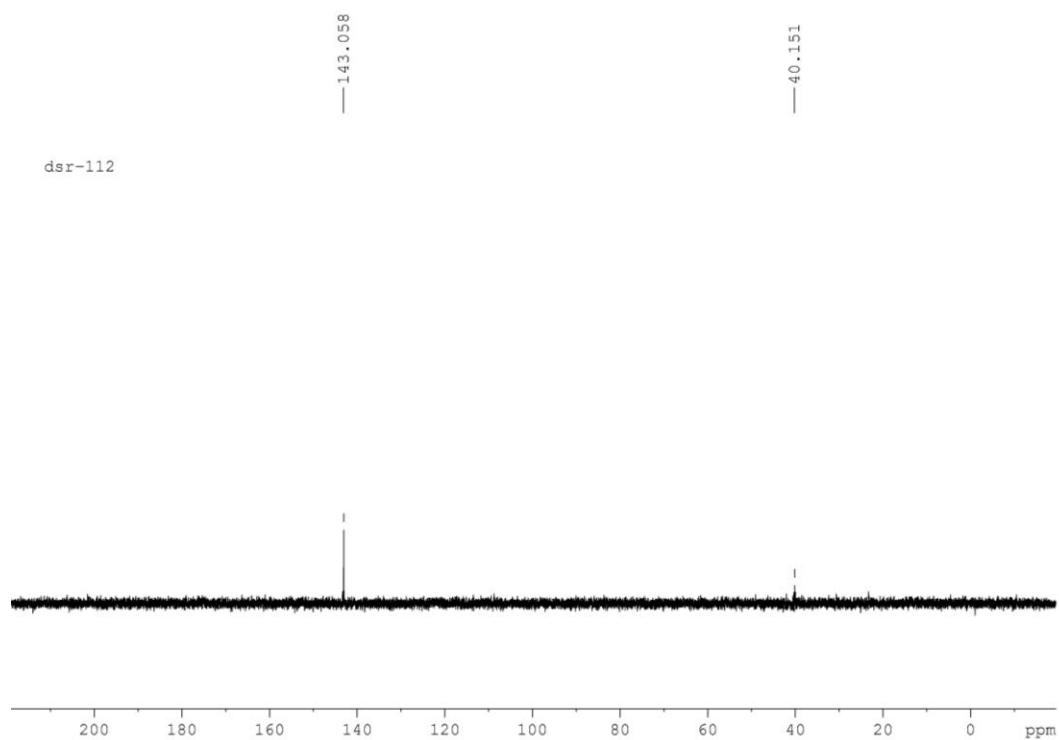

d. TG-DTA measurement

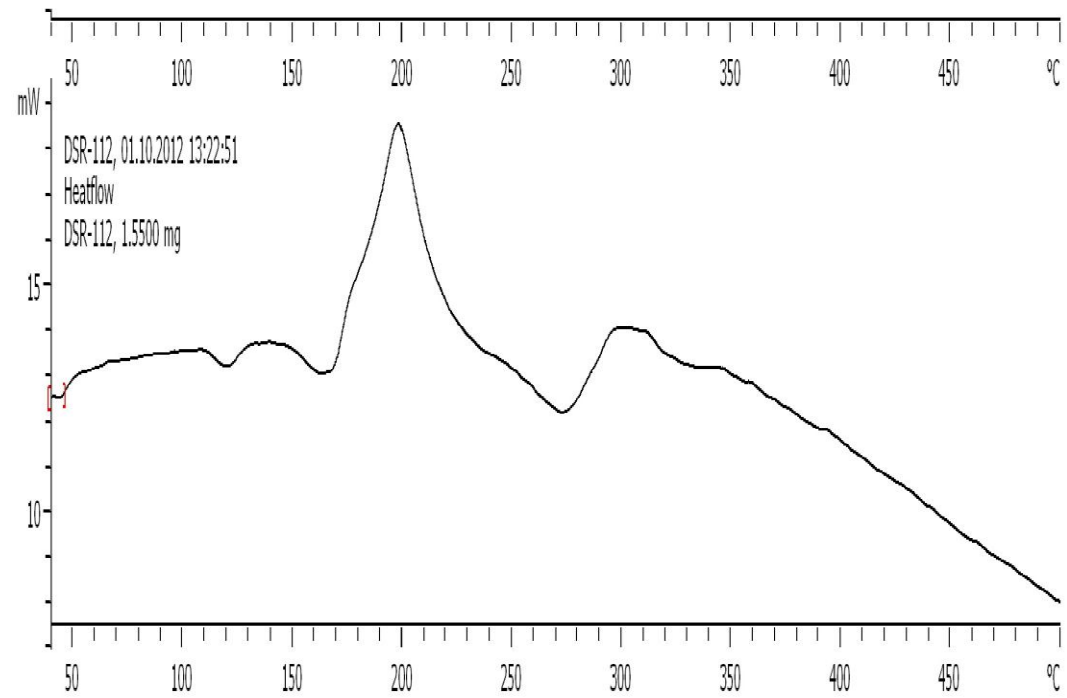

e.HRMS

BRUKER MAXIS HRMS REPORT  
School of Chemistry  
University of Hyderabad

Analysis Info

Analysis Name D:\Data\2013\Dr.K.MURLIDHARAN\JULY\DSR-112.d  
Method tune\_low\_Pos.m  
Sample Name DSR-112-MEOH  
Comment

Acquisition Date 7/15/2013 1:56:43 PM

Operator Ramu Sridhar  
Instrument maXis 10138

Acquisition Parameter

|             |            |                       |           |                  |           |
|-------------|------------|-----------------------|-----------|------------------|-----------|
| Source Type | ESI        | Ion Polarity          | Positive  | Set Nebulizer    | 4.4 psi   |
| Focus       | Not active | Set Capillary         | 4200 V    | Set Dry Heater   | 180 °C    |
| Scan Begin  | 50 m/z     | Set End Plate Offset  | -500 V    | Set Dry Gas      | 4.0 l/min |
| Scan End    | 1500 m/z   | Set Collision Cell RF | 350.0 Vpp | Set Divert Valve | Waste     |

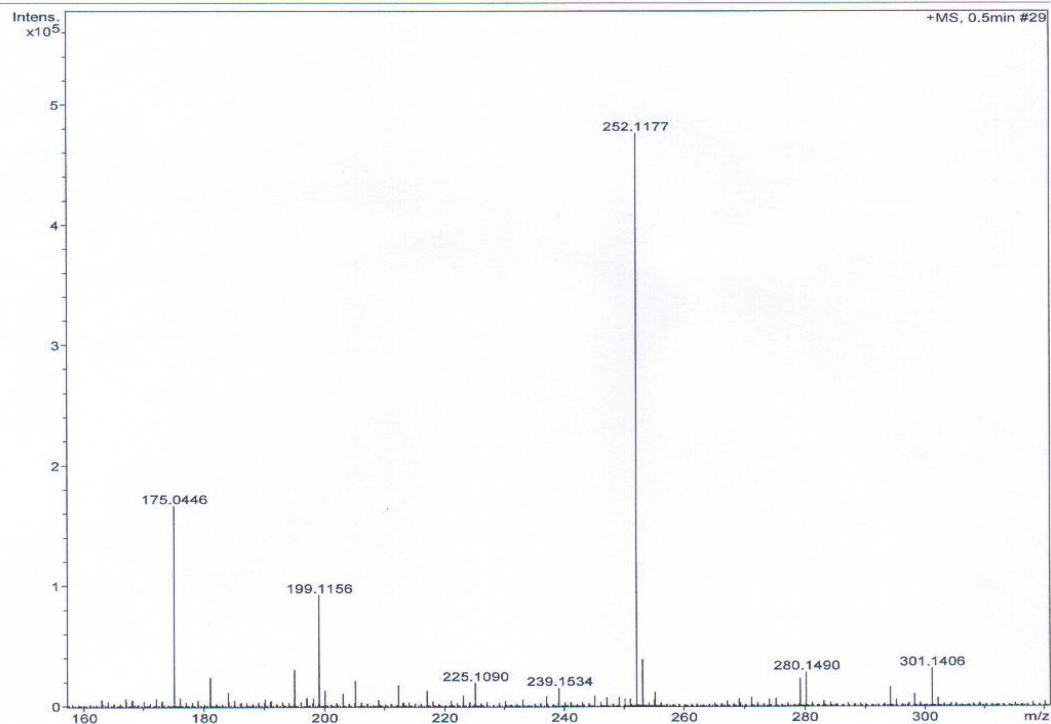

f. C H N analysis

FLASH EA 1112 SERIES CHN REPORT  
SCHOOL OF CHEMISTRY  
UNIVERSITY OF HYDERABAD

Method filename: E:\Program Files\Thermo Finnigan\Eager 300 for EA1112\DATA\Sys\_data\_ex  
Sample ID: DSR-112 (# 36)  
Analysis type: UnkNown  
Chromatogram filename: UNK-15102012-36.dat  
Sample weight: .296

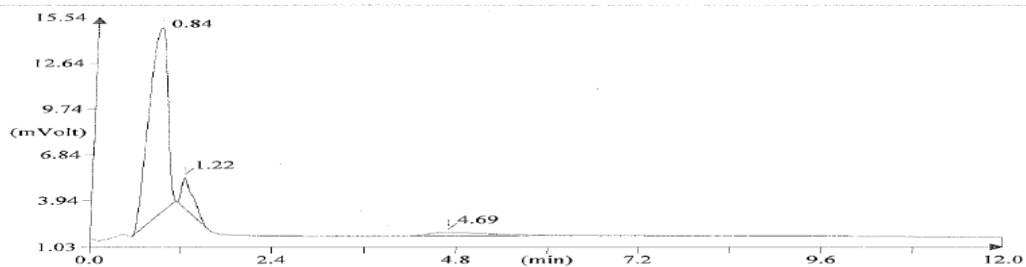

| Element Name | Element % | Ret. Time |
|--------------|-----------|-----------|
| Nitrogen     | 72.65     | 0.84      |
| Carbon       | 24.12     | 1.22      |
| Hydrogen     | 3.21      | 4.69      |

*[Handwritten signature]*

## 18. 1-(3-Azido-1*H*-1,2,4-triazol-5-yl)-1*H*-tetrazole (11)

### a. $^1\text{H}$ NMR

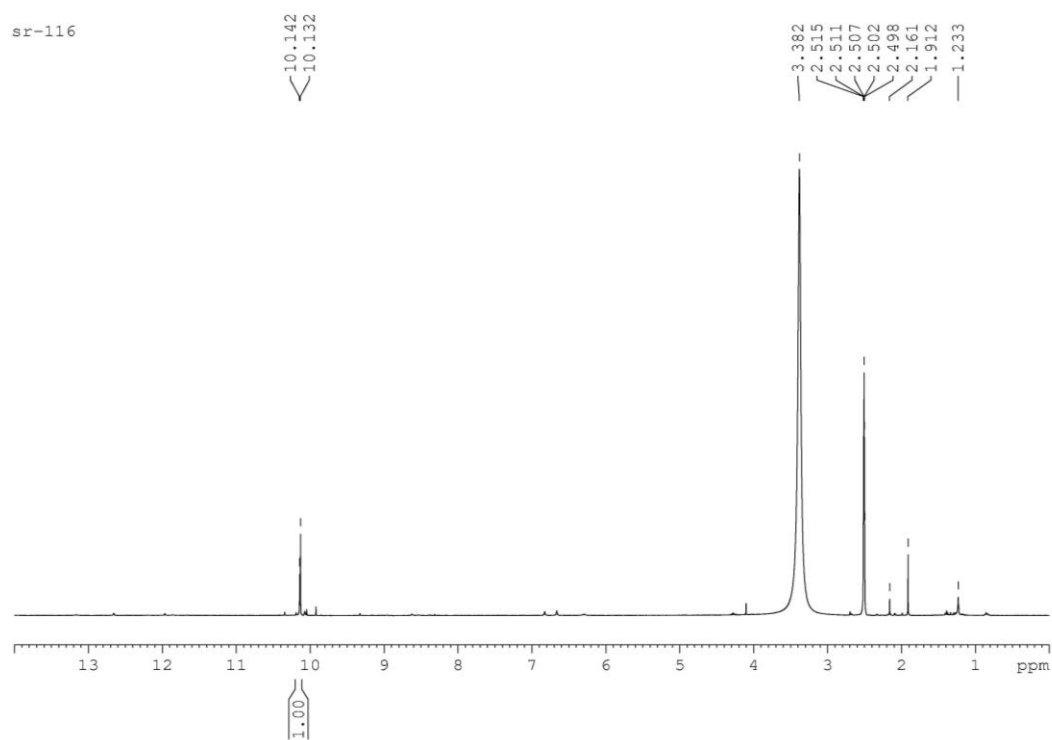

### b. $^{13}\text{C}$ NMR

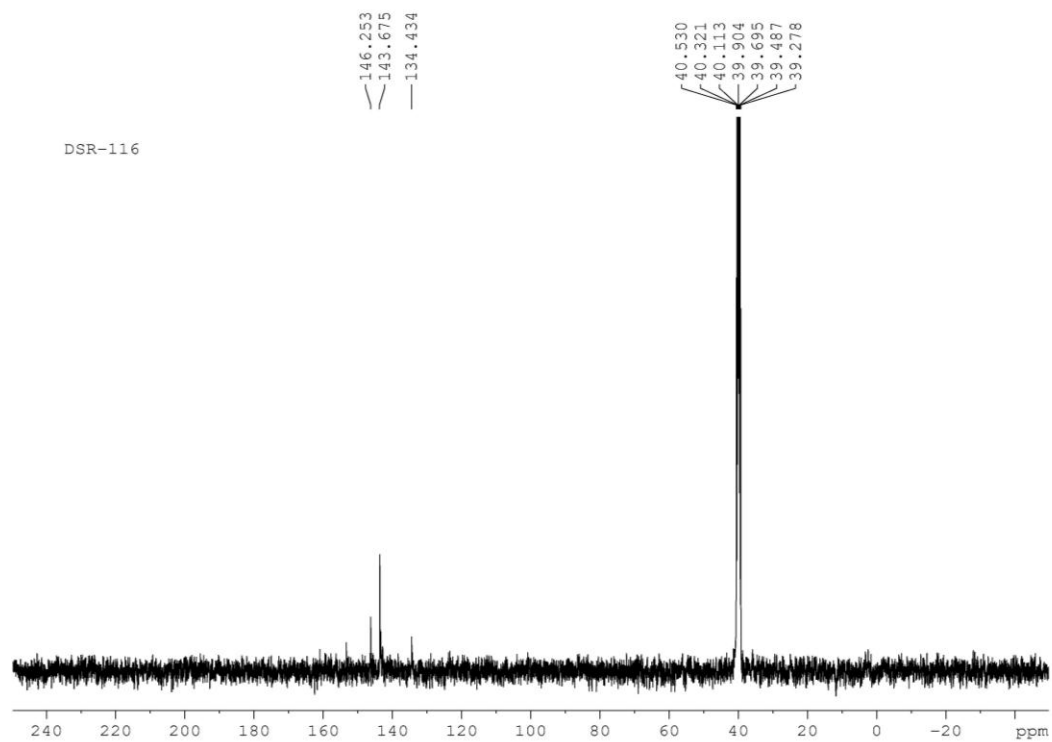



### c. TG-DTA measurement

Sample: dsr-116  
Size: 1.1750 mg  
Method: Ramp

DSC-TGA

File: C:\TA\Data\SDT\srinivasanna\dsr-116.001  
Operator: gsreddy  
Run Date: 08-Jan-13 14:18  
Instrument: SDT Q600 V20.9 Build 20

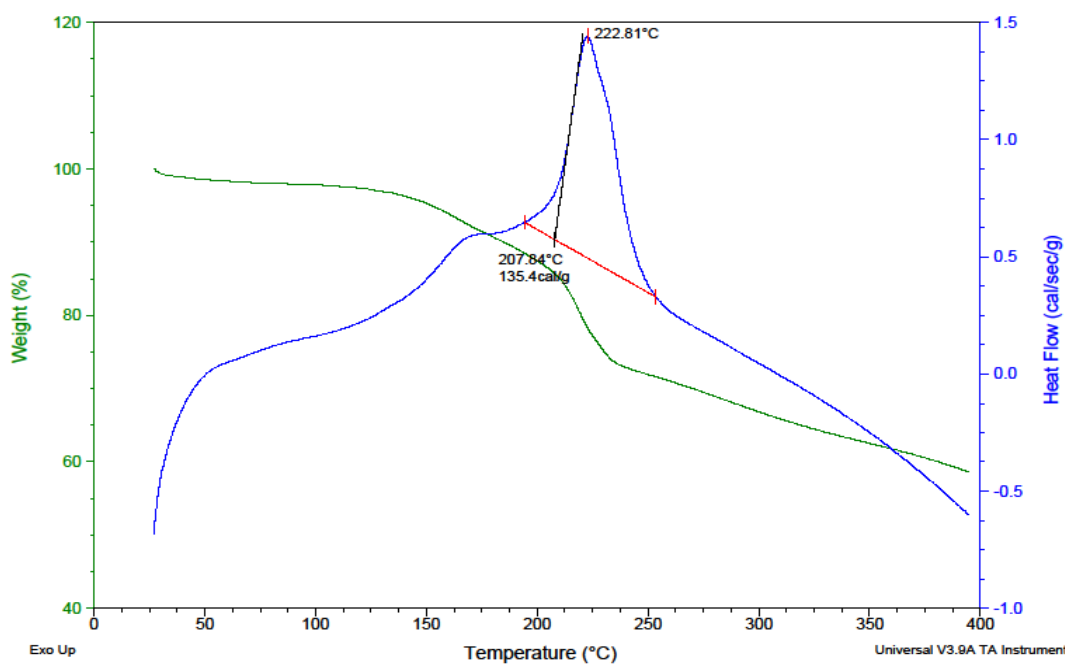

d. HRMS

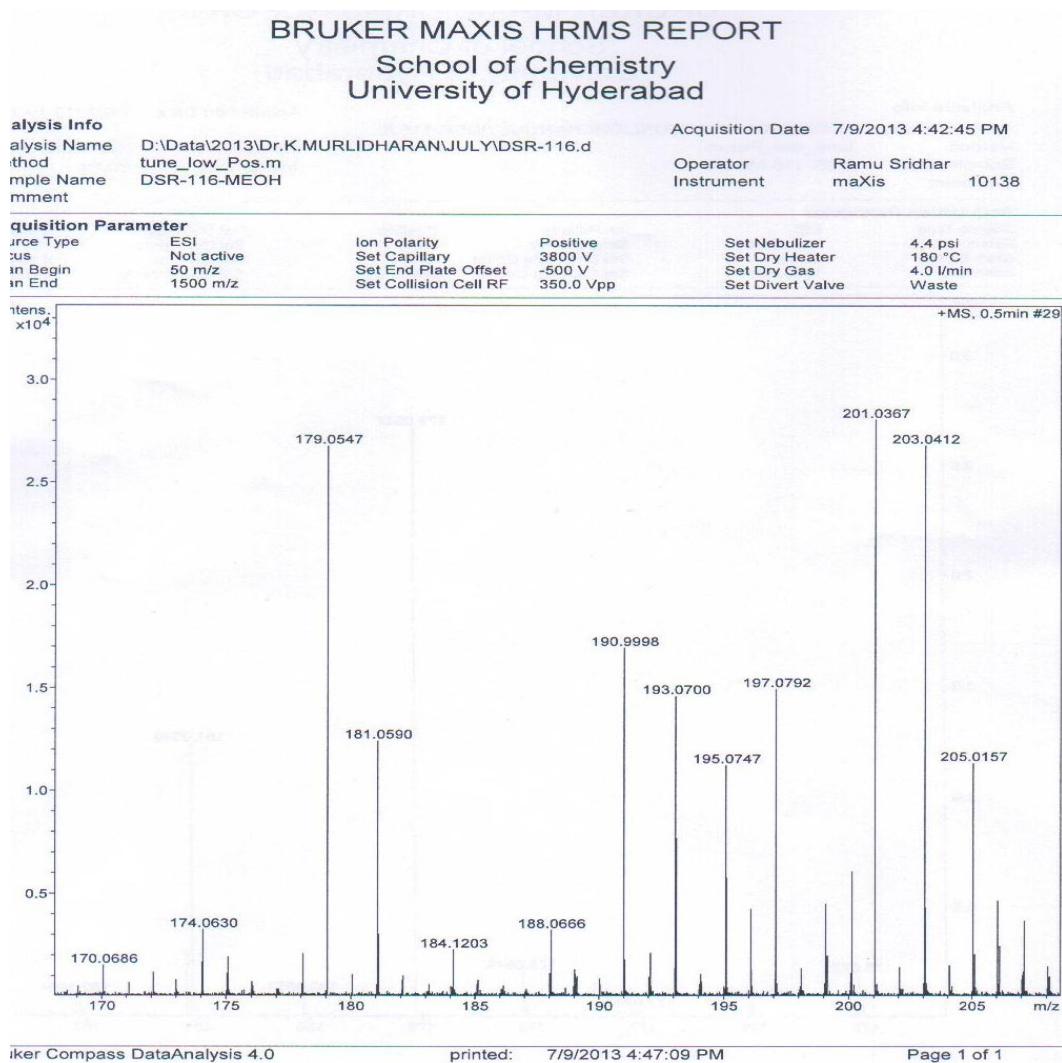

e. C H N analysis

FLASH EA 1112 SERIES CHN REPORT  
SCHOOL OF CHEMISTRY  
UNIVERSITY OF HYDERABAD

Method filename: E:\Program Files\Thermo Finnigan\Eager 300 for EA1112\DATA\Sys\_data\_ex  
Sample ID: DSR-116 (# 100)  
Analysis type: UnkNown  
Chromatogram filename: UNK-20022013-20.dat  
Sample weight: 1.683

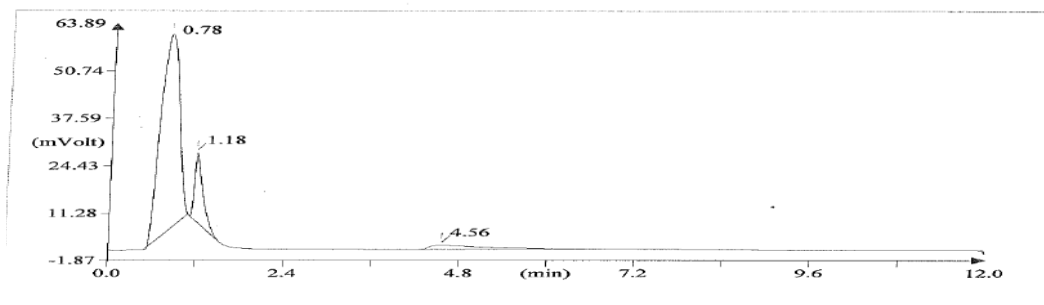

| Element Name | Element % | Ret. Time |
|--------------|-----------|-----------|
| Nitrogen     | 78.54     | 0.78      |
| Carbon       | 20.32     | 1.18      |
| Hydrogen     | 1.18      | 4.56      |

*DSR*

### 19. 3,5-Diamino-1*H*-1,2,4-triazol-4-ium 3-azido-5-(1*H*-tetrazol-1-yl)-1,2,4-triazol-1-ide (11e)

#### a. <sup>1</sup>H NMR

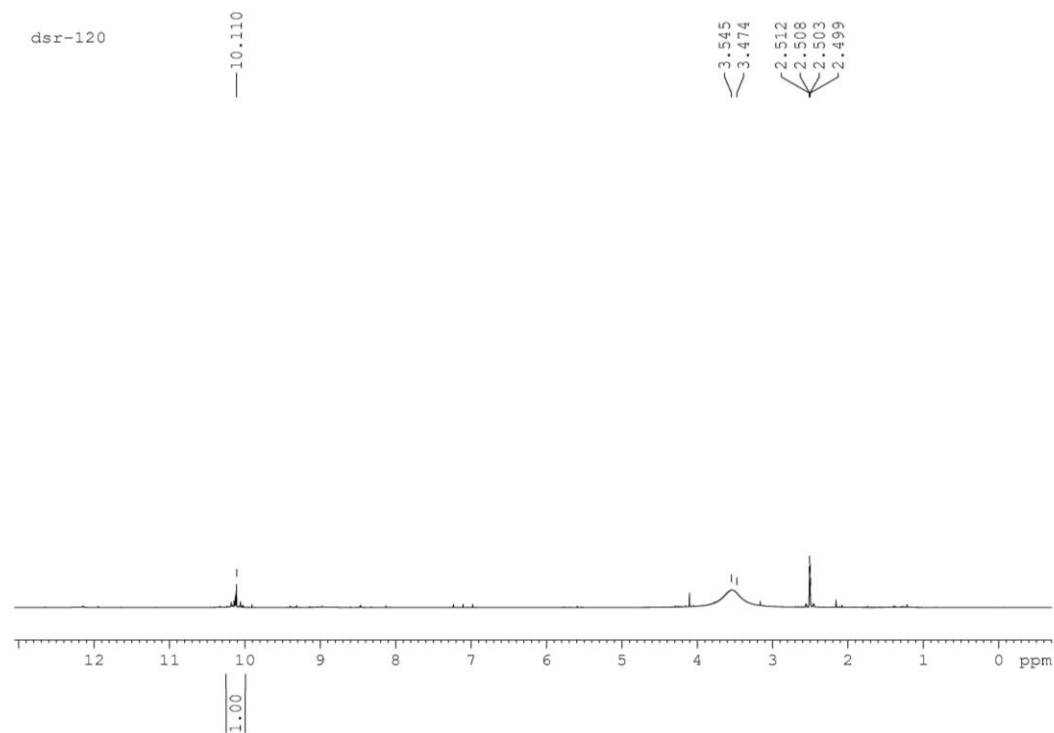

#### b. <sup>13</sup>C NMR

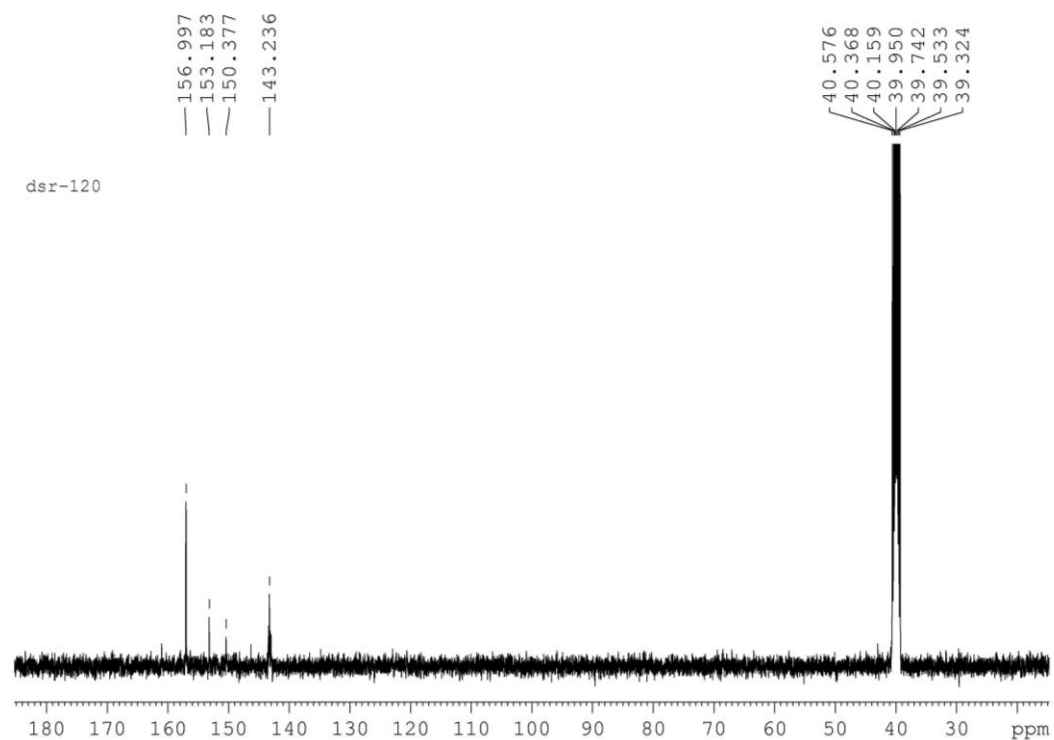

c. DEPT

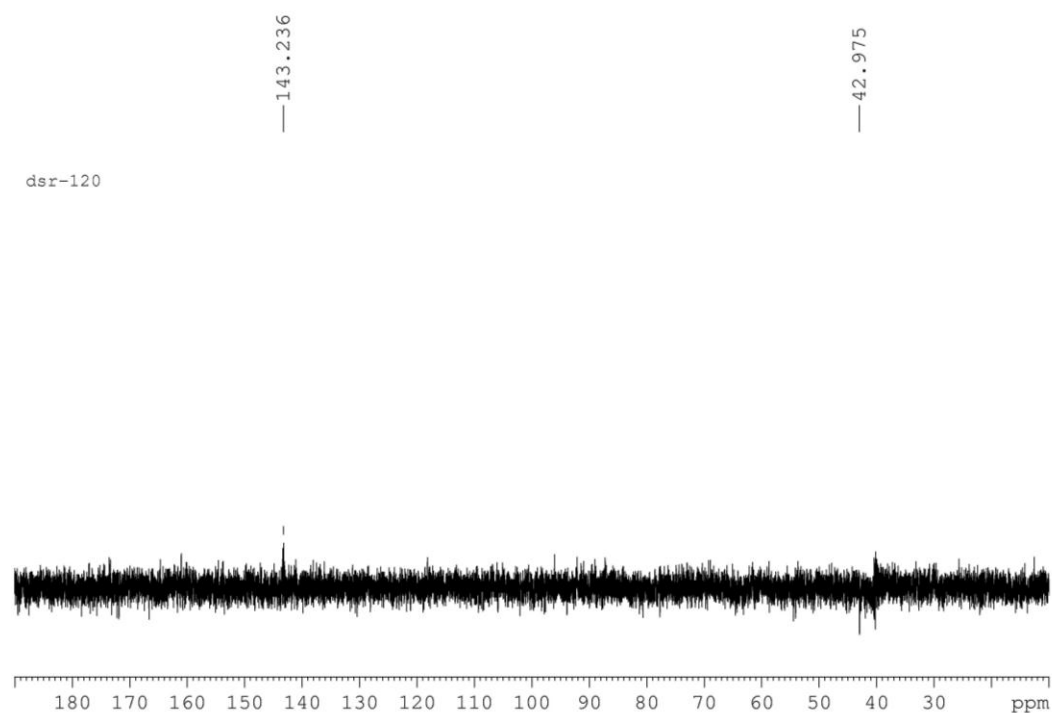

d. TG-DTA measurement

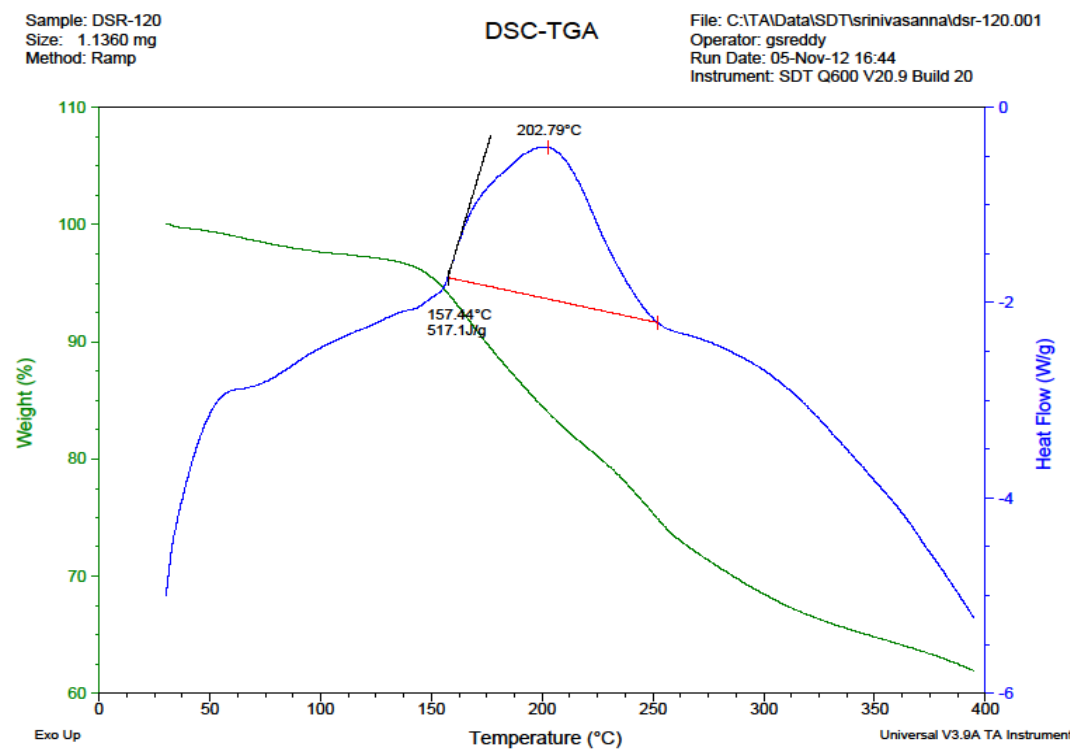

e. C H N analysis

FLASH EA 1112 SERIES CHN REPORT  
SCHOOL OF CHEMISTRY  
UNIVERSITY OF HYDERABAD

Method filename: E:\Program Files\Thermo Finnigan\Eager 300 for EA1112\DATA\Sys\_data\_ex  
Sample ID: DSR-120 (# 94)  
Analysis type: UnkNown  
Chromatogram filename: UNK-20022013-14.dat  
Sample weight: .981

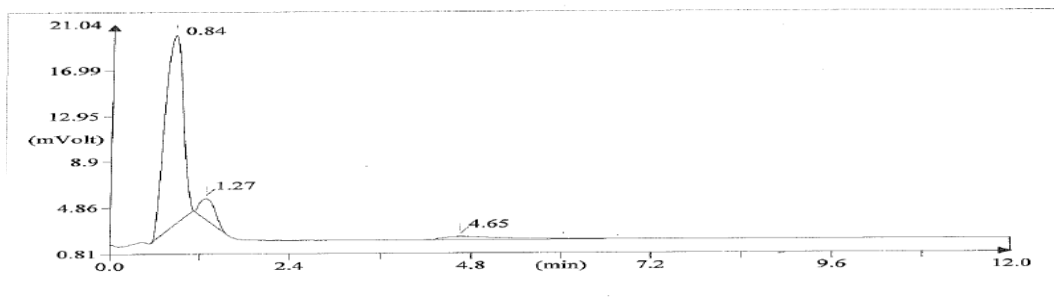

| Element Name | Element % | Ret. Time |
|--------------|-----------|-----------|
| Nitrogen     | 75.63     | 0.84      |
| Carbon       | 21.52     | 1.27      |
| Hydrogen     | 2.58      | 4.65      |

*CSL*

## 20. 3-Azido-1*H*-1,2,4-triazol-5-amine (12)

### a. <sup>1</sup>H NMR

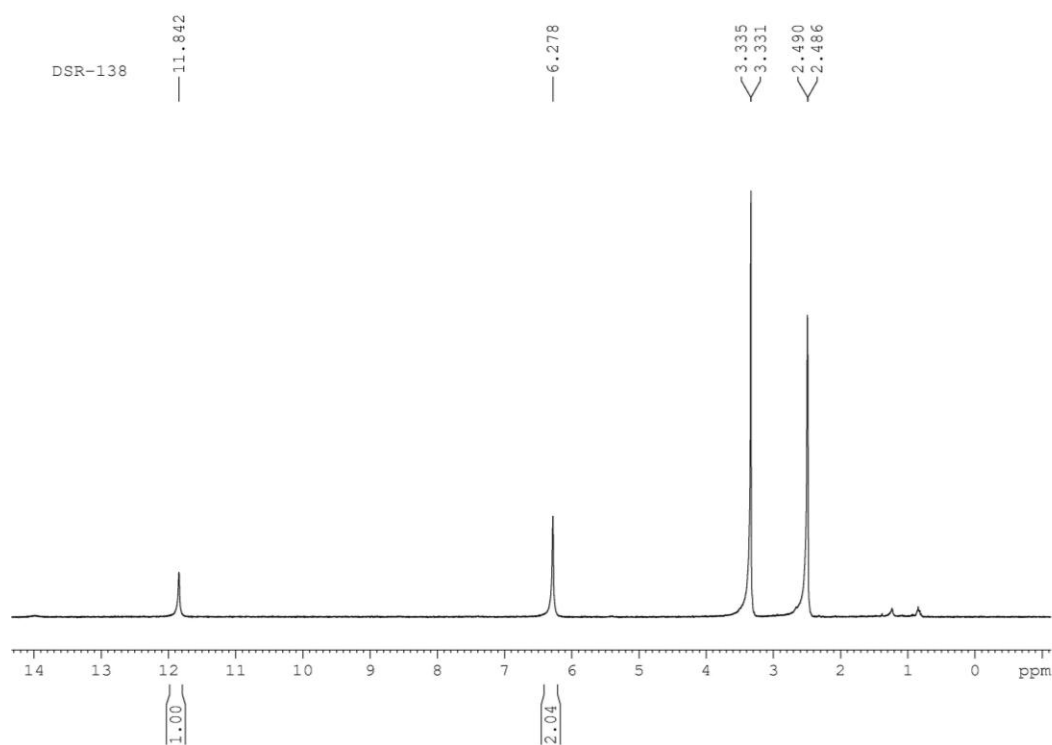

### b. <sup>13</sup>C NMR

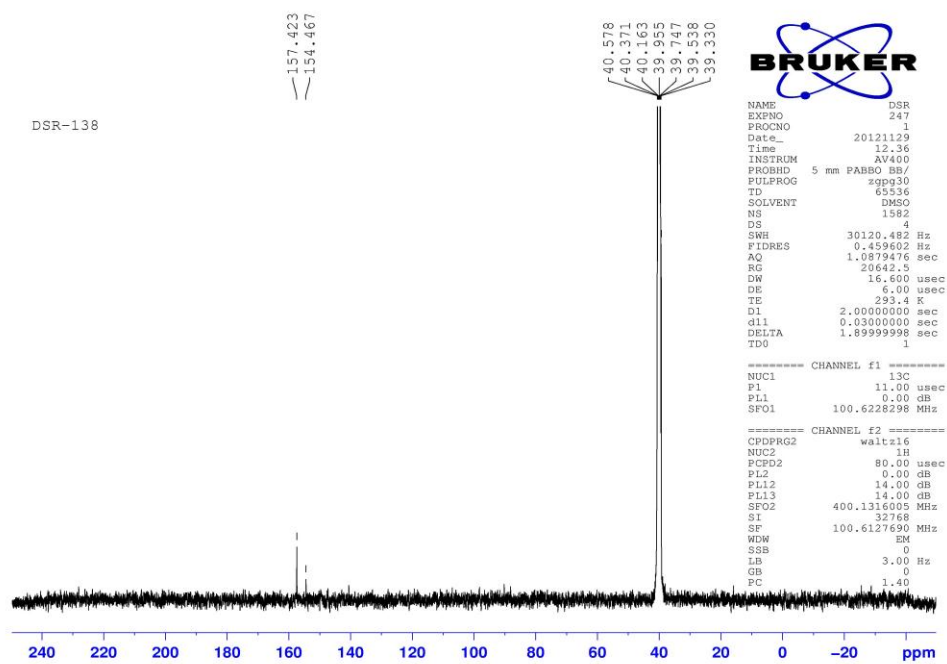

c . TG-DTA measurement

Sample: DSR-138  
Size: 1.0360 mg  
Method: Ramp

DSC-TGA

File: C:\TA\Data\SDT\srinivasanna\DSR-138.001  
Operator: gsreddy  
Run Date: 05-Dec-12 10:29  
Instrument: SDT Q600 V20.9 Build 20

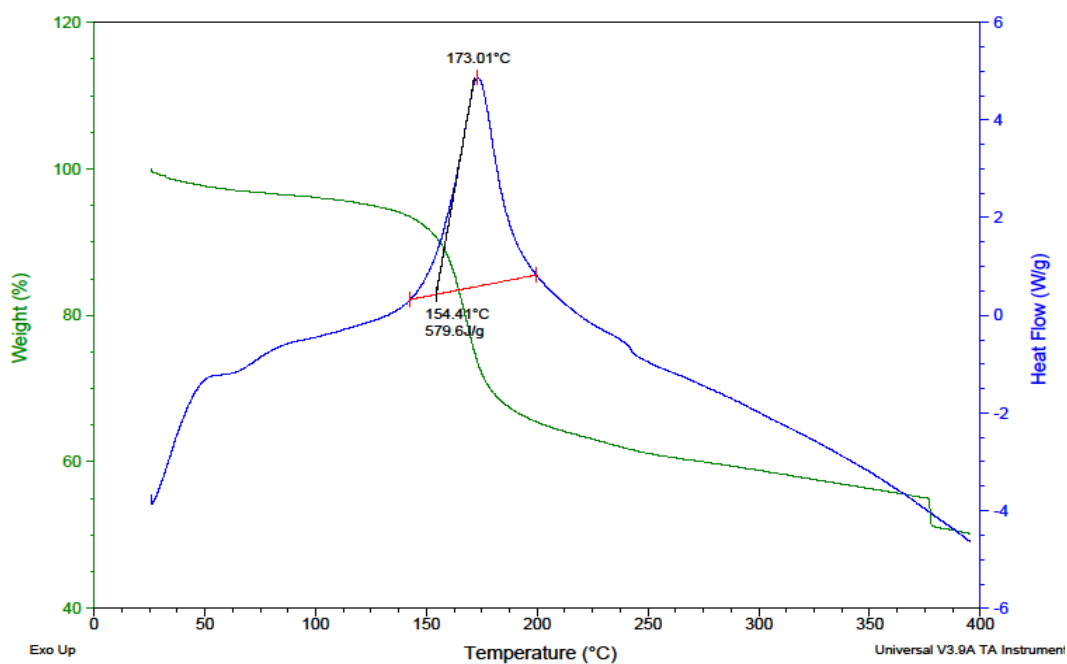



d.HRMS

BRUKER MAXIS HRMS REPORT

School of Chemistry  
University of Hyderabad

Analysis Info

Analysis Name D:\Data\2013\Dr.K.MURLIDHARAN\JULY\DSR-138.d  
Method tune\_low\_Pos.m  
Sample Name DSR-138-MEOH  
Comment

Acquisition Date 7/31/2013 2:19:30 PM

Operator Ramu Sridhar  
Instrument maXis 10138

Acquisition Parameter

|             |            |                       |           |                  |           |
|-------------|------------|-----------------------|-----------|------------------|-----------|
| Source Type | ESI        | Ion Polarity          | Positive  | Set Nebulizer    | 4.4 psi   |
| Focus       | Not active | Set Capillary         | 3800 V    | Set Dry Heater   | 180 °C    |
| Scan Begin  | 50 m/z     | Set End Plate Offset  | -500 V    | Set Dry Gas      | 4.0 l/min |
| Scan End    | 1500 m/z   | Set Collision Cell RF | 350.0 Vpp | Set Divert Valve | Waste     |

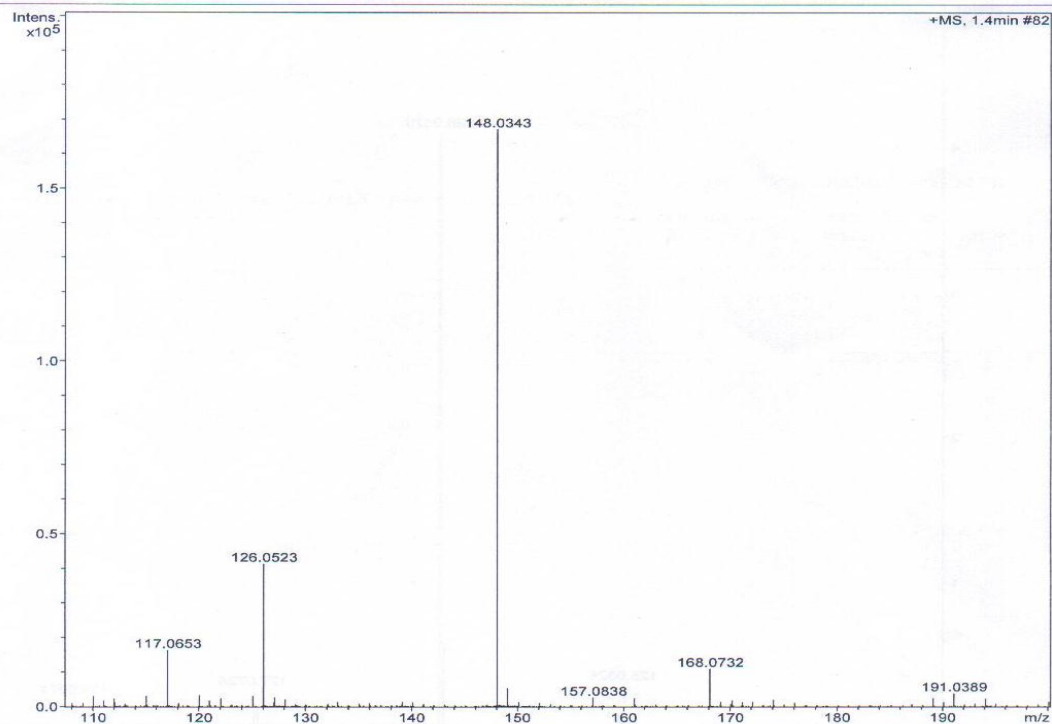

e. C H N analysis

FLASH EA 1112 SERIES CHN REPORT  
SCHOOL OF CHEMISTRY  
UNIVERSITY OF HYDERABAD

Method filename: E:\Program Files\Thermo Finnigan\Eager 300 for EA1112\DATA\Sys\_data\_e  
Sample ID: DSR-138 (# 45)  
Analysis type: UnkNown  
Chromatogram filename: UNK-06022013-15.dat  
Sample weight: .792

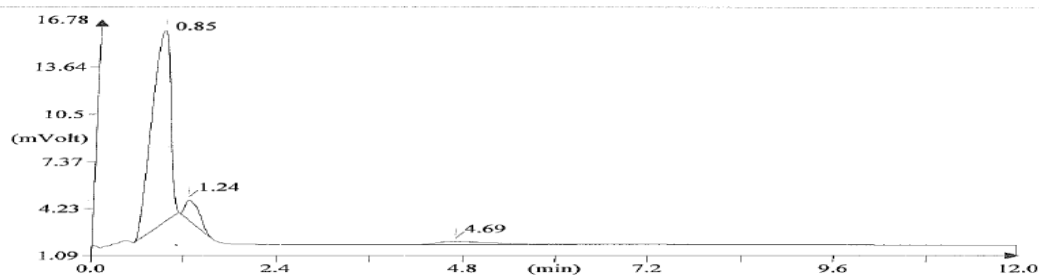

| Element Name | Element % | Ret. Time |
|--------------|-----------|-----------|
| Nitrogen     | 78.21     | 0.85      |
| Carbon       | 19.12     | 1.24      |
| Hydrogen     | 2.46      | 4.49      |

*Handwritten signature*

## 21. Diaminomethaniminium 5-amino-3-azido-1,2,4-triazol-1-ide (12a)

### a. $^1\text{H}$ NMR

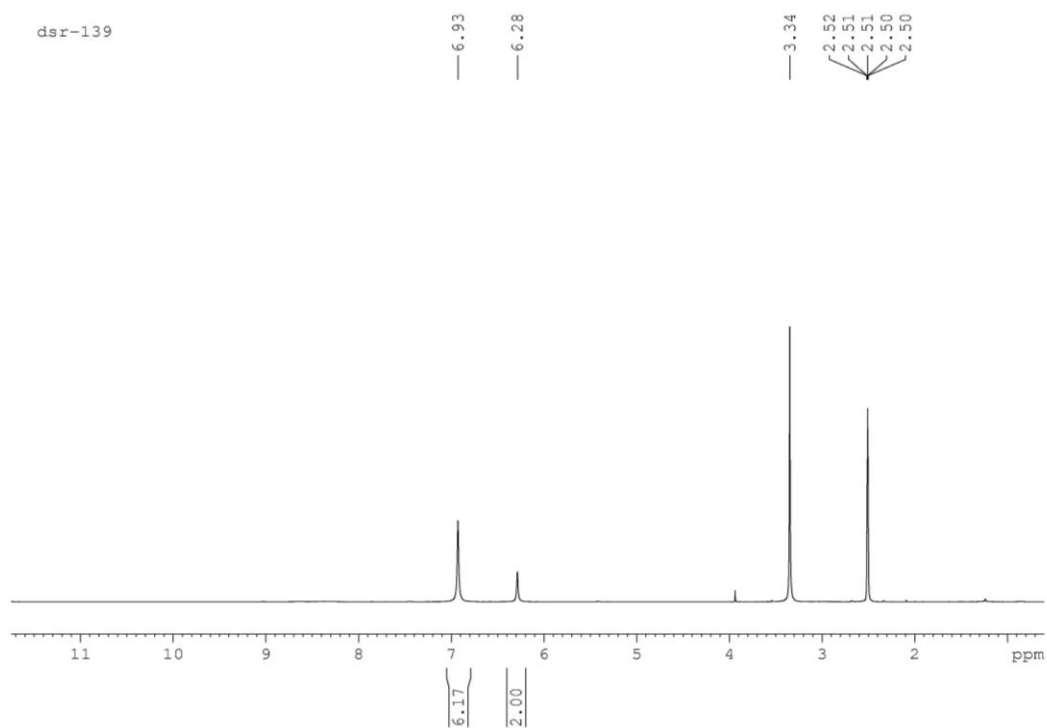

### b. $^{13}\text{C}$ NMR

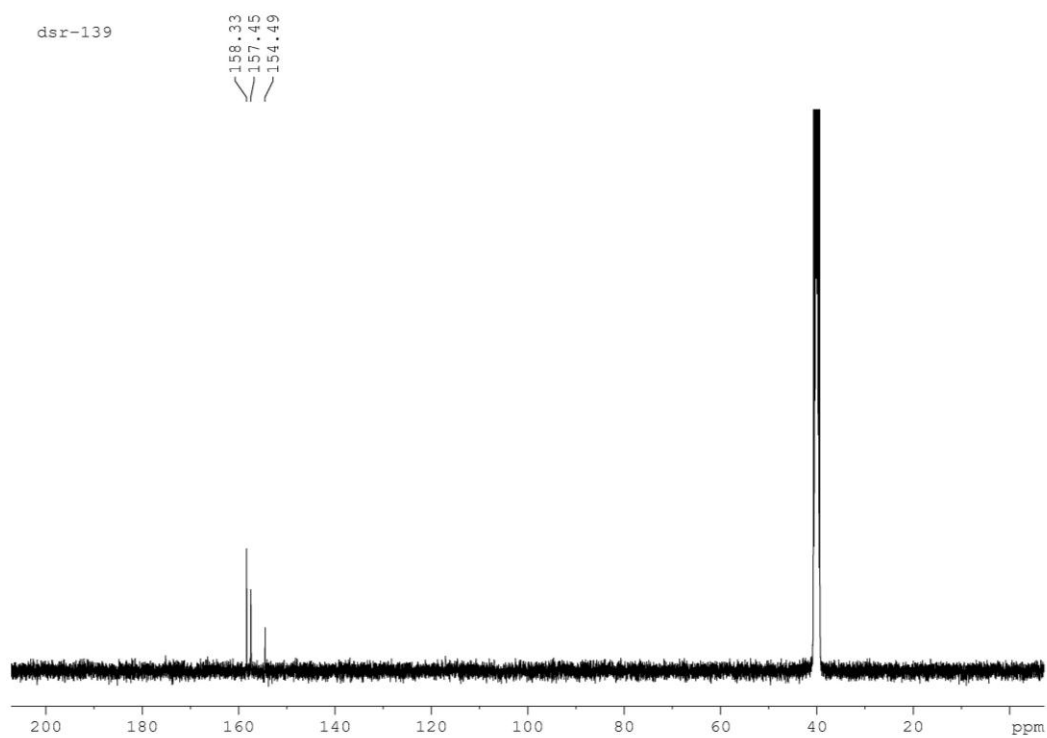

### c. TG-DTA measurement

Sample: DSR-139  
Size: 0.6100 mg  
Method: Ramp

DSC-TGA

File: C:\TA\Data\SDT\srinivasanna\DSR-139.002  
Operator: gsreddy  
Run Date: 05-Dec-12 12:16  
Instrument: SDT Q600 V20.9 Build 20

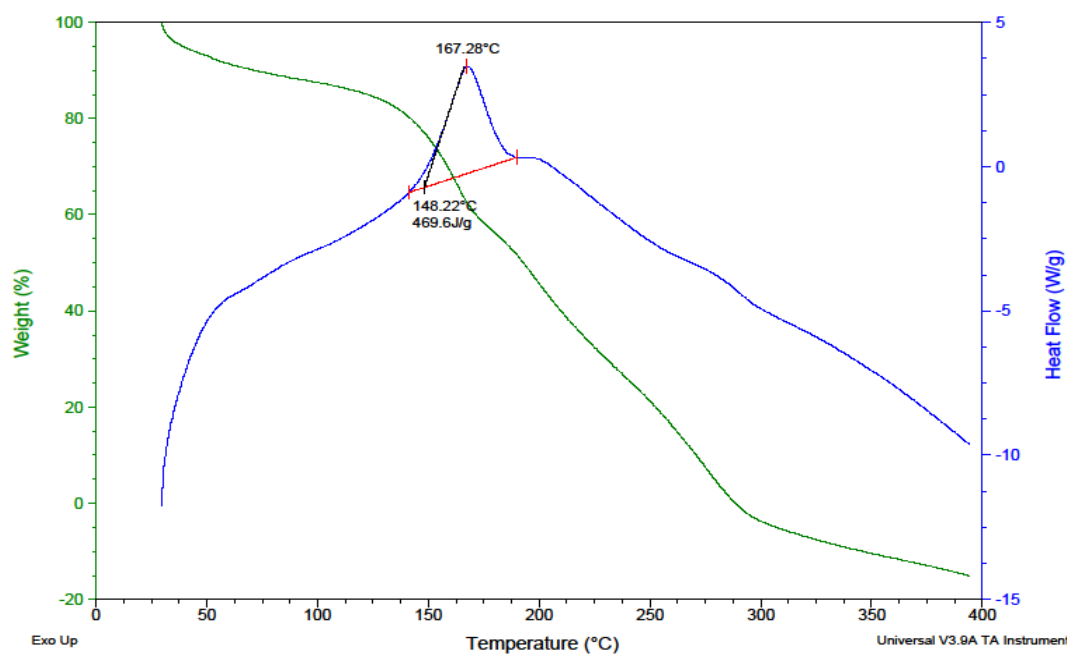

d. HRMS

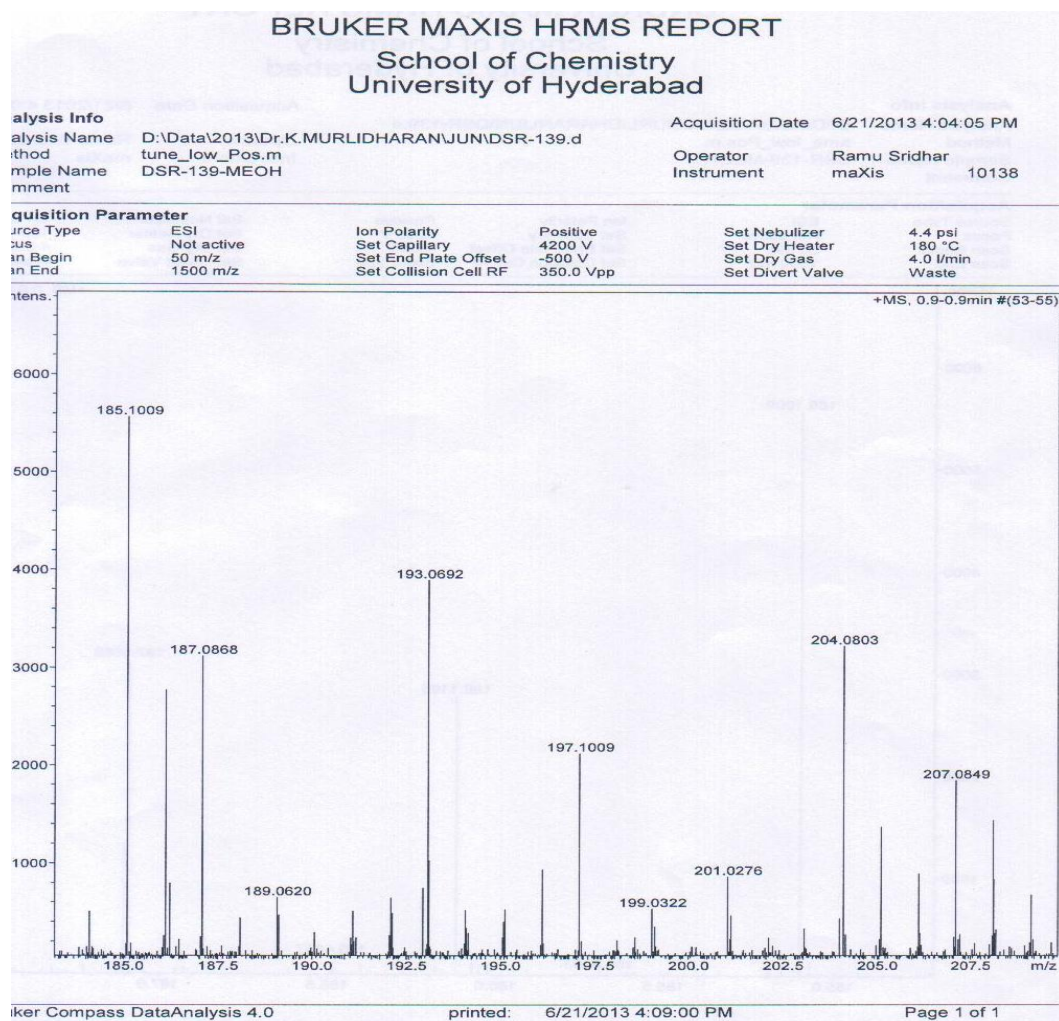

e. C H N analysis

FLASH EA 1112 SERIES CHN REPORT  
SCHOOL OF CHEMISTRY  
UNIVERSITY OF HYDERABAD

Method filename: E:\Program Files\Thermo Finnigan\Eager 300 for EA1112\DATA\Sys\_data  
Sample ID: DSR-139 (# 46)  
Analysis type: UnkNown  
Chromatogram filename: UNK-06022013-16.dat  
Sample weight: .763

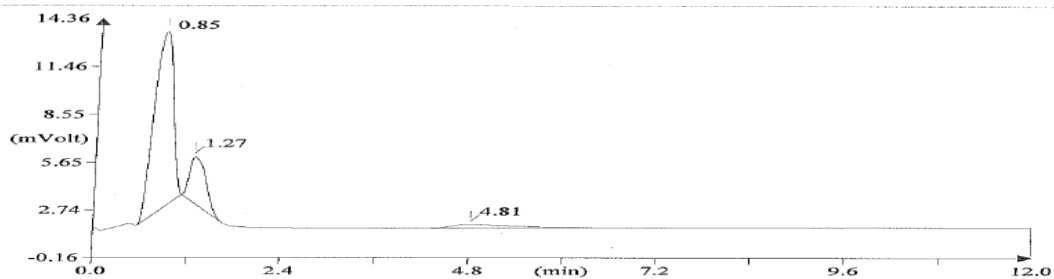

| Element Name | Element % | Ret. Time |
|--------------|-----------|-----------|
| Nitrogen     | 76.21     | 0.85      |
| Carbon       | 19.46     | 1.27      |
| Hydrogen     | 4.31      | 4.81      |

*Handwritten signature*

## 22. 3,5-Diamino-1*H*-1,2,4-triazol-4-ium 5-amino-3-azido-1,2,4-triazol-1-ide (12e)

### a. <sup>1</sup>H NMR

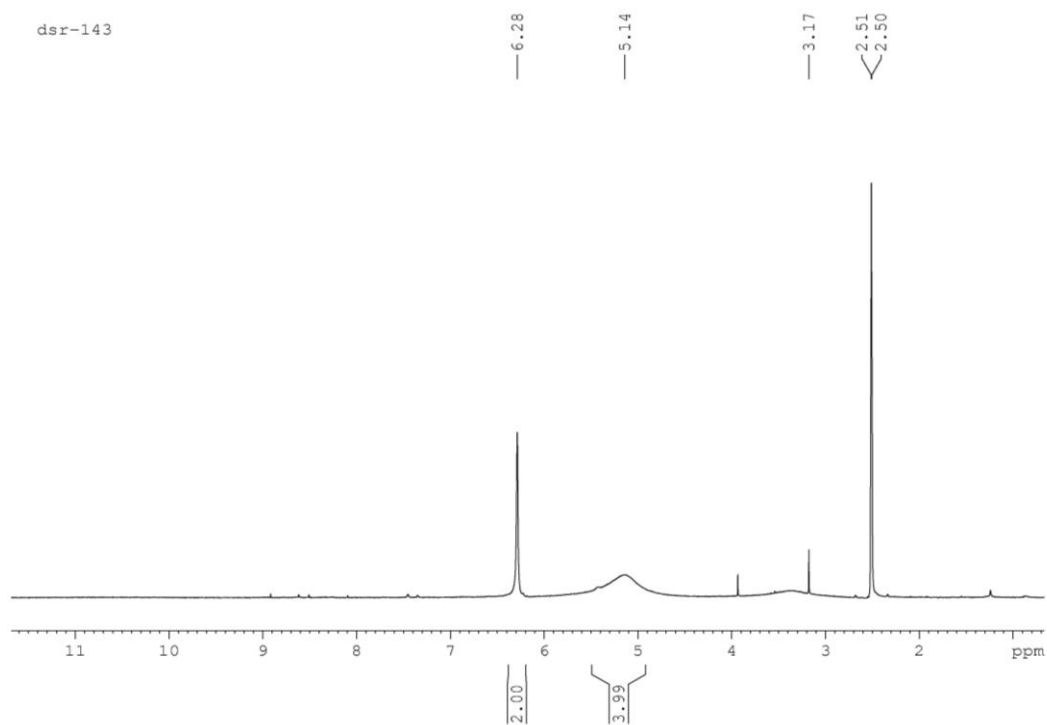

### b. <sup>13</sup>C NMR

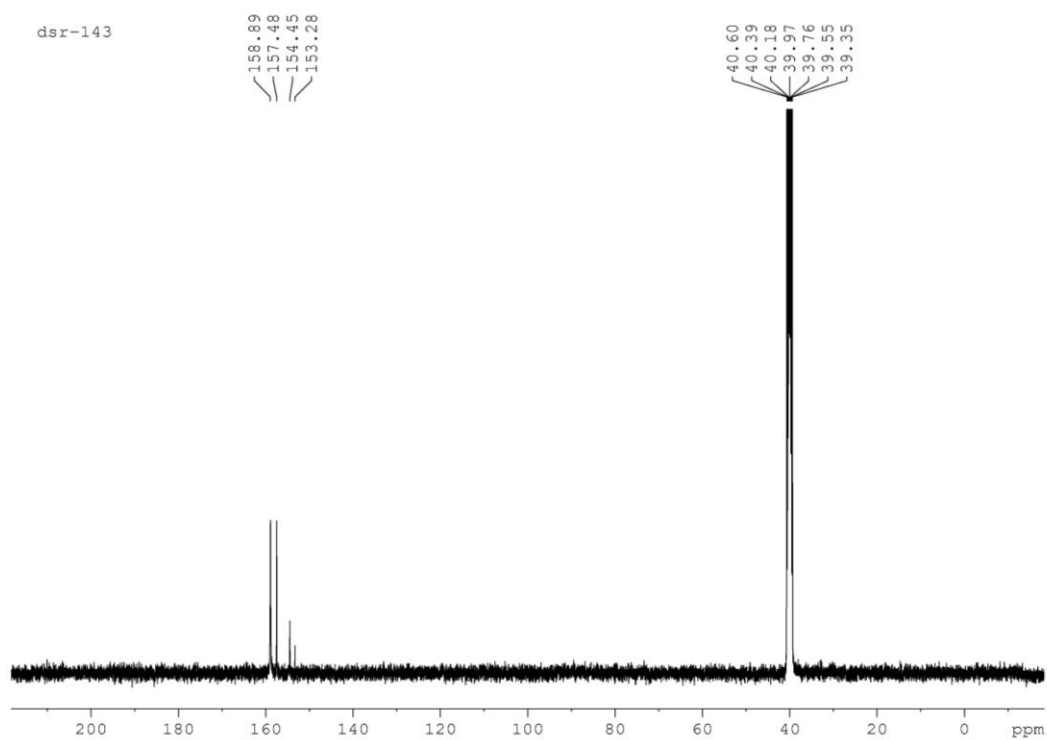

### c. TG-DTA measurement

Sample: DSR-143  
Size: 1.1280 mg  
Method: Ramp

DSC-TGA

File: C:\TA\Data\SDT\srinivasanna\DSR-143.004  
Operator: gsreddy  
Run Date: 06-Dec-12 13:53  
Instrument: SDT Q600 V20.9 Build 20

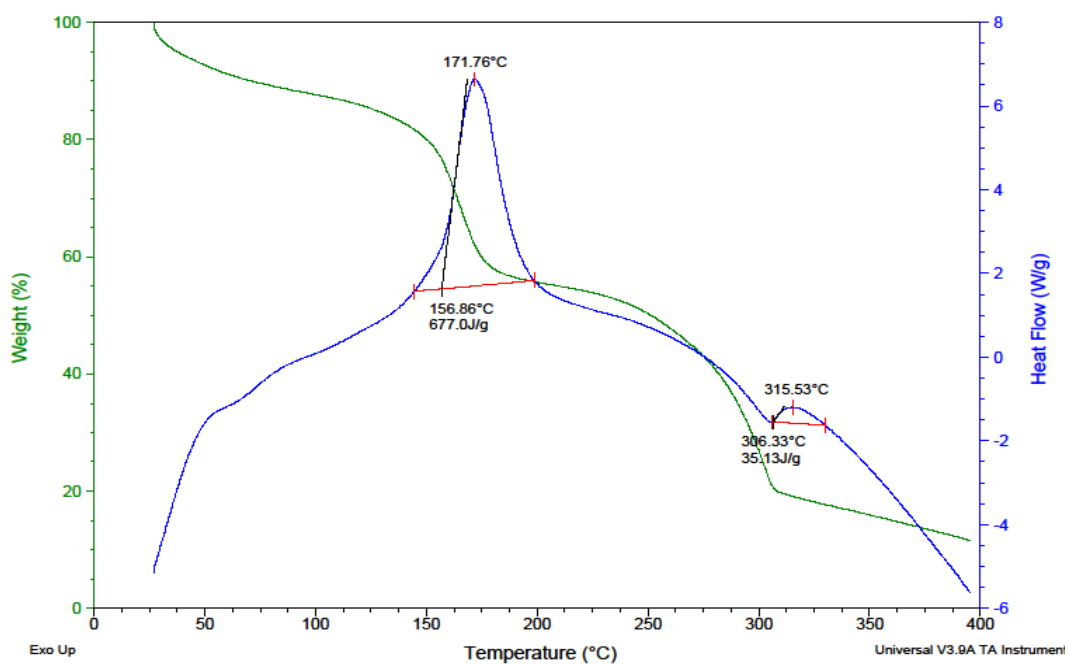



d. HRMS

BRUKER MAXIS HRMS REPORT

School of Chemistry  
University of Hyderabad

|                      |                                              |                  |                      |
|----------------------|----------------------------------------------|------------------|----------------------|
| <b>Analysis Info</b> |                                              | Acquisition Date | 7/10/2013 3:57:44 PM |
| Analysis Name        | D:\Data\2013\Dr.K.MURLIDHARAN\JULY\DSR-143.d | Operator         | Ramu Sridhar         |
| Method               | tune_low_Pos.m                               | Instrument       | maXis 10138          |
| Sample Name          | DSR-143-MEOH                                 |                  |                      |
| Comment              |                                              |                  |                      |

|                              |            |                       |           |                  |           |
|------------------------------|------------|-----------------------|-----------|------------------|-----------|
| <b>Acquisition Parameter</b> |            | Ion Polarity          | Positive  | Set Nebulizer    | 4.4 psi   |
| Source Type                  | ESI        | Set Capillary         | 4400 V    | Set Dry Heater   | 180 °C    |
| Scan Begin                   | Not active | Set End Plate Offset  | -500 V    | Set Dry Gas      | 4.0 l/min |
| Scan End                     | 1500 m/z   | Set Collision Cell RF | 350.0 Vpp | Set Divert Valve | Waste     |

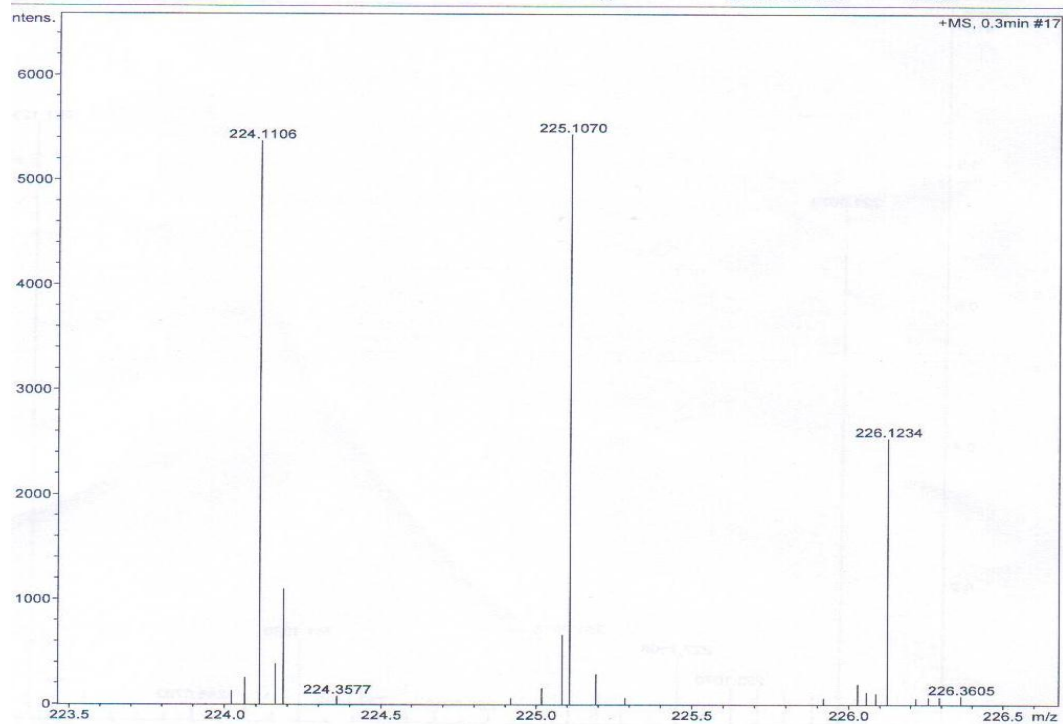

e. C H N analysis

FLASH EA 1112 SERIES CHN REPORT  
SCHOOL OF CHEMISTRY  
UNIVERSITY OF HYDERABAD

Method filename: E:\Program Files\Thermo Finnigan\Eager 300 for EA1112\DATA\Sys\_data\_e  
Sample ID: DSR-143 (# 42)  
Analysis type: UnkNown  
Chromatogram filename: UNK-06022013-12.dat  
Sample weight: 1.912

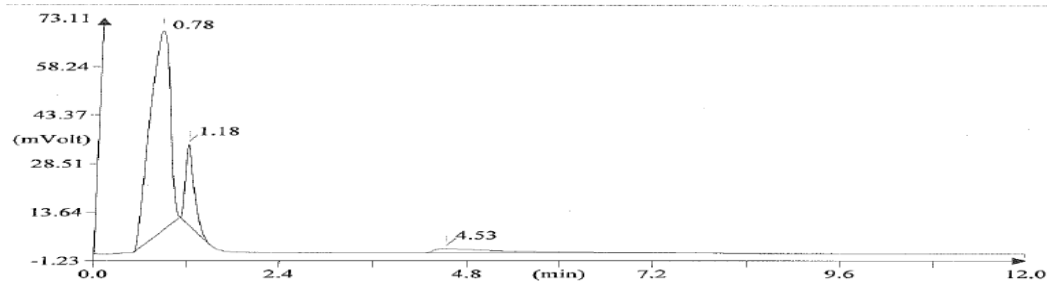

| Element Name | Element % | Ret. Time |
|--------------|-----------|-----------|
| Nitrogen     | 74.85     | 0.78      |
| Carbon       | 21.37     | 1.18      |
| Hydrogen     | 3.65      | 4.53      |

*Handwritten signature*

Table 1. Calculated total energy ( $E_0$ ), zero point energy (ZPE) and thermal correction ( $\Delta H_T$ ) at B3PW91/6-31G(d,p) level for selective nonionic compounds and their molecular surface properties.

| Comp.     | $E_0$<br>(a.u.) | ZPE<br>(a.u.) | $\Delta H_T$<br>(a.u.) | A<br>( $\text{\AA}^2$ ) | $\sigma_{\text{tot}}^2$<br>(kcal/mol) | $\nu$ |
|-----------|-----------------|---------------|------------------------|-------------------------|---------------------------------------|-------|
| <b>5</b>  | -795.27592      | 0.1445        | 0.0130                 | 217.21                  | 702.91                                | 0.20  |
| <b>7</b>  | -996.87609      | 0.1547        | 0.0152                 | 255.88                  | 534.86                                | 0.18  |
| <b>9</b>  | -499.02838      | 0.0878        | 0.0078                 | 151.34                  | 432.26                                | 0.22  |
| <b>10</b> | -554.35787      | 0.1046        | 0.0093                 | 166.32                  | 235.98                                | 0.23  |
| <b>11</b> | -662.54621      | 0.0908        | 0.0105                 | 186.37                  | 213.53                                | 0.22  |
| <b>12</b> | -460.94548      | 0.0805        | 0.0085                 | 147.58                  | 402.34                                | 0.16  |

A: Area of the isosurface of 0.001 electrons/bohr<sup>3</sup> electronic density.  $\nu$ : Degree of balance between the positive and negative surface potentials.  $\sigma_{\text{tot}}^2$ : Measure of variability of the electrostatic potential.
